# Supplementary material for: Electrocatalytic reduction of CO2 to CO by a series of organometallic Re(i)-tpy complexes
Source: Royal Society of Chemistry journal article supplement (doi:10.1039/d3dt00441d), 2023-01-01
Supplement: d3dt00441d1.pdf [file d3dt00441d1.pdf]

# ***Electrocatalytic reduction of CO<sub>2</sub> to CO by a Series of organometallic Re(I)-tpy complexes***

*Shriya Saha<sup>a</sup>, Thomas Doughty<sup>b</sup>, Dibyendu Banerjee<sup>c</sup>, Sunil K. Patel<sup>a</sup>, Dibyendu Mallick<sup>\*c</sup>, E. Siva Subramaniam Iyer<sup>a</sup>, Souvik Roy<sup>\*b</sup>, Raja Mitra<sup>\*a</sup>*

<sup>a</sup>*School of Chemical and Materials Sciences, Indian Institute of Technology Goa, Farmagudi, Goa 403401, India. Email: [rajamitra@iitgoa.ac.in](mailto:rajamitra@iitgoa.ac.in)*

<sup>b</sup>*School of Chemistry, University of Lincoln, Green Lane, Lincoln, Lincolnshire, LN6 7DL, UK. Email: [sroy@lincoln.ac.uk](mailto:sroy@lincoln.ac.uk)*

<sup>c</sup>*Department of Chemistry, Presidency University, Kolkata 700073, India. Email: [dibyendu.chem@presiuniv.ac.in](mailto:dibyendu.chem@presiuniv.ac.in)*

**Table of content:**

| <b>Topics</b>                                                                                                          | <b>Page number</b> |
|------------------------------------------------------------------------------------------------------------------------|--------------------|
| <i>Characterisation of L2</i>                                                                                          | S3-S5              |
| <i>Characterisation of L3</i>                                                                                          | S6-S8              |
| <i>Characterisation of L4</i>                                                                                          | S9-S11             |
| <i>Characterisation of L5</i>                                                                                          | S12-S14            |
| <i>Characterisation of Re1</i>                                                                                         | S15-S18            |
| <i>Characterisation of Re2</i>                                                                                         | S19-S22            |
| <i>Characterisation of Re3</i>                                                                                         | S23-S26            |
| <i>Characterisation of Re4</i>                                                                                         | S27-S30            |
| <i>Characterisation of Re5</i>                                                                                         | S31-S37            |
| <i>ATR-IR comparison study</i>                                                                                         | S38                |
| <i>Stability of the metal complexes in acetonitrile monitored by UV-Vis</i>                                            | S39                |
| <i>TD-DFT study of Re1-5</i>                                                                                           | S40-S44            |
| <i>Transient Absorption studies of Re1-5 and L5</i>                                                                    | S45-S49            |
| <i>Scan rate-dependent Cyclic Voltammograms of Re1-5</i>                                                               | S49-S51            |
| <i>Diffusion coefficients for Re1-5 and Re7</i>                                                                        | S52                |
| <i>Fast scan rate-dependent Cyclic Voltammograms of Re1-5 and Re7</i>                                                  | S53                |
| <i>Catalytic Cyclic Voltammograms of Re1-5 and Re7 in absence and presence of trifluoroethanol</i>                     | S53                |
| <i>Catalytic Cyclic Voltammograms of Re1-5 at fast scan rates</i>                                                      | S54                |
| <i>Representative Cyclic Voltammogram of Re2 for <math>i_{cat}</math> and <math>i_p</math> determination</i>           | S54                |
| <i>Cyclic Voltammogram of Re2 under different scan rates</i>                                                           | S55                |
| <i>Cyclic Voltammogram of Re3 and Re4 showing effect of water on electrocatalysis</i>                                  | S55                |
| <i>Cyclic Voltammogram of Re2 under <math>N_2</math> and <math>CO_2</math> with varying amount of trifluoroethanol</i> | S56                |
| <i>Fast scan Cyclic Voltammograms of Re2 with varying amount of trifluoroethanol</i>                                   | S56                |
| <i>Controlled potential electrolysis (CPE) of Re1-5 in <math>CO_2</math></i>                                           | S57                |
| <i>Stability studies after CPE Re5, Re1 and Re2 by UV-Vis</i>                                                          | S57-58             |
| <i>Rinse test</i>                                                                                                      | S59                |
| <i>References</i>                                                                                                      | S59                |
| <i>Cartesian coordinates for L1-5 and Re1-5</i>                                                                        | S60-S69            |

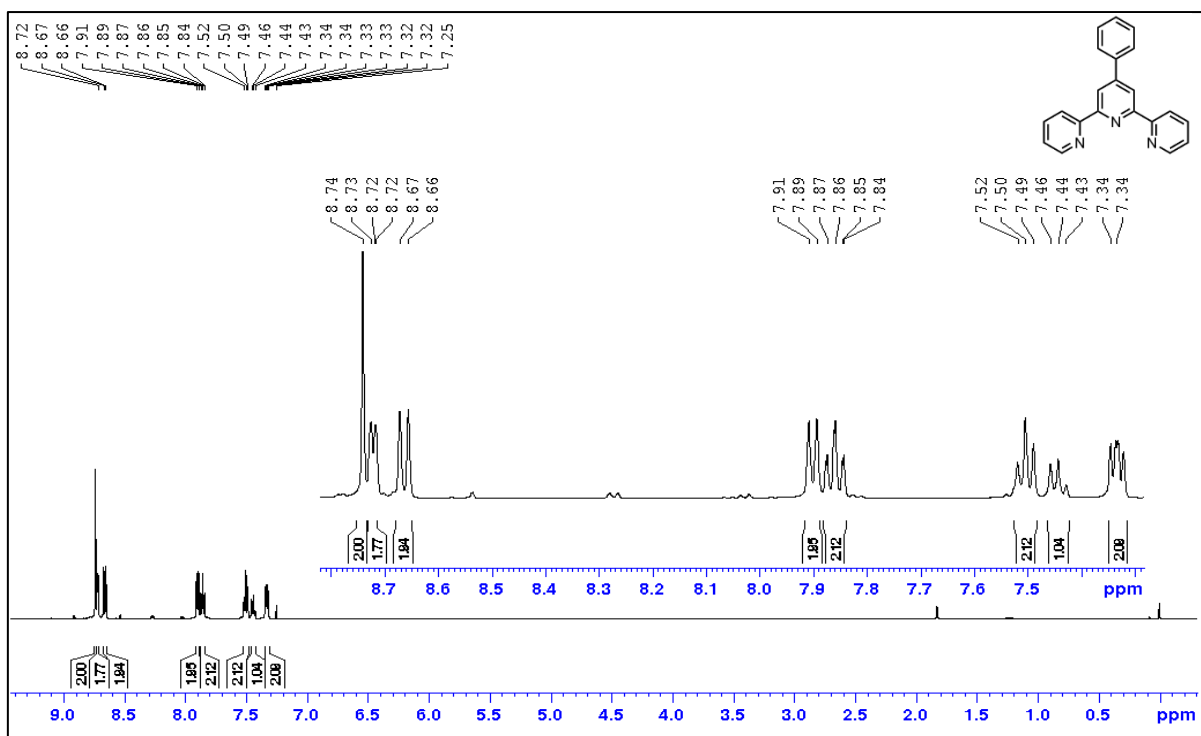

Figure S1a:  $^1\text{H}$  NMR spectrum of L2 (500 MHz,  $\text{CDCl}_3$ ).

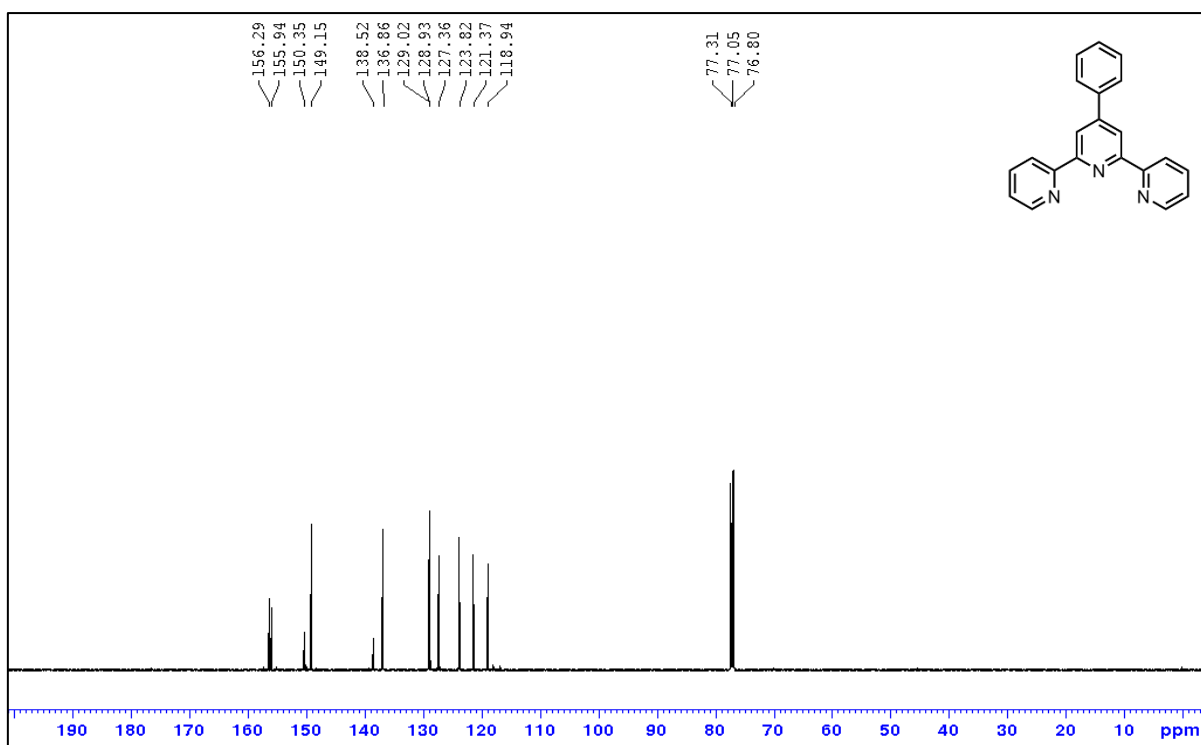

Figure S1b:  $^{13}\text{C}\{^1\text{H}\}$  NMR spectrum of L2 (125 MHz,  $\text{CDCl}_3$ ).

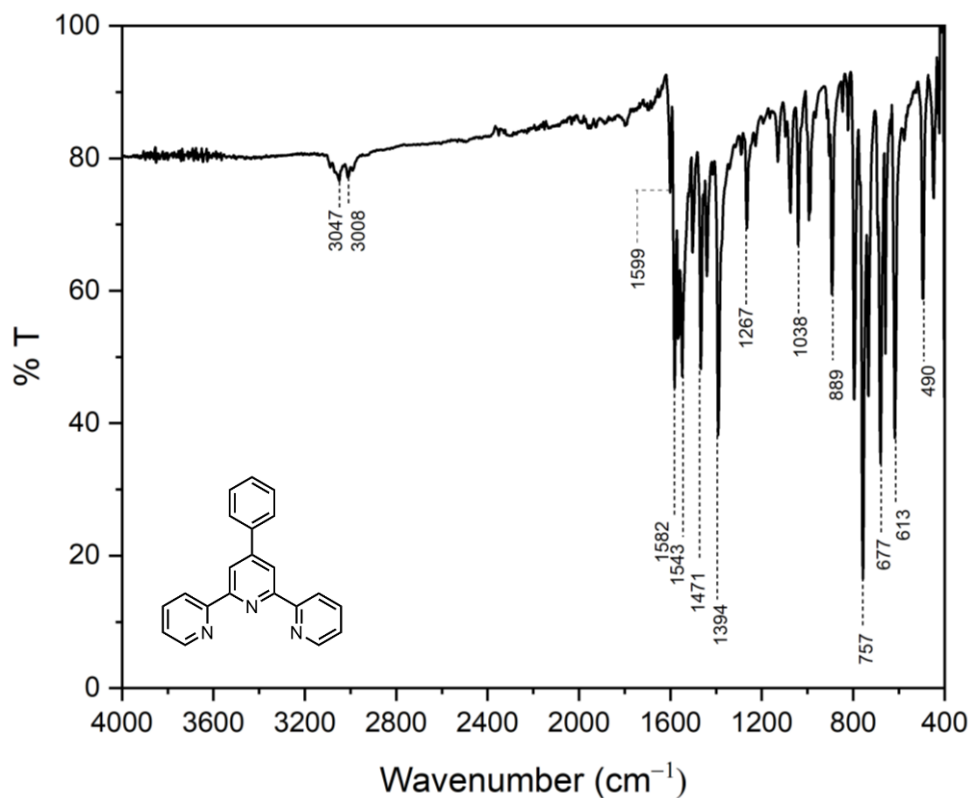

**Figure S1c:** ATR-IR spectrum of L2.

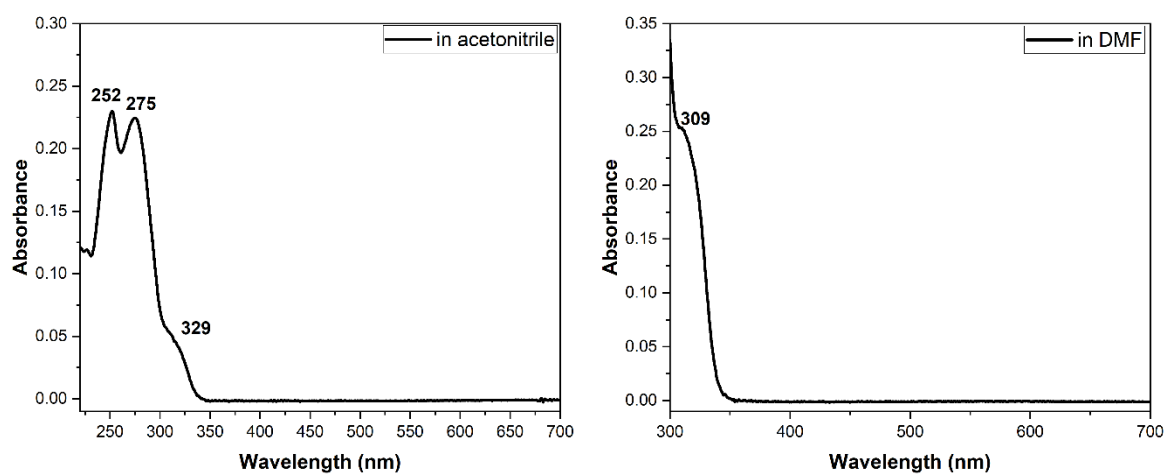

**Figure S1d:** Absorbance spectra of L2 (0.01 mM) in acetonitrile and DMF.



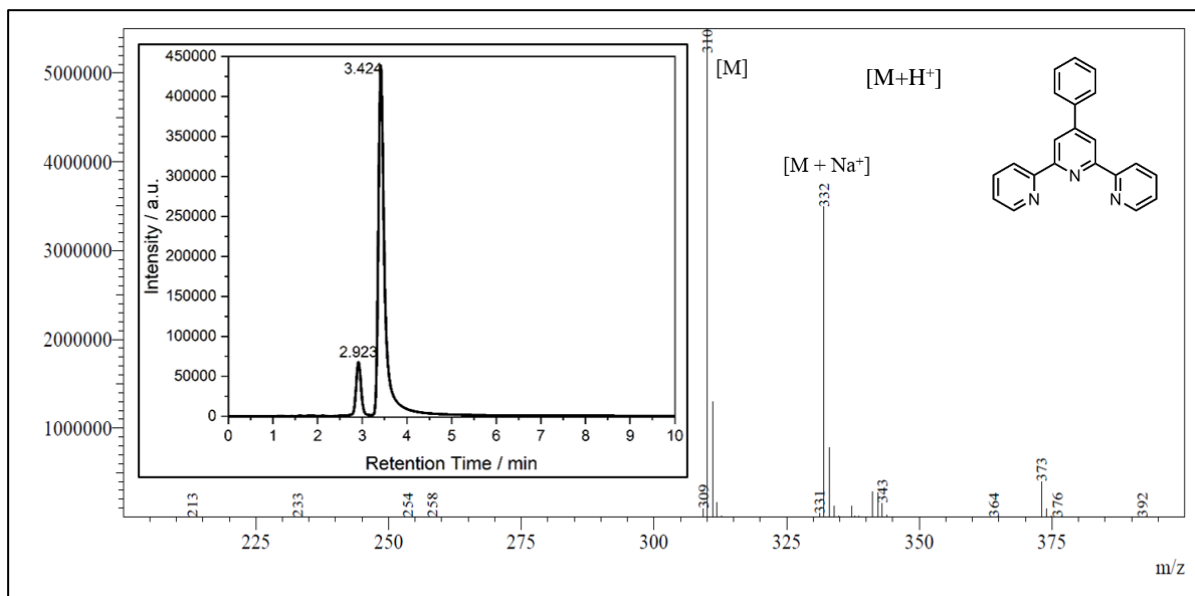

**Figure S1e:** LC-MS spectrum of **L2**, mass values shown at 3.424 min; Mass fragmentation pattern for **L2** [ $C_{21}H_{15}N_3 = M$ ];  $m/z = 310$  [ $M+H$ ]<sup>+</sup> ( $C_{21}H_{16}N_3$ ),  $m/z = 332$  [ $M+Na$ ]<sup>+</sup> ( $C_{21}H_{16}N_3Na$ ).

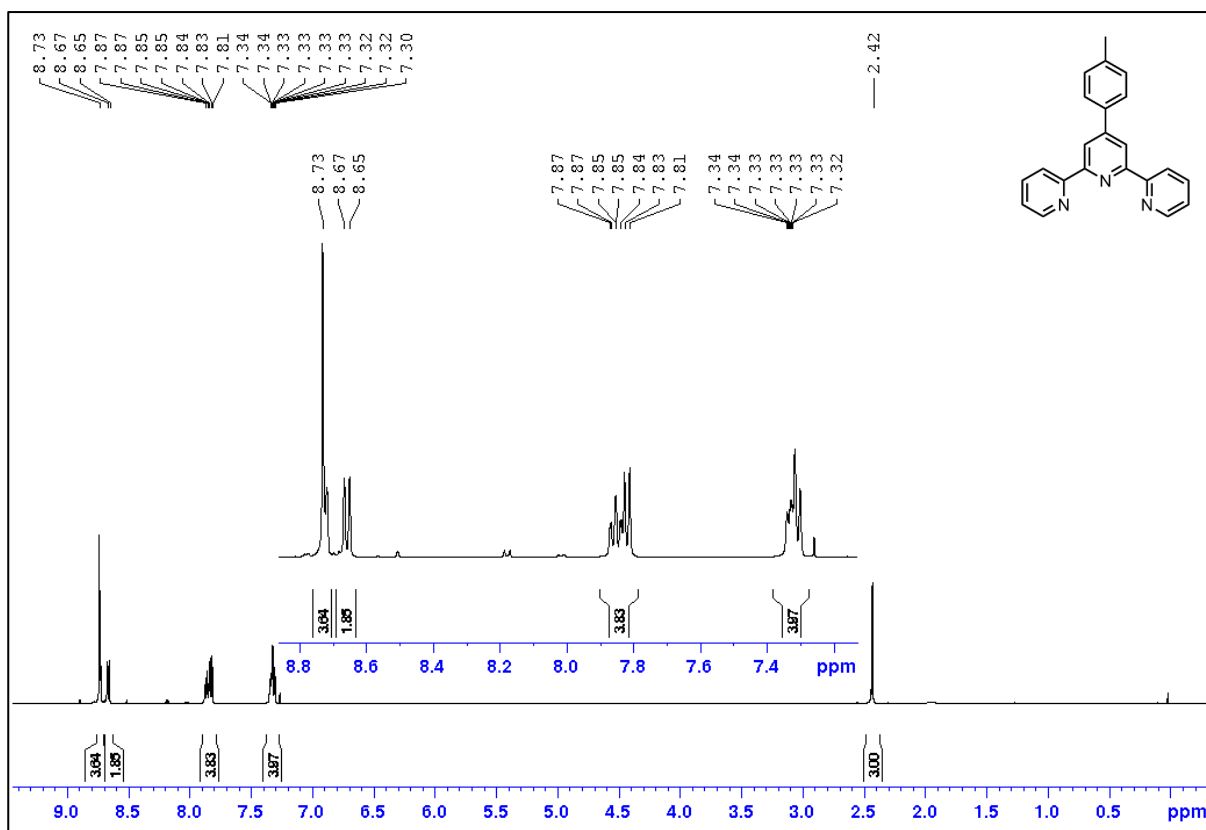

**Figure S2a:**  $^1\text{H}$  NMR spectrum of **L3** (500 MHz,  $\text{CDCl}_3$ ).

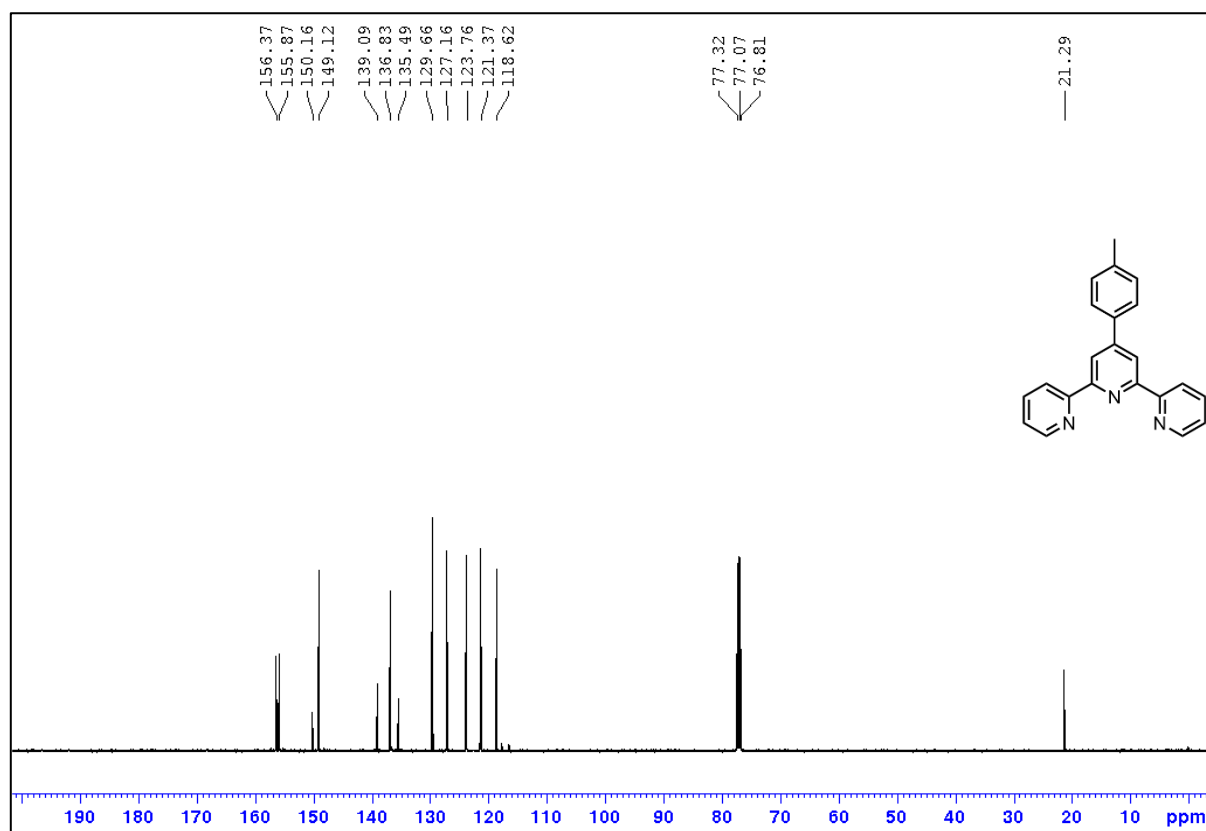

**Figure S2b:**  $^{13}\text{C}\{^1\text{H}\}$  NMR spectrum of **L3** (125 MHz,  $\text{CDCl}_3$ ).

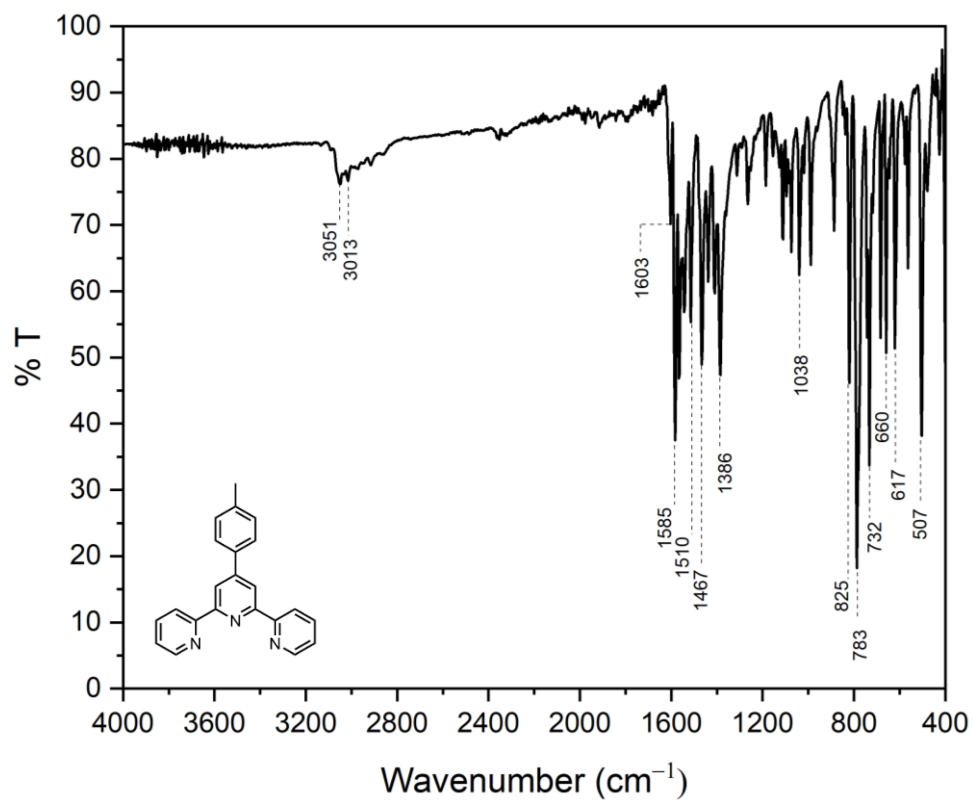

**Figure S2c:** ATR-IR spectrum of L3.

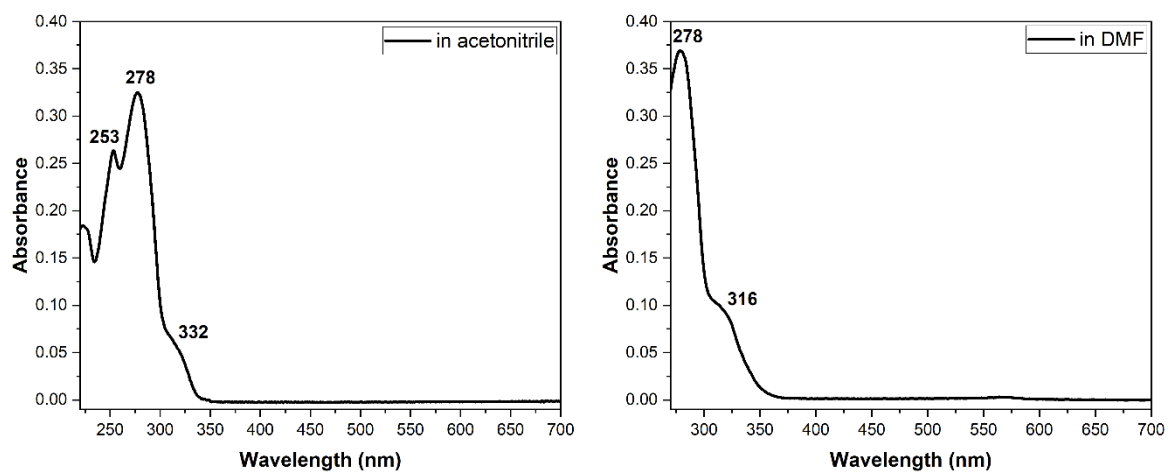

**Figure S2d:** Absorbance spectra of L3 (0.01 mM) in acetonitrile and DMF.

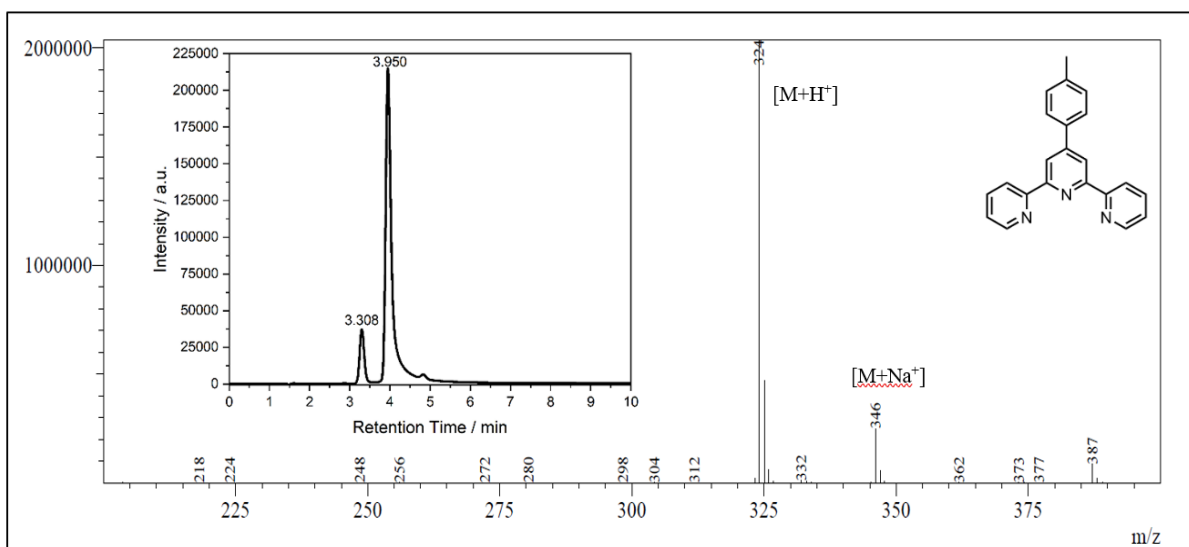

**Figure S2e:** LC-MS spectrum of **L3**, mass values shown at 3.950 min; Mass fragmentation pattern for **L3** [ $C_{22}H_{17}N_3 = M$ ];  $m/z = 324$   $[M+H]^+$  ( $C_{22}H_{18}N_3$ ),  $m/z = 346$   $[M+Na]^+$  ( $C_{22}H_{18}N_3Na$ ).

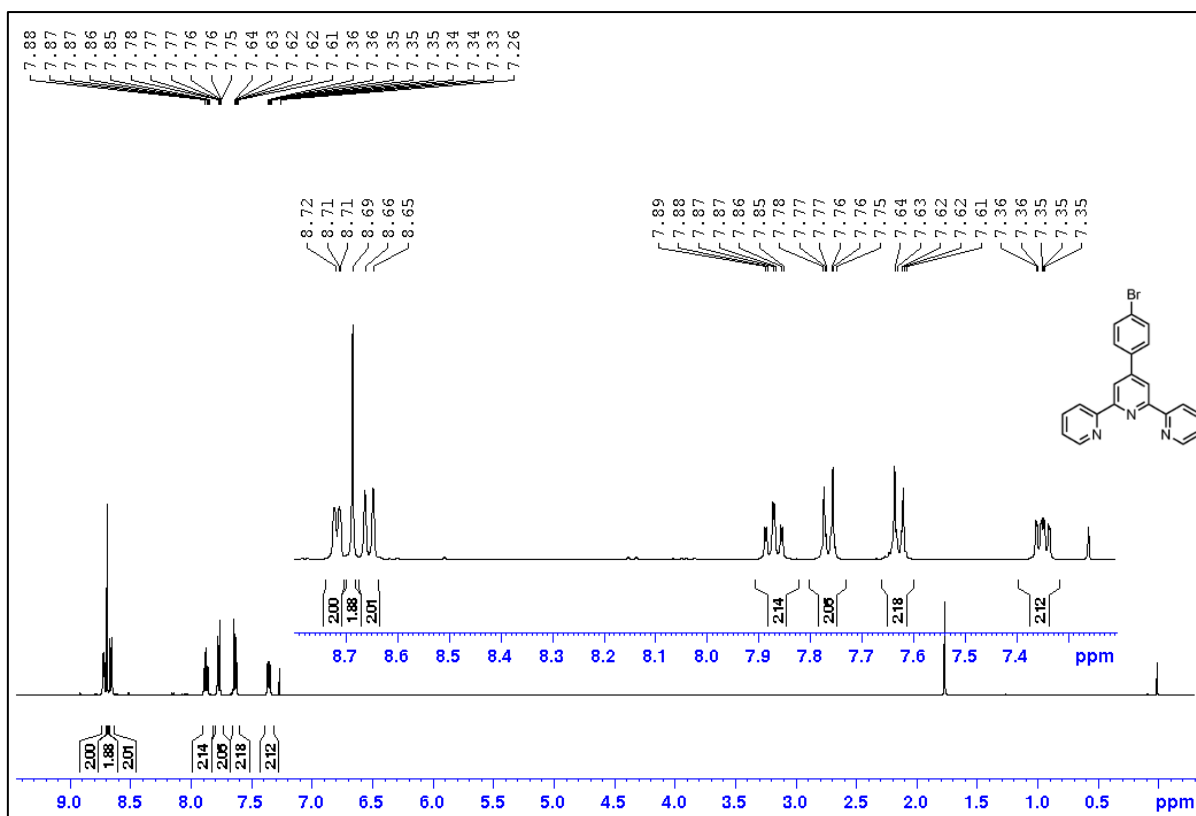

**Figure S3a:**  $^1\text{H}$  NMR spectrum of **L4** (500 MHz,  $\text{CDCl}_3$ ) (water peak at 1.6 ppm).

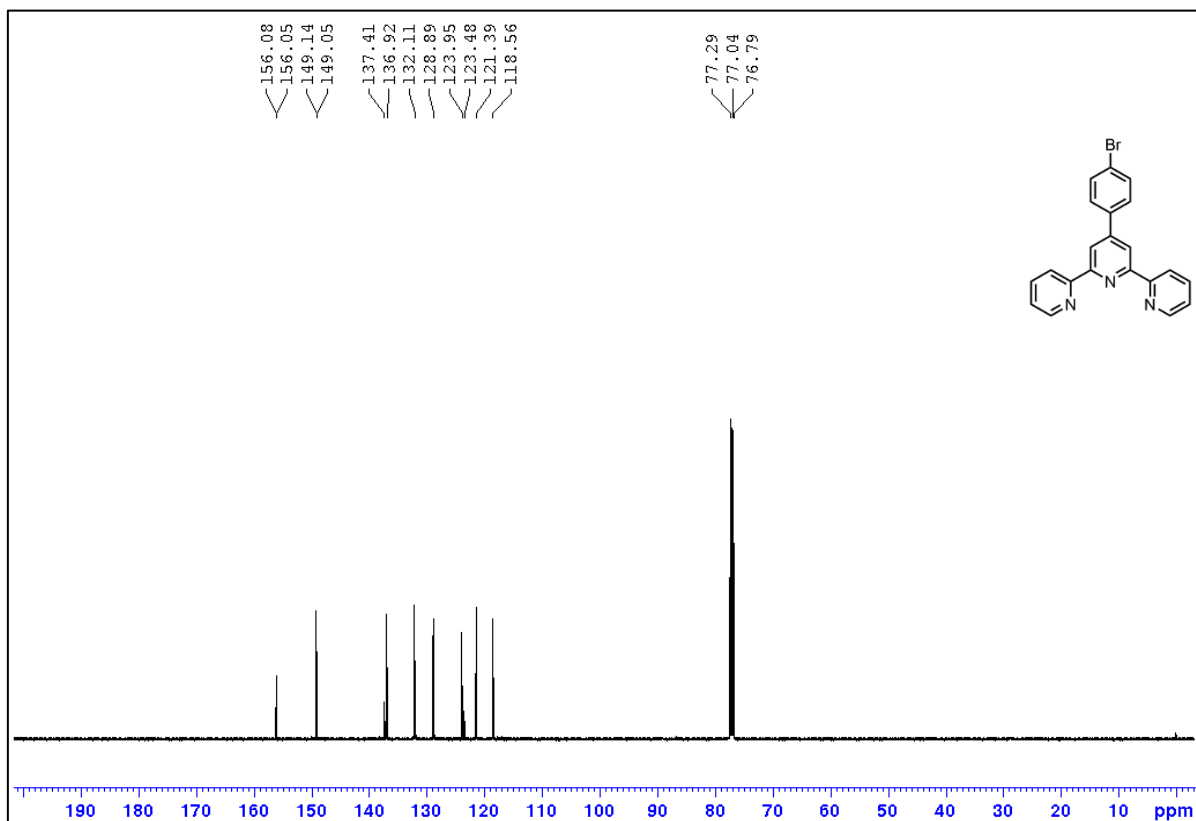

**Figure S3b:**  $^{13}\text{C}\{^1\text{H}\}$  NMR spectrum of **L4** (125 MHz,  $\text{CDCl}_3$ ).

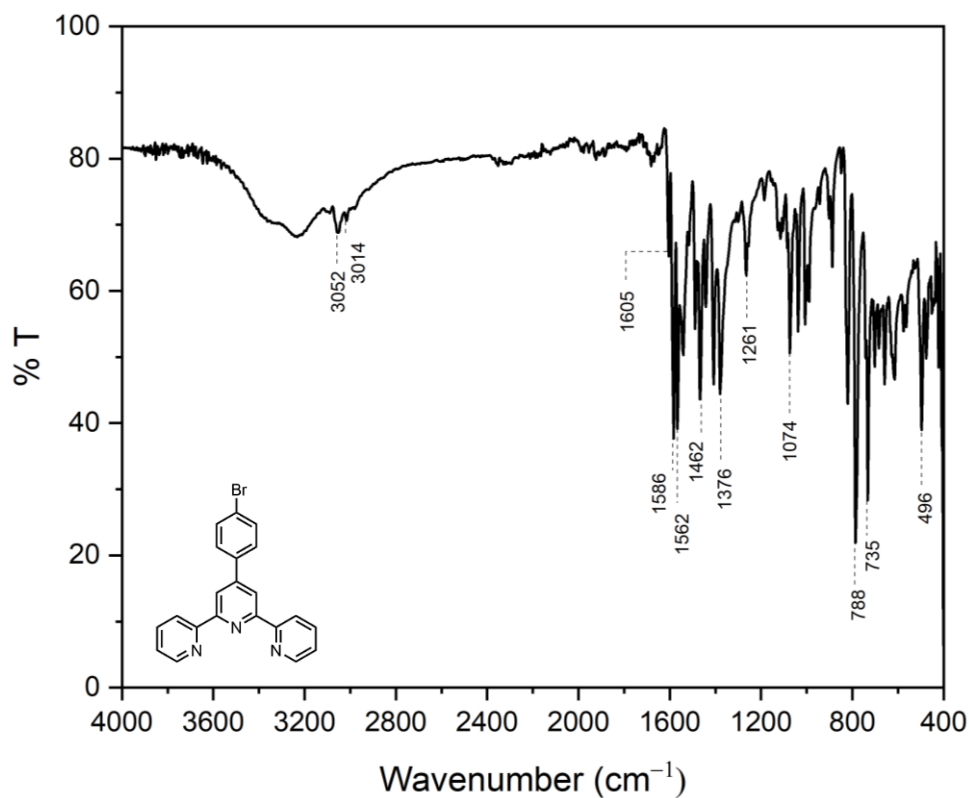

**Figure S3c:** ATR-IR spectrum of **L4**.

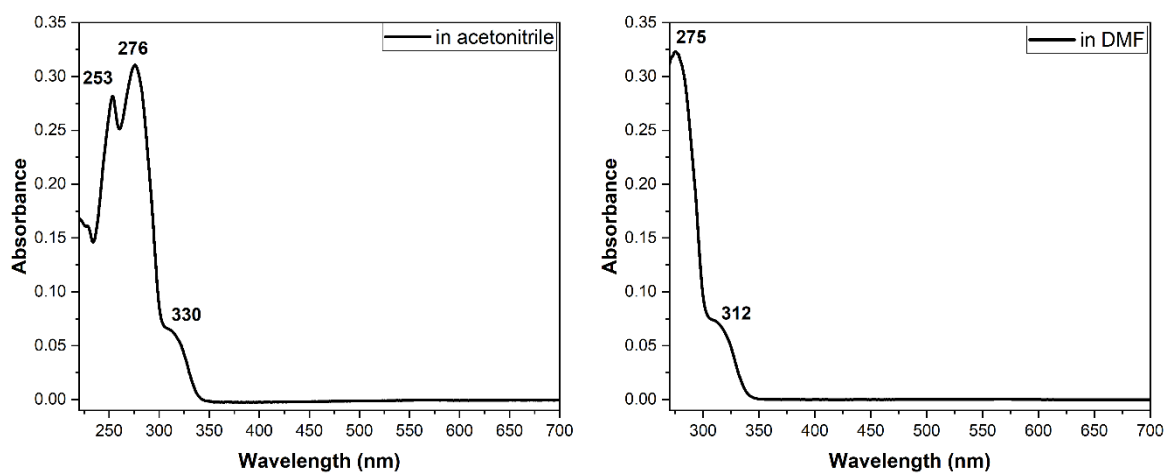

**Figure S3d:** Absorbance spectra of **L4** (0.01 mM) in acetonitrile and DMF.

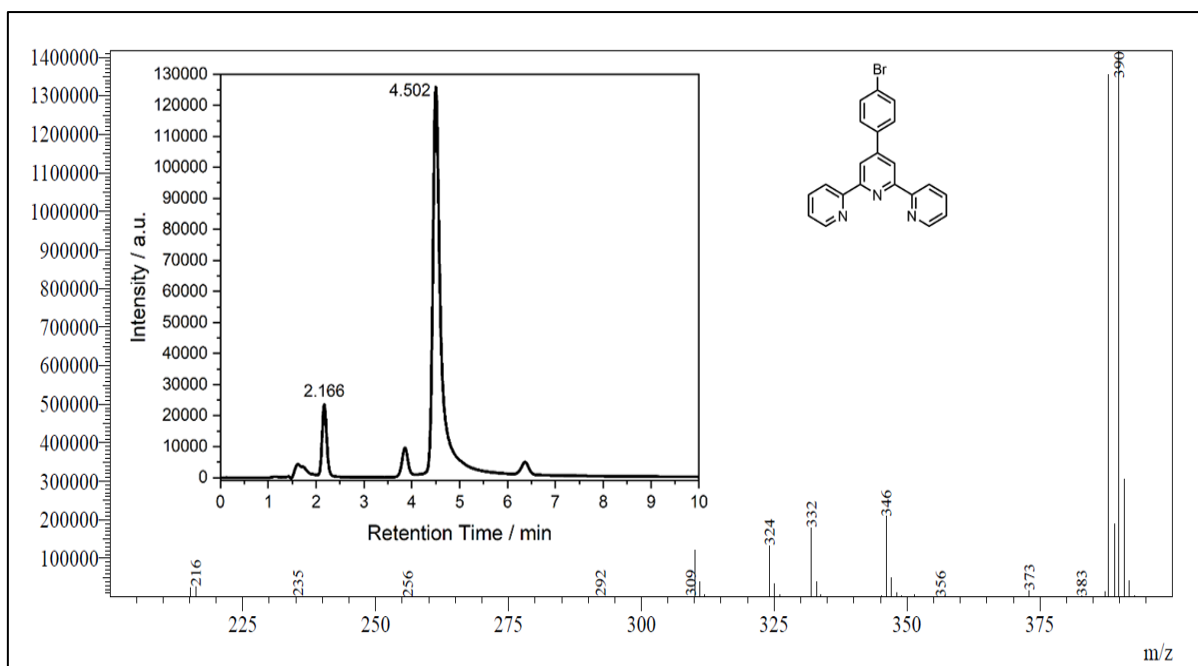

**Figure S3e:** LC-MS spectrum of **L4**, mass values shown at 4.502 min; Mass fragmentation pattern for **L4** [ $C_{21}H_{14}BrN_3 = M$ ];  $m/z = 388 [M+H]^+$  ( $C_{21}H_{15}^{79}BrN_3$ );  $m/z = 390 [M+H]^+$  ( $C_{21}H_{15}^{81}BrN_3$ ).

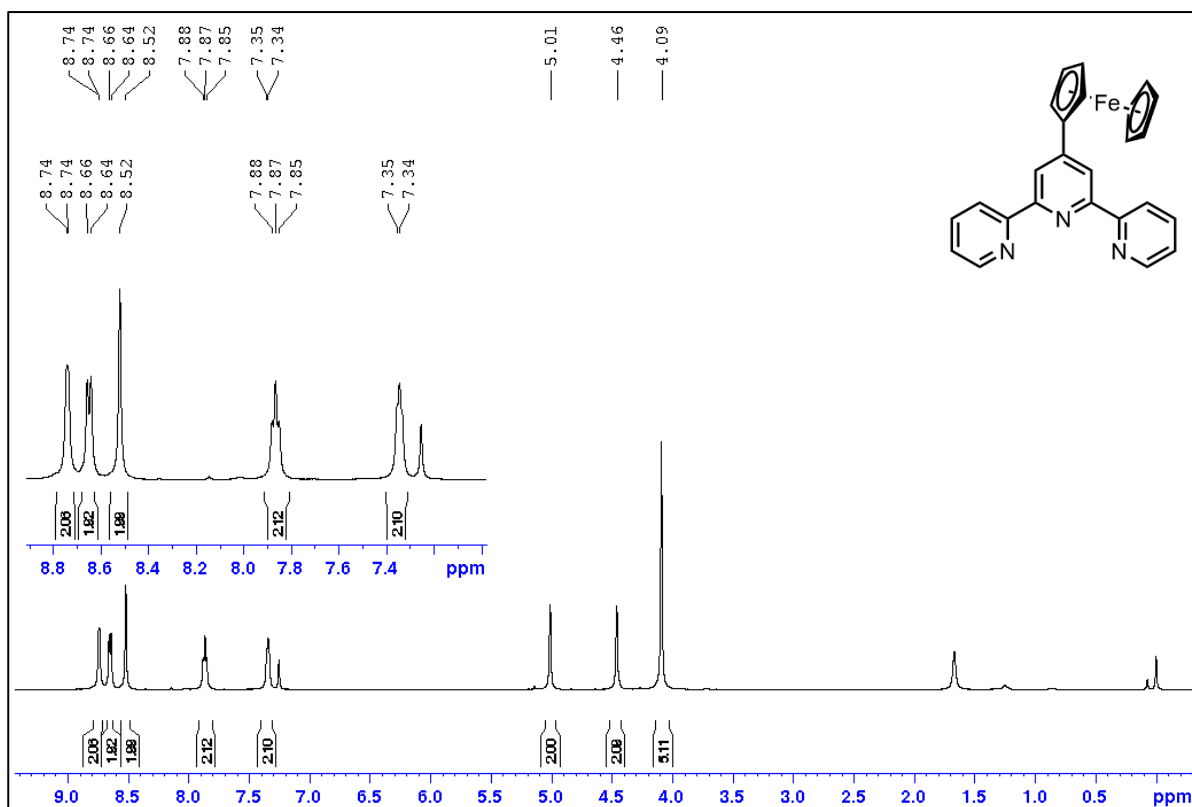

Figure S4a:  $^1\text{H}$  NMR spectrum of L5 (500 MHz,  $\text{CDCl}_3$ ) (water peak at 1.6 ppm).

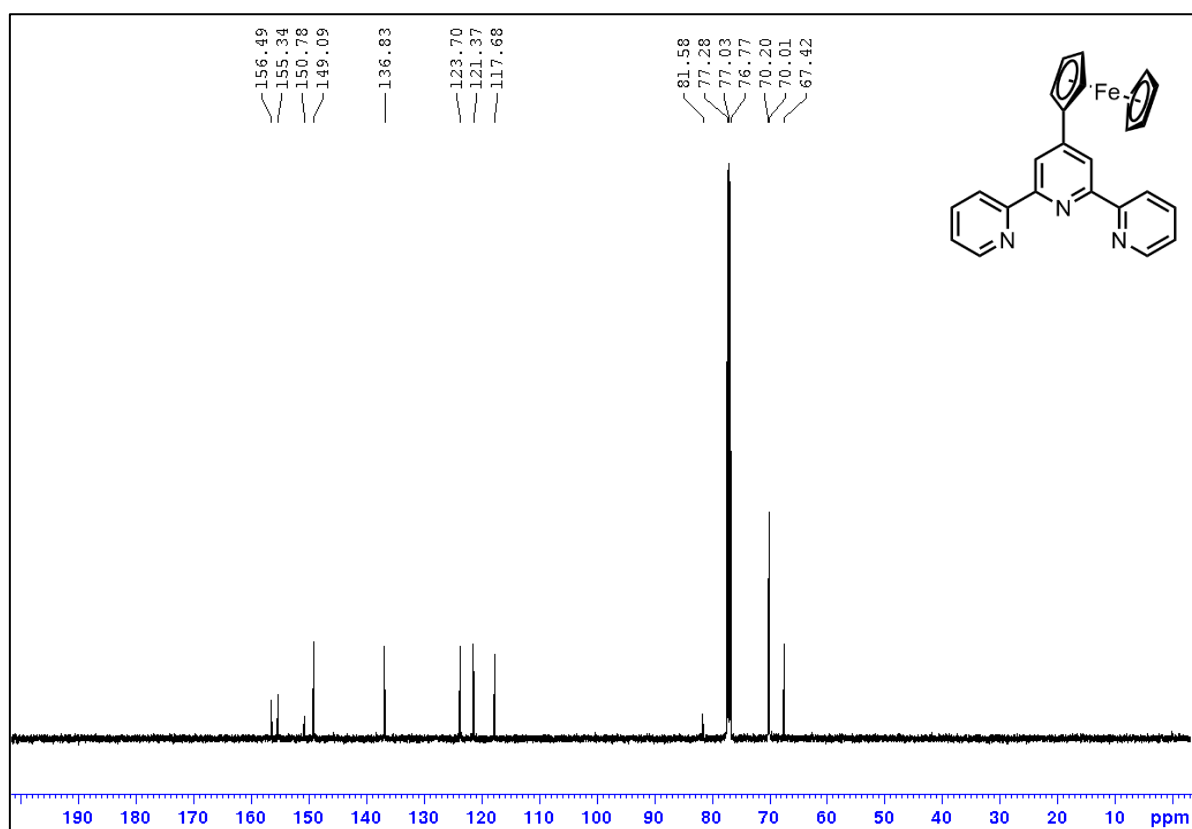

Figure S4b:  $^{13}\text{C}\{^1\text{H}\}$  NMR spectrum of L5 (125 MHz,  $\text{CDCl}_3$ ).



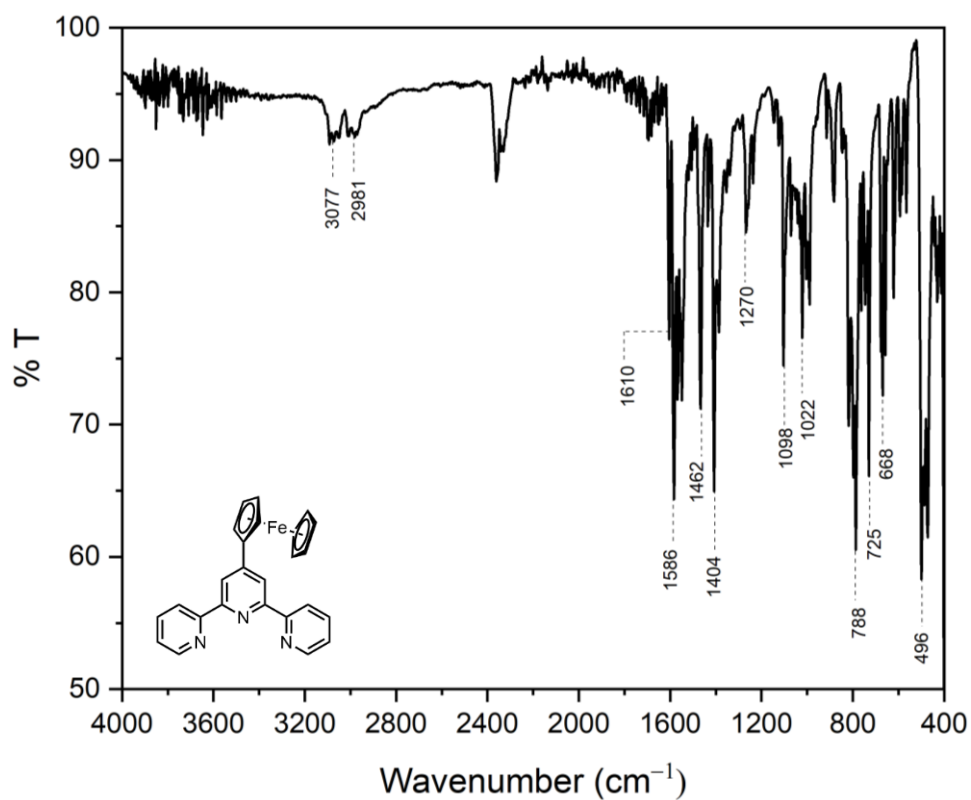

**Figure S4c:** ATR-IR spectrum of L5.

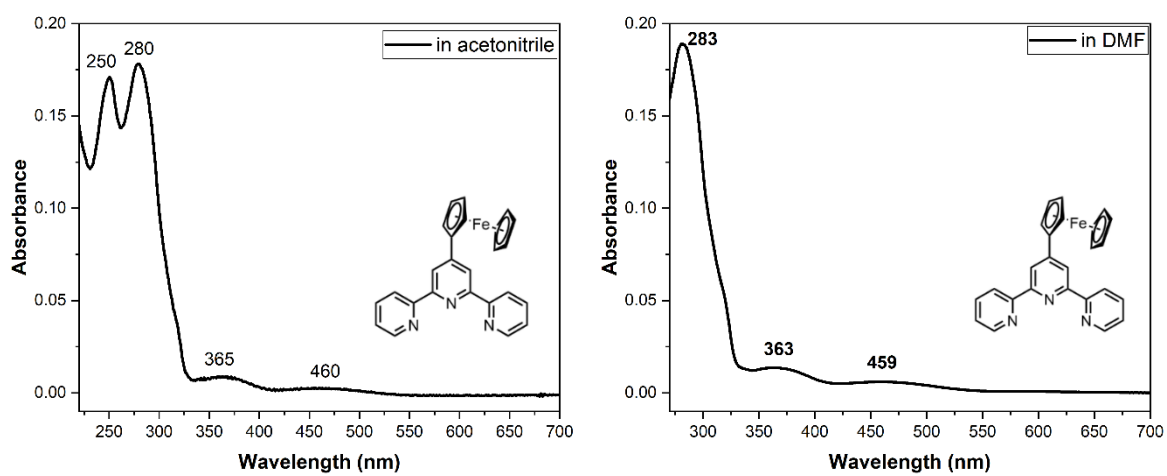

**Figure S4d:** Absorbance spectra of L5 (0.01 mM) in acetonitrile and DMF.

## <Sample Information>

|                  |                                 |              |           |
|------------------|---------------------------------|--------------|-----------|
| Sample Name      | : L5                            | Sample Type  | : Unknown |
| Sample ID        | : L5                            | Acquired by  | : IIT GOA |
| Data Filename    | : L5_25-03-2023.lcd             | Processed by | : IIT GOA |
| Method Filename  | : C_95_D_5_10_min_0.2ml_min.lcm |              |           |
| Batch Filename   | : 25032023.lcb                  |              |           |
| Vial #           | : 1-91                          |              |           |
| Injection Volume | : 1 uL                          |              |           |
| Date Acquired    | : 3/25/2023 12:42:27 PM         |              |           |
| Date Processed   | : 3/25/2023 12:58:21 PM         |              |           |

## <Chromatogram>

mAU

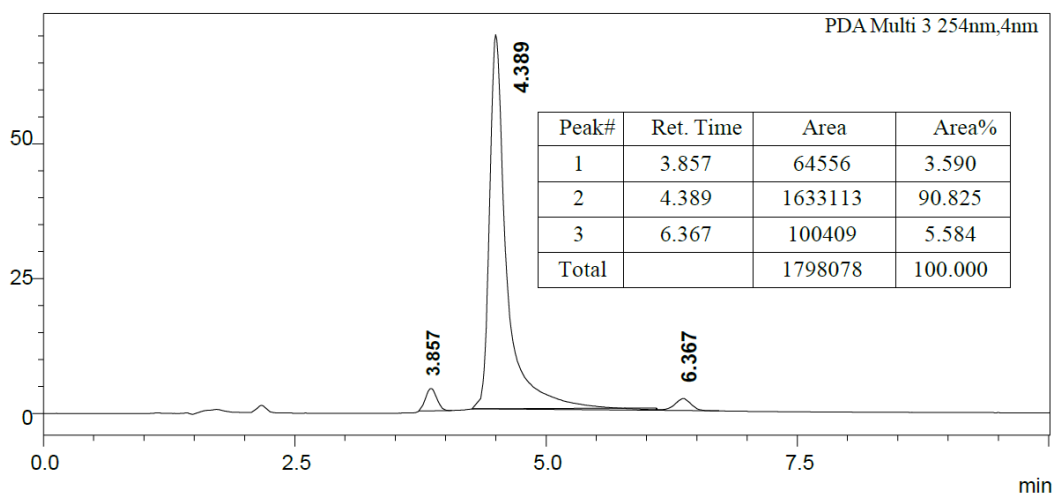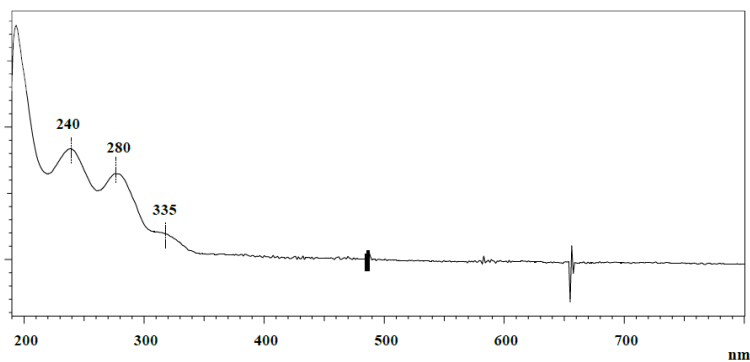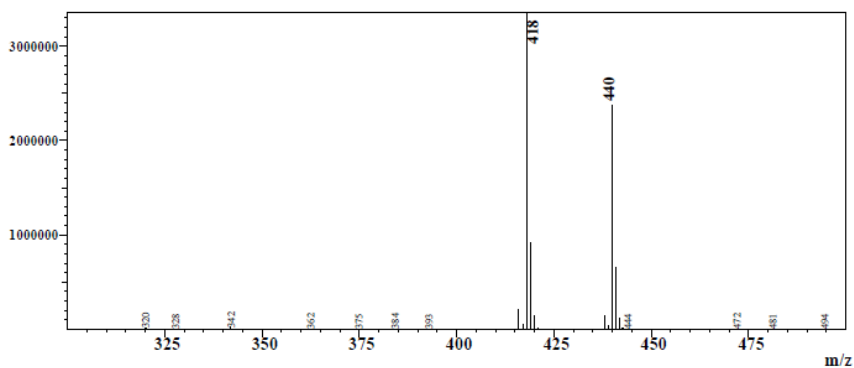

**Figure S4e:** RP-HPLC-MS and corresponding UV-Vis spectra of **L5** at  $t_R = 4.389$  min; HPLC purity 90%;  $m/z$  values for  $t_R = 3.857, 4.389$  &  $6.367$  min shows same  $m/z$ : fragmentation pattern at  $4.389$  min [ $C_{25}H_{19}FeN_3 = M$ ];  $m/z = 418$  [ $M+H$ ] $^+$  ( $C_{25}H_{20}FeN_3^+$ ),  $m/z = 440$  [ $M+Na$ ] $^+$  ( $C_{25}H_{20}FeN_3Na^+$ ).

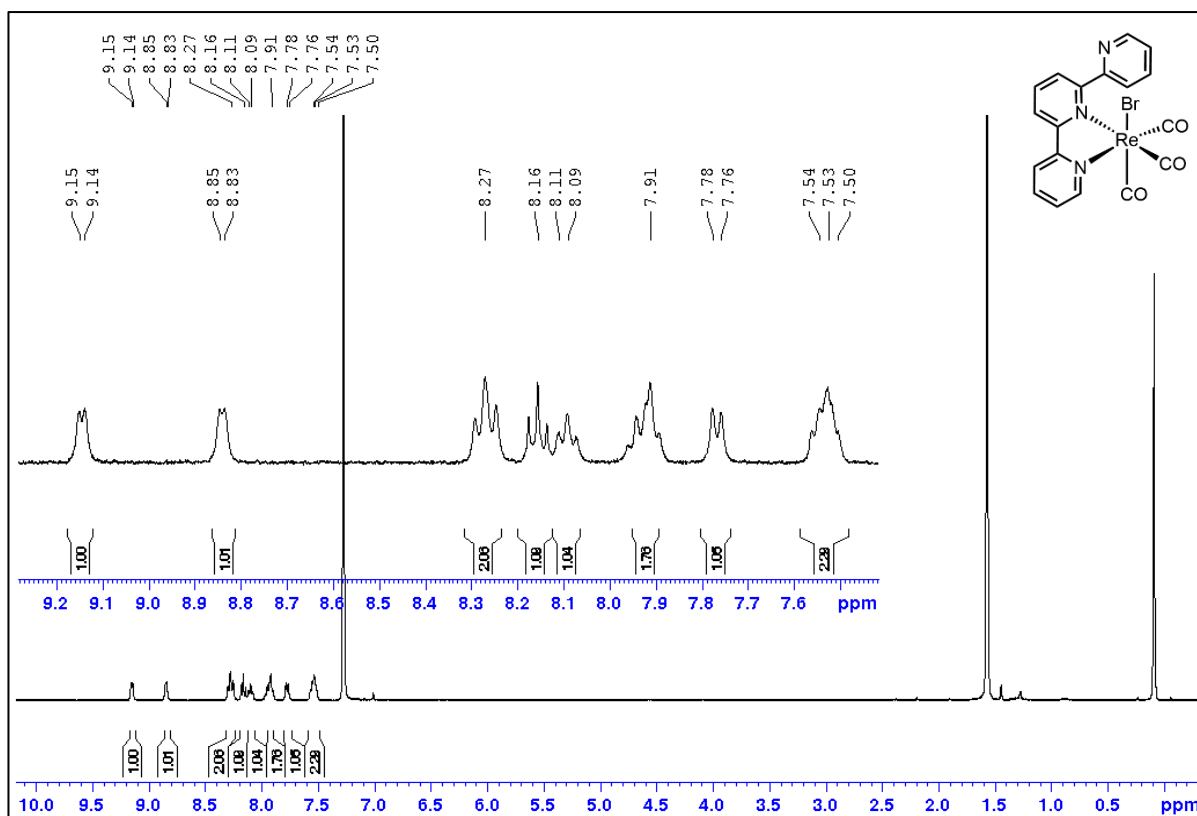

**Figure S5a:**  $^1\text{H}$  NMR spectrum of **Re1** (400 MHz,  $\text{CDCl}_3$ ) (water peak at 1.6 ppm).

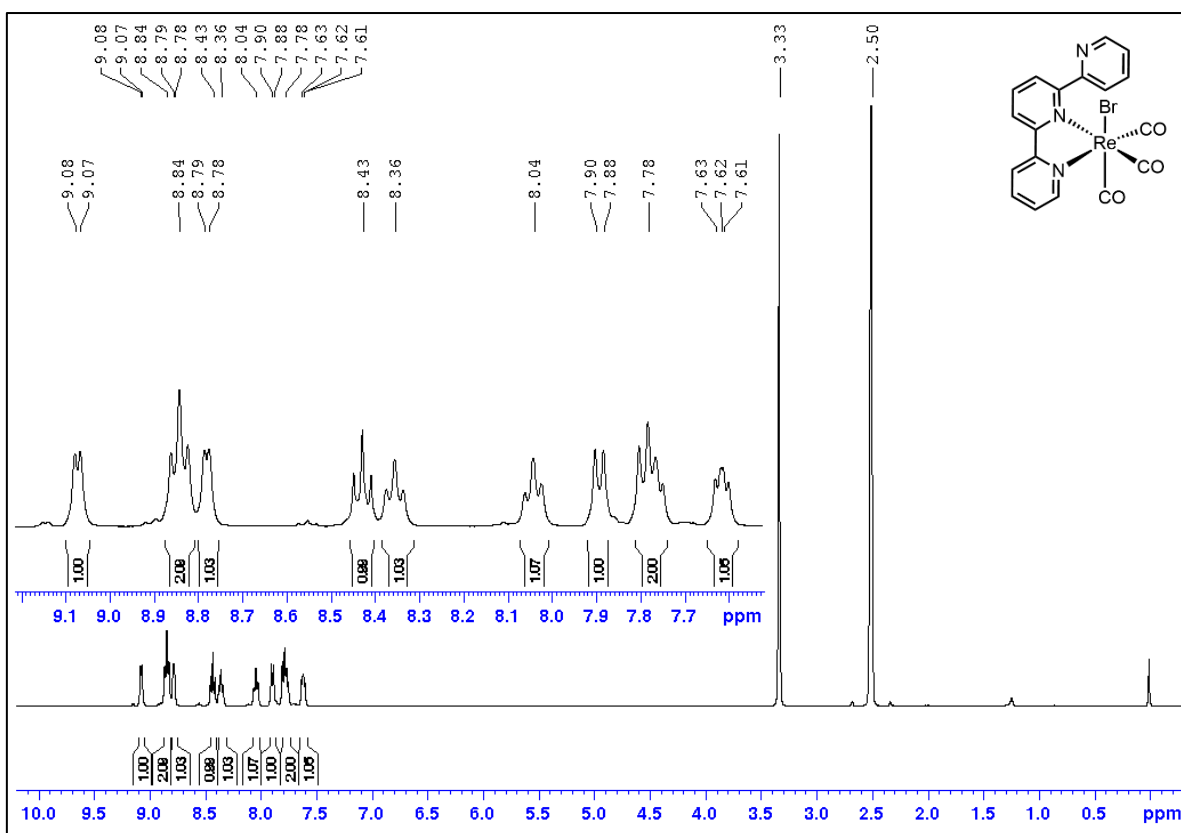

**Figure S5b:**  $^1\text{H}$  NMR spectrum of **Re1** (400 MHz,  $\text{DMSO-d}_6$ ) (water peak at 3.33 ppm).

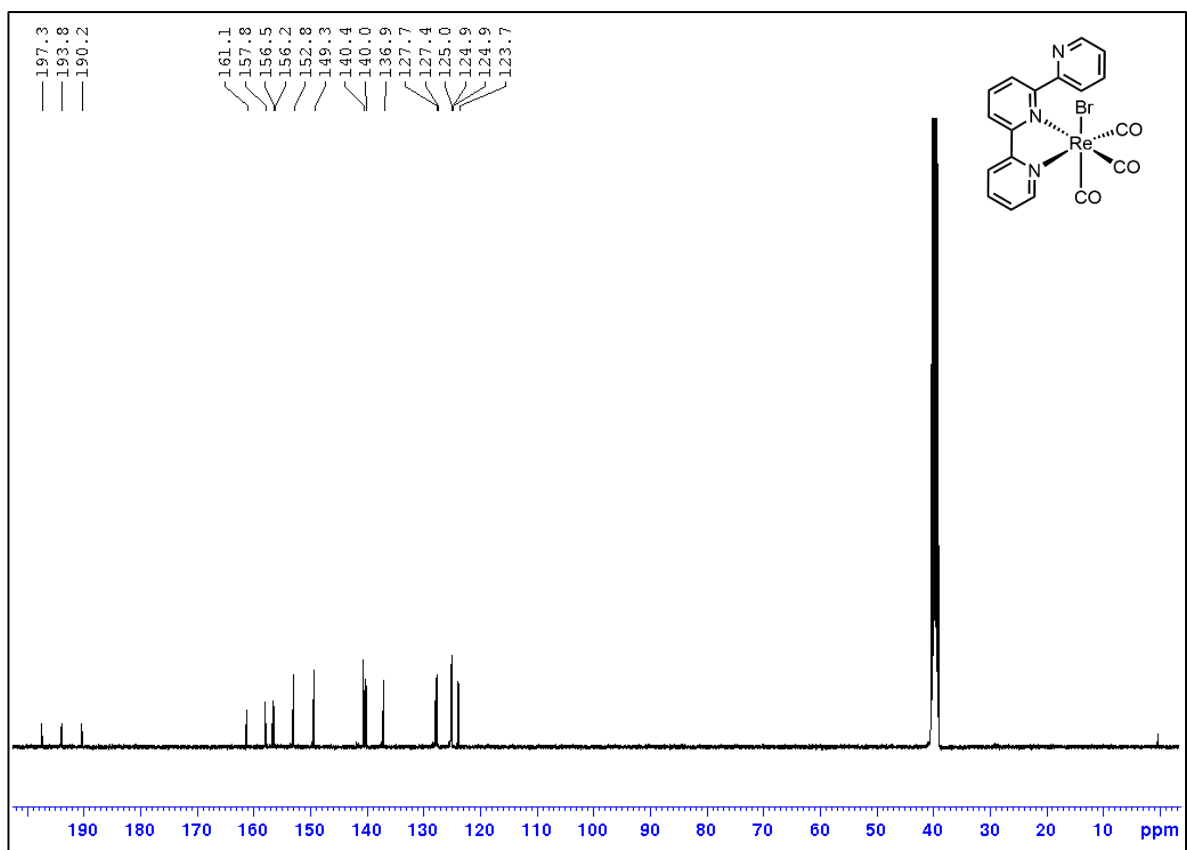

**Figure S5c:**  $^{13}\text{C}\{^1\text{H}\}$  NMR spectrum of **Re1** (101 MHz,  $\text{DMSO-}d_6$ ) with 16405 scans.

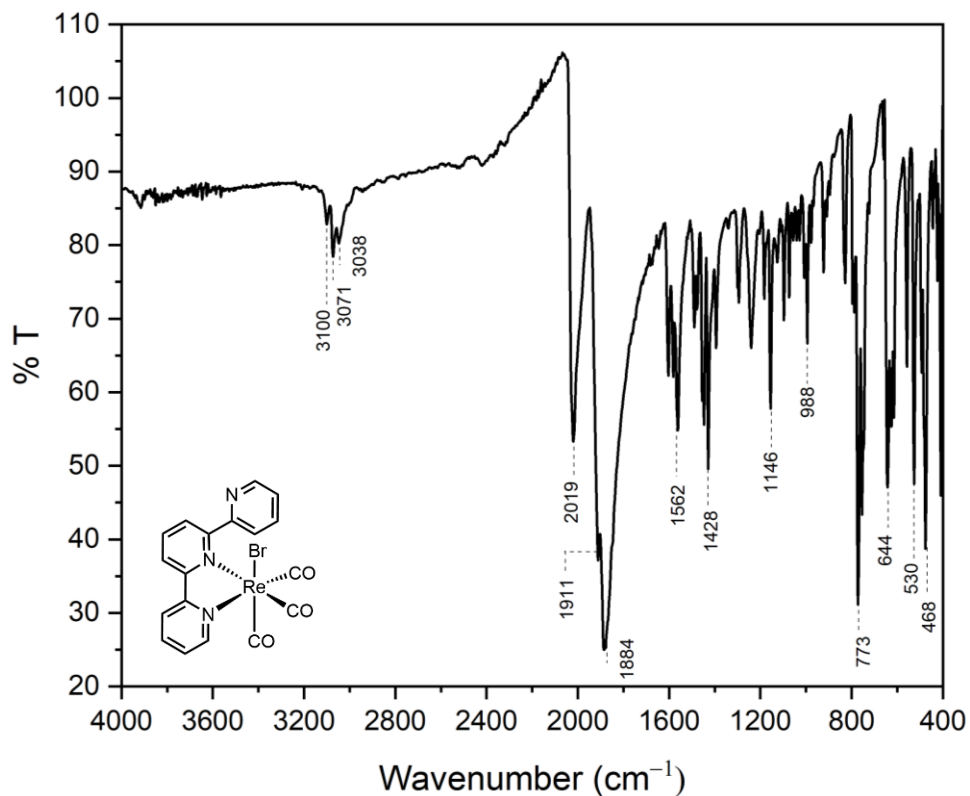

**Figure S5d:** ATR-IR spectrum of **Re1**.

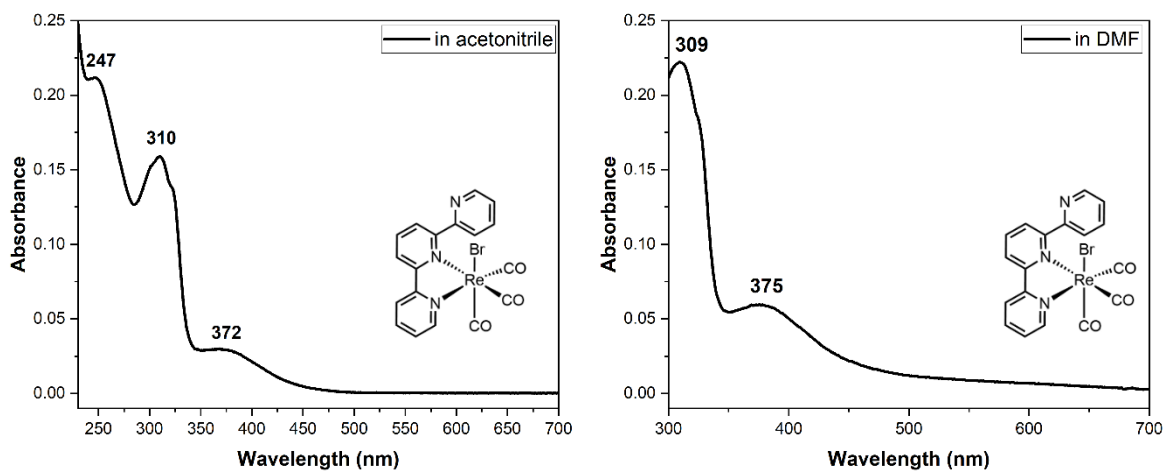

**Figure S5e:** Absorbance spectra of **Re1** (0.01 mM) in acetonitrile and DMF.

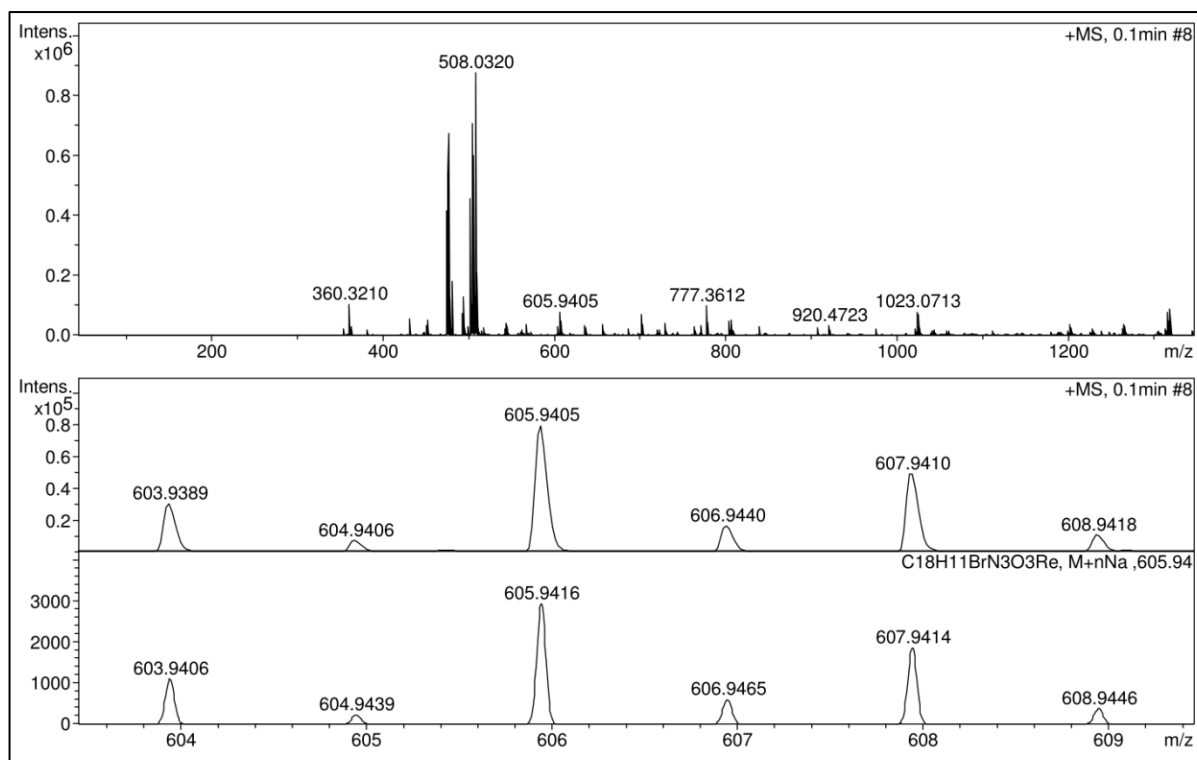

**Figure S5e:** HRMS for **Re1** [ $C_{18}H_{11}BrN_3O_3Re = M$ ] Calcd for  $[M+Na^+]$   $m/z$  605.9416 found  $m/z$  605.9405; Calcd for  $[(M-CO-Br)^+ + MeOH]$   $m/z$  508.0631 found  $m/z$  508.0320.

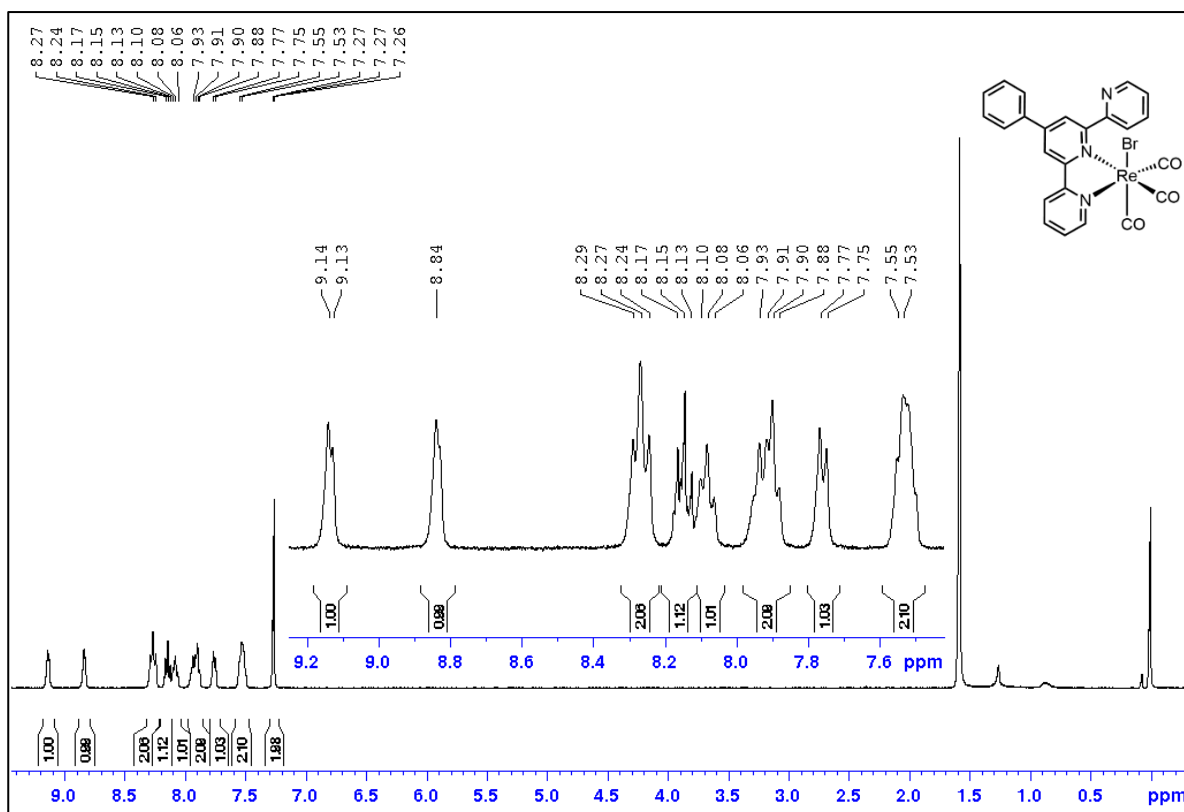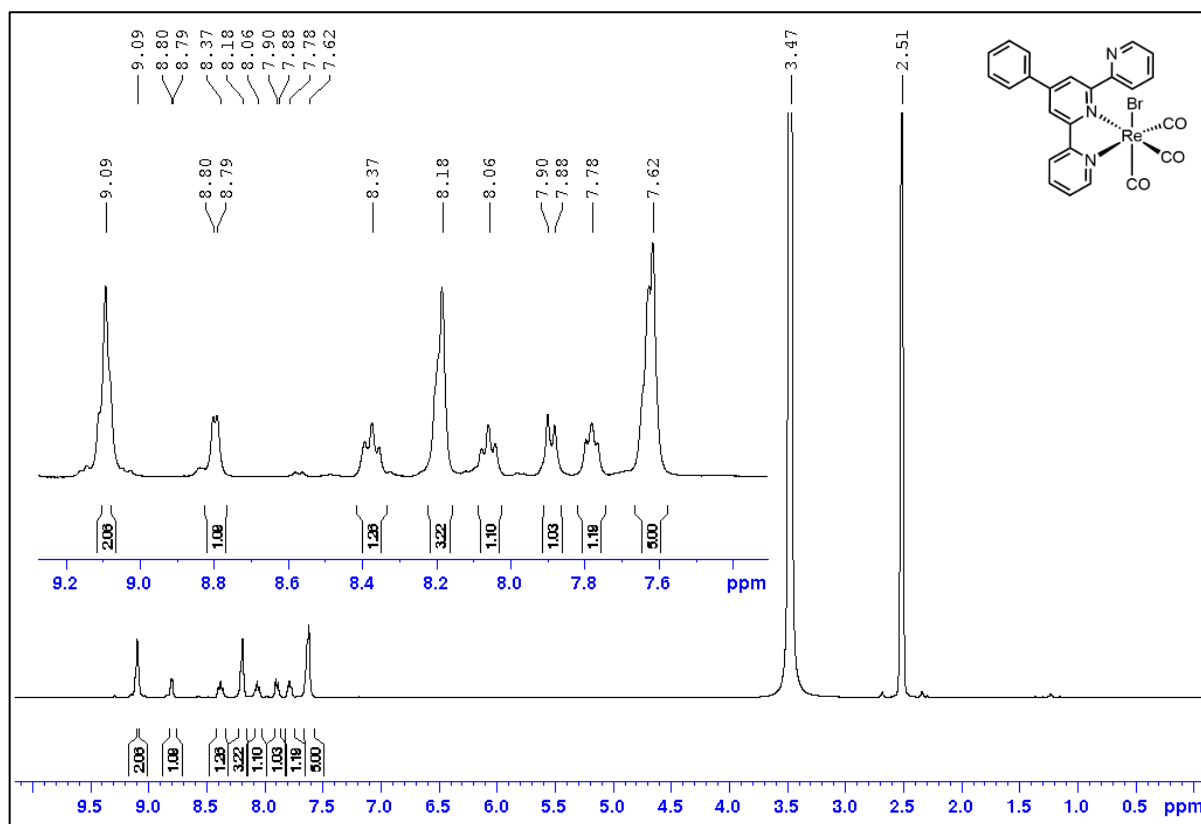

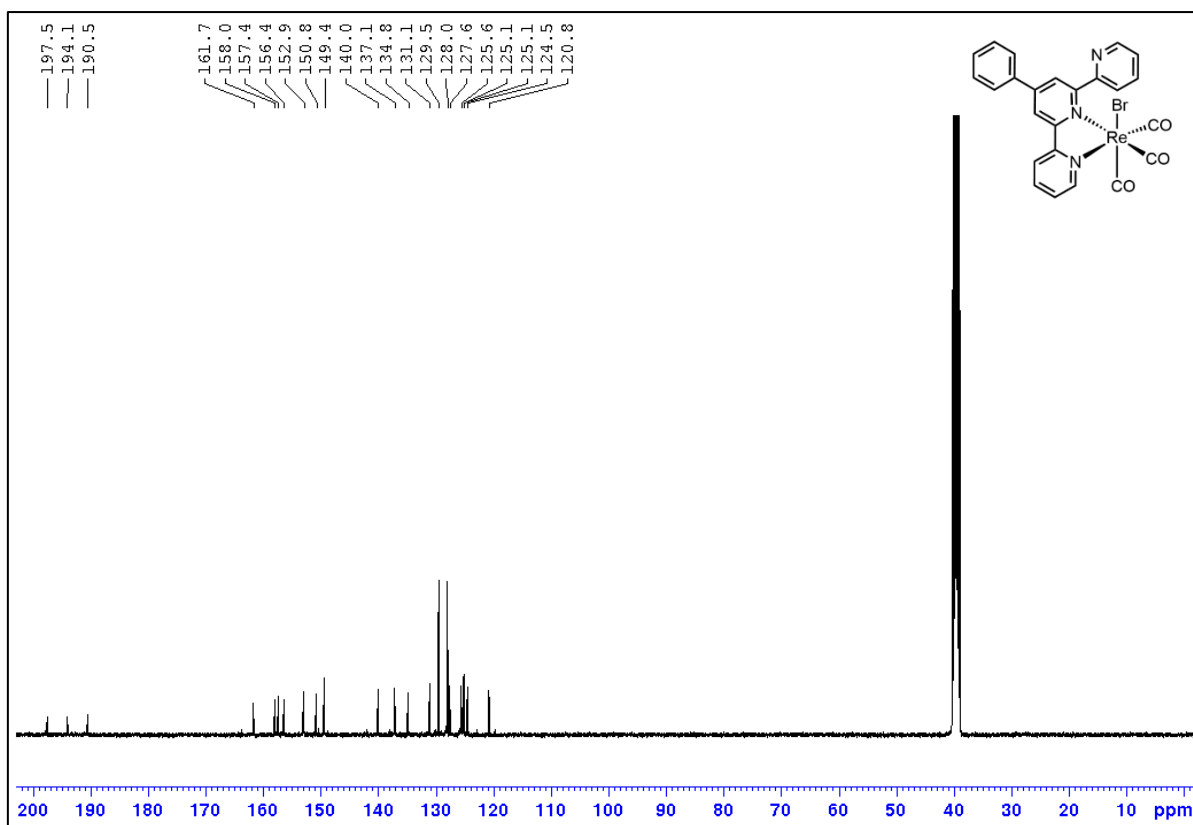

**Figure S6c:**  $^{13}\text{C}\{^1\text{H}\}$  NMR spectrum of **Re2** (101 MHz,  $\text{DMSO-d}_6$ ) with 13678 scans.



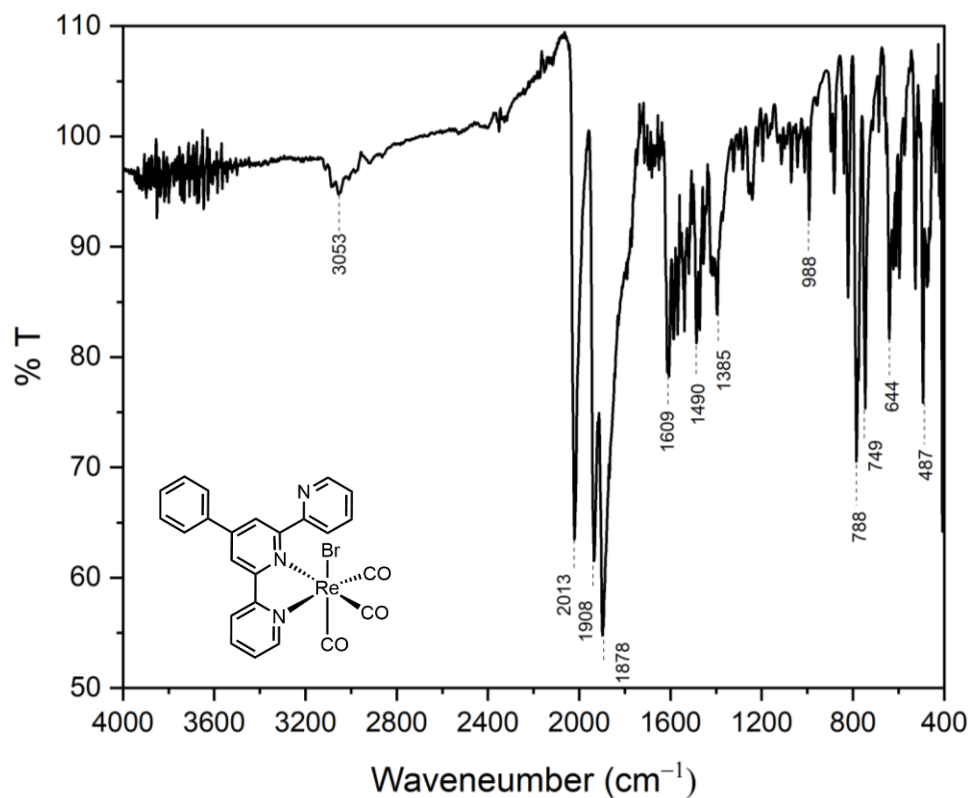

**Figure S6d:** ATR-IR spectrum of **Re2**.

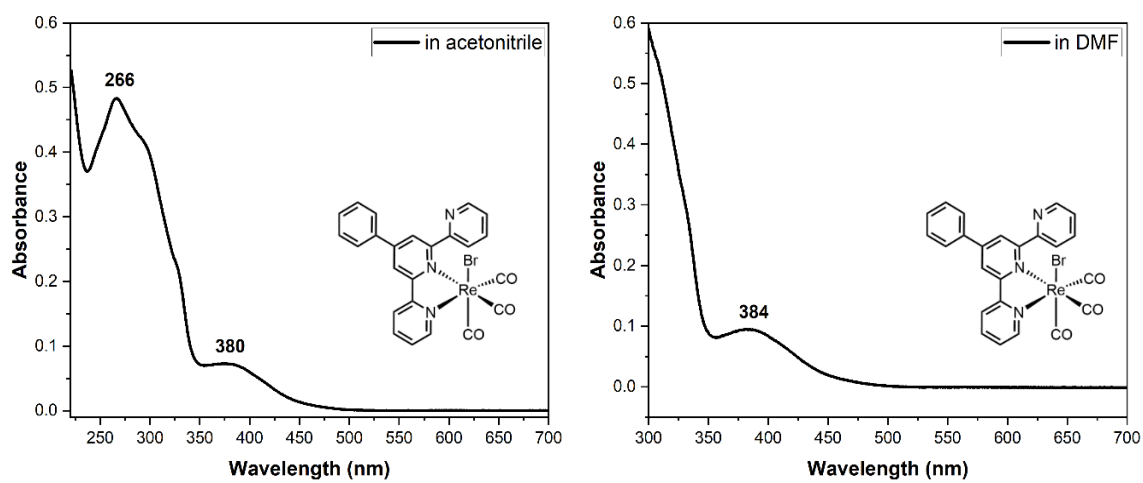

**Figure S6e:** Absorbance spectra of **Re2** (0.01 mM) in acetonitrile and DMF.

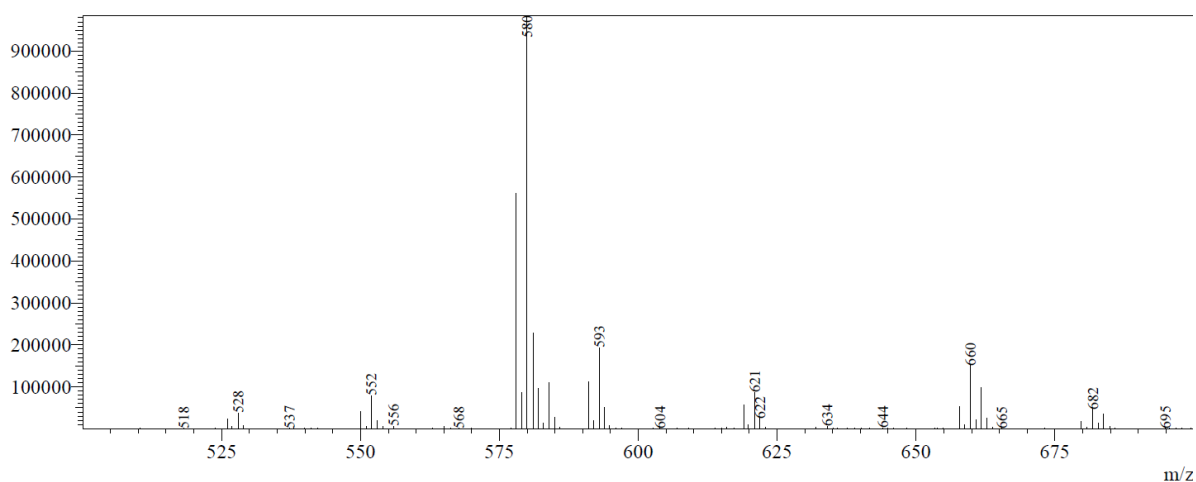

**Figure S6f:** Mass fragmentation pattern and isotopic distribution for **Re2** [ $C_{24}H_{15}BrN_3O_3Re = M$ ];  $m/z = 660 [M+H]^+$  ( $C_{24}H_{16}BrN_3O_3Re$ );  $m/z = 580 [M-Br]^+$  ( $C_{24}H_{16}N_3O_3Re$ ).

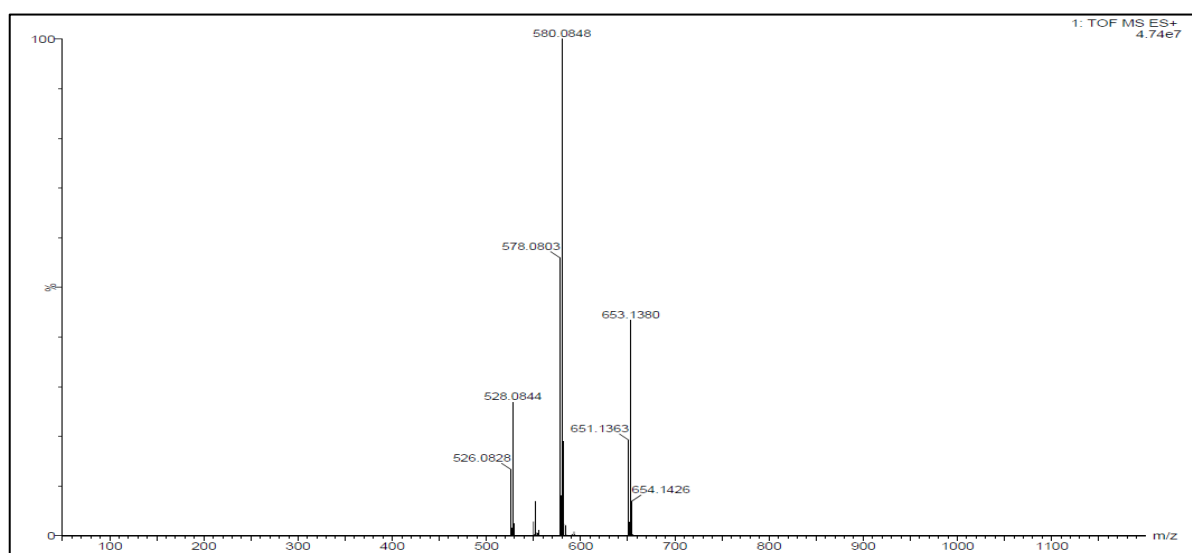

**Figure S6g:** HRMS for **Re2** [ $C_{24}H_{15}BrN_3O_3Re = M$ ]; Calcd for  $[M-CO+Na]^+$   $m/z$  653.9775 found  $m/z$  653.1380; Calcd for  $[M-Br]^+$   $m/z$  580.0643 found  $m/z$  580.0848.

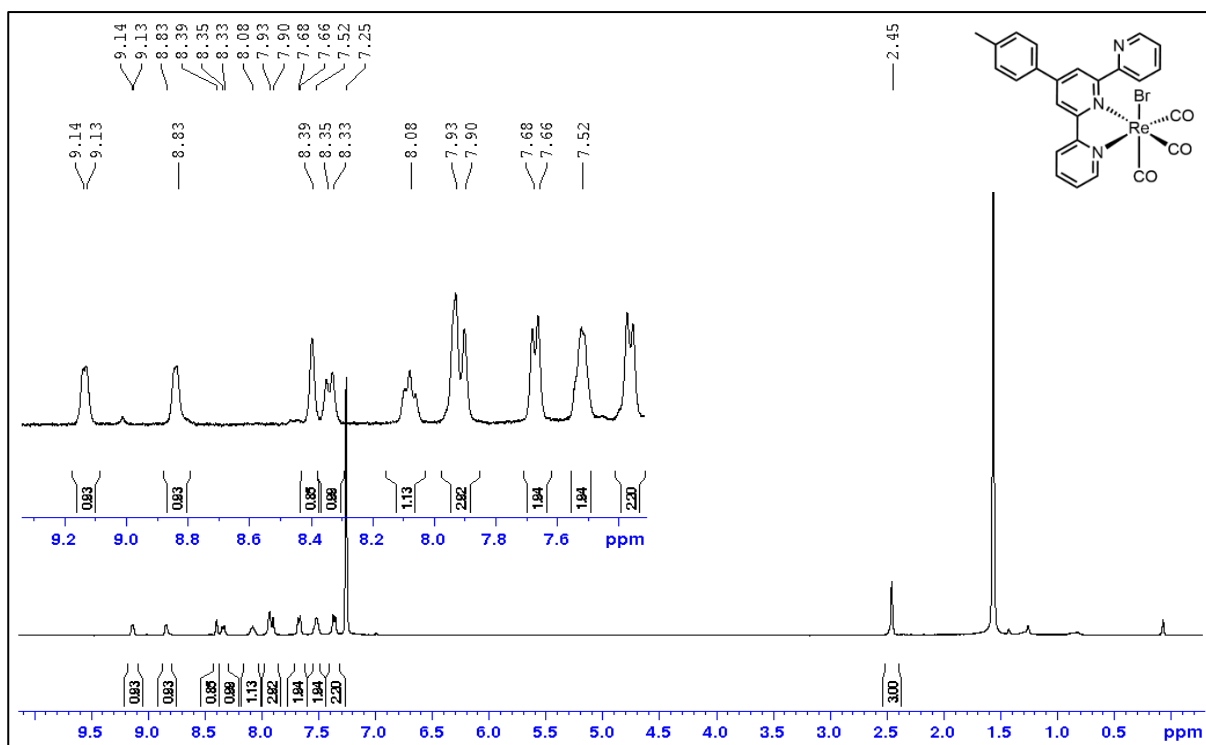

Figure S7a:  $^1\text{H}$  NMR spectrum of **Re3** (400 MHz,  $\text{CDCl}_3$ ) (water peak at 1.6 ppm).

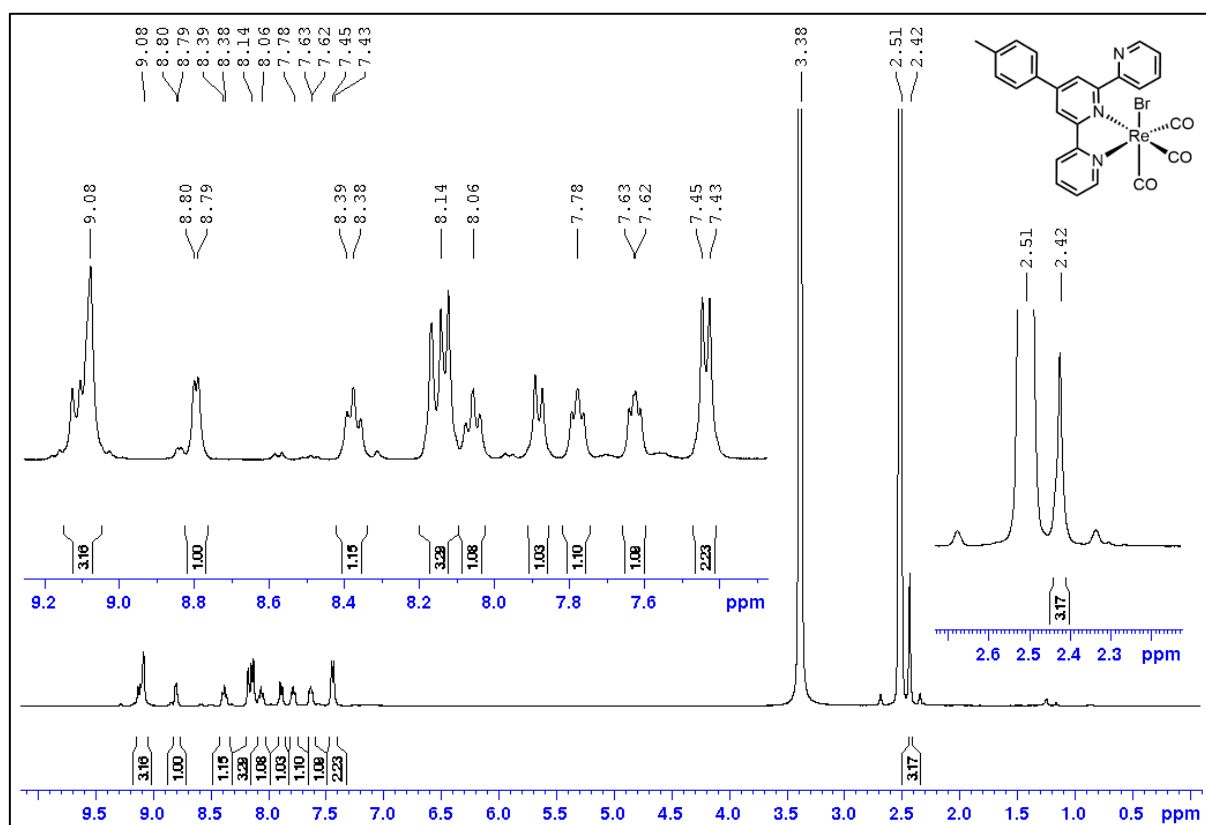

Figure S7b:  $^1\text{H}$  NMR spectrum of **Re3** (400 MHz,  $\text{DMSO}-d_6$ ) (water peak at 3.38 ppm).

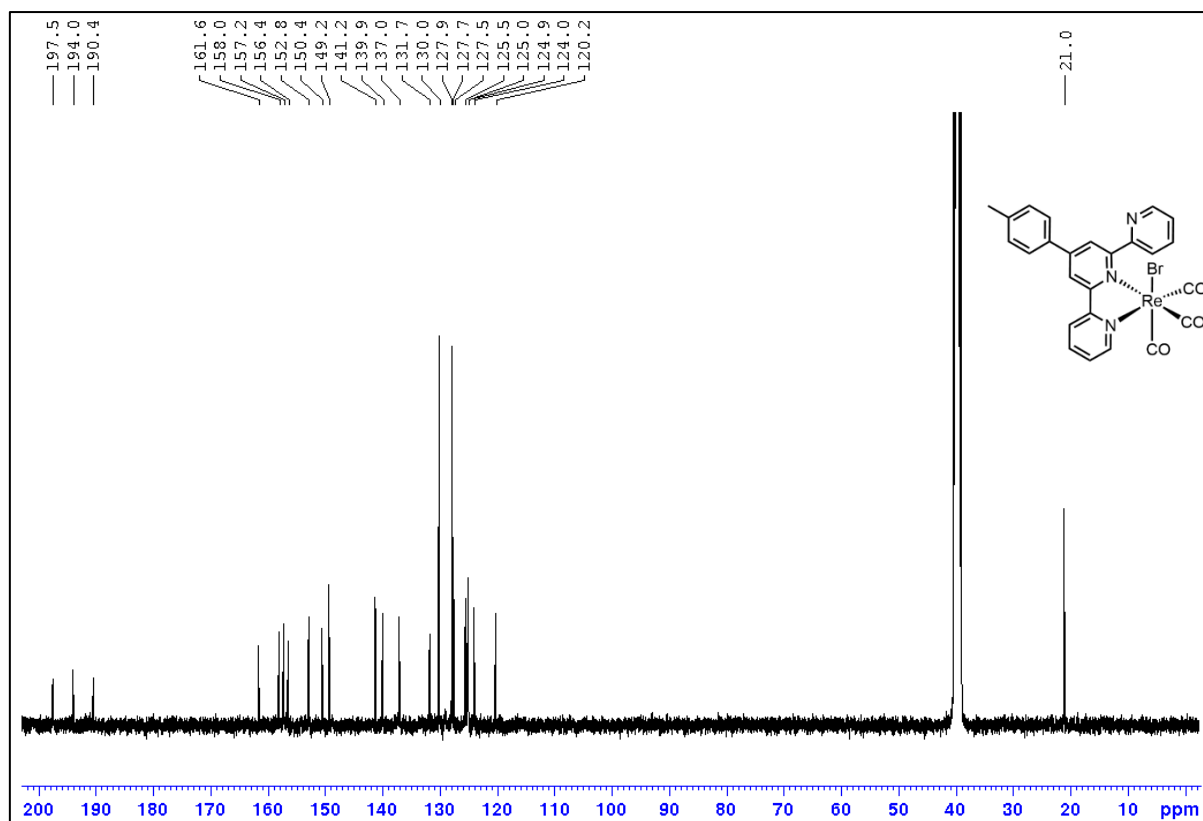

**Figure S7c:**  $^{13}\text{C}\{^1\text{H}\}$  NMR spectrum of **Re3** (101 MHz,  $\text{DMSO-d}_6$ ) with 13643 scans.

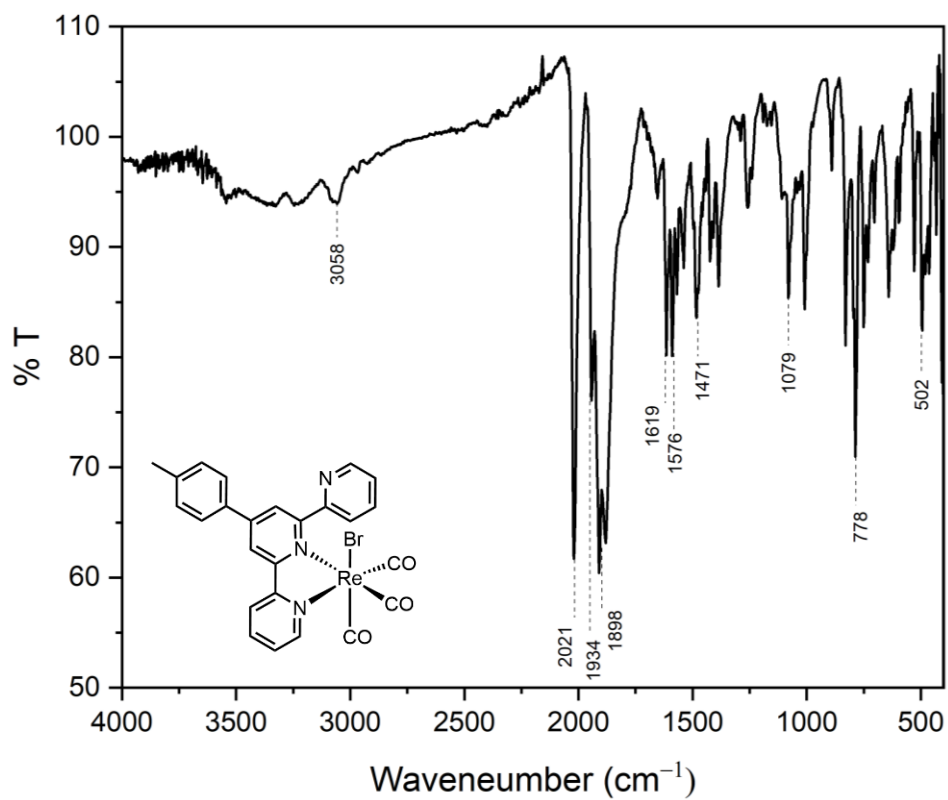

**Figure S7d:** ATR-IR spectrum of **Re3**.

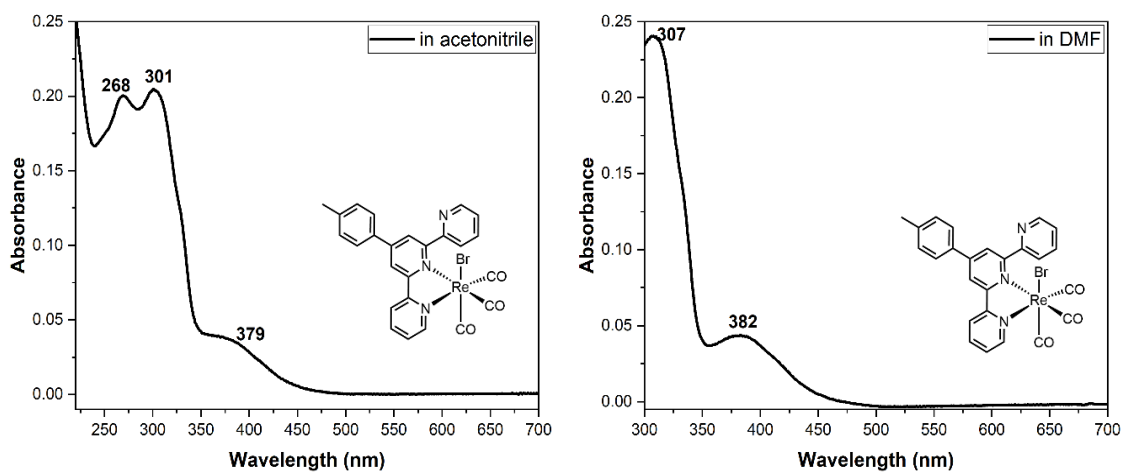

**Figure S7e:** Absorbance spectra of **Re3** (0.01 mM) in acetonitrile and DMF.

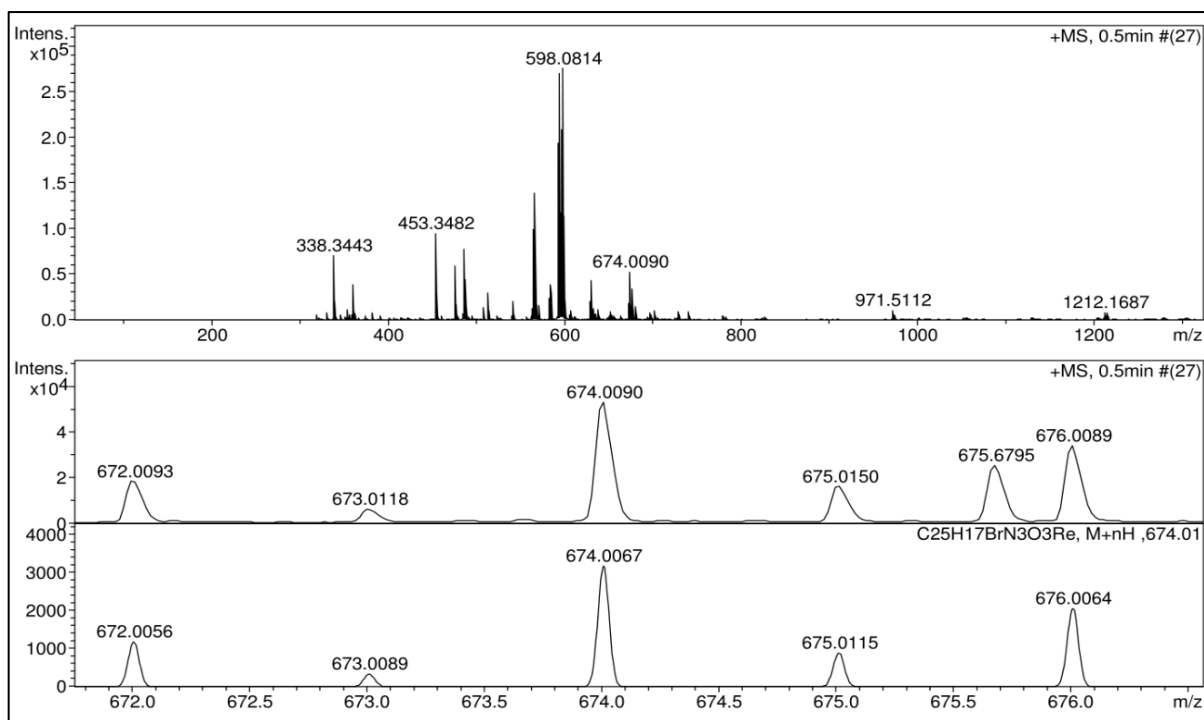

**Figure S7f:** HRMS for **Re3** [ $C_{25}H_{17}BrN_3O_3Re = M$ ]; Calcd for  $[M+H]^+$   $m/z = 674.0055$  ( $C_{25}H_{18}^{79}BrN_3O_3Re$ ) found  $m/z = 674.0090$ ; Calcd for  $[(M-CO-Br)^+ + MeOH]$   $m/z = 598.1112$  found  $m/z = 598.0814$ .

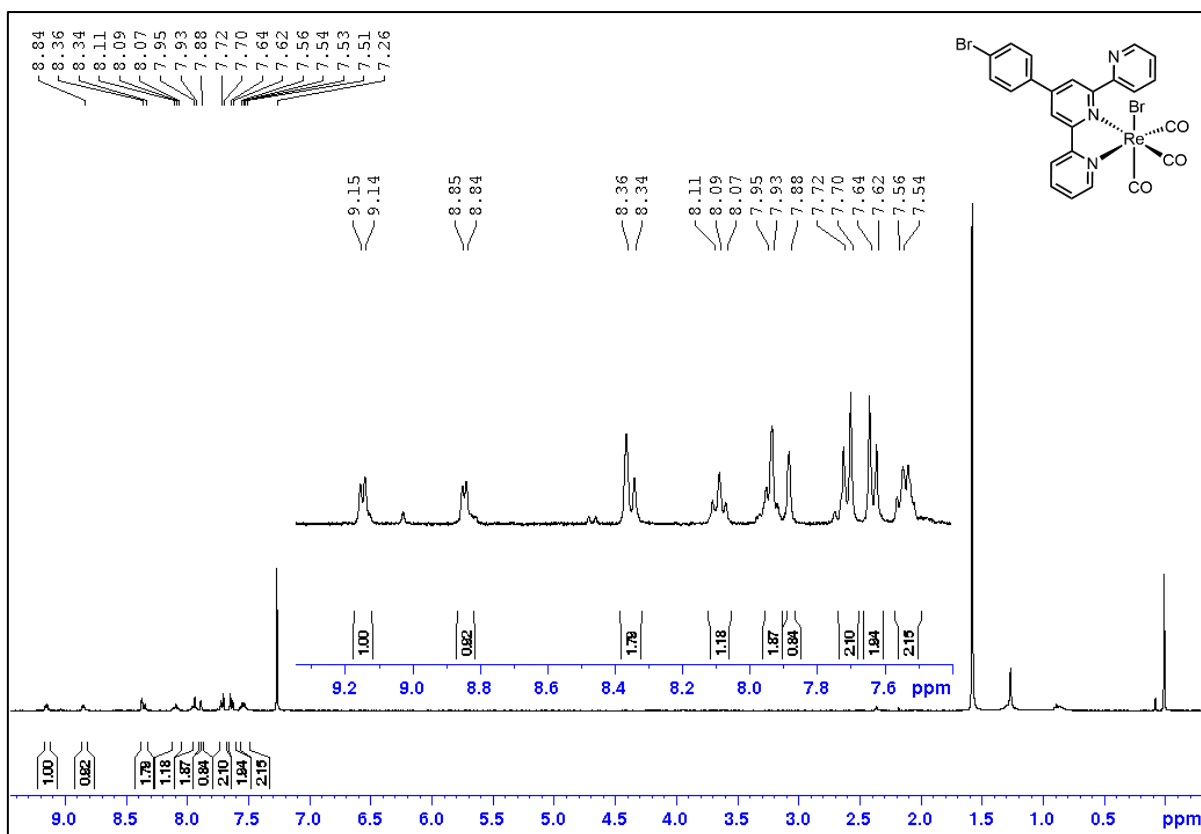

**Figure S8a:**  $^1\text{H}$  NMR spectrum of **Re4** (500 MHz,  $\text{CDCl}_3$ ) (water peak at 1.6 ppm).

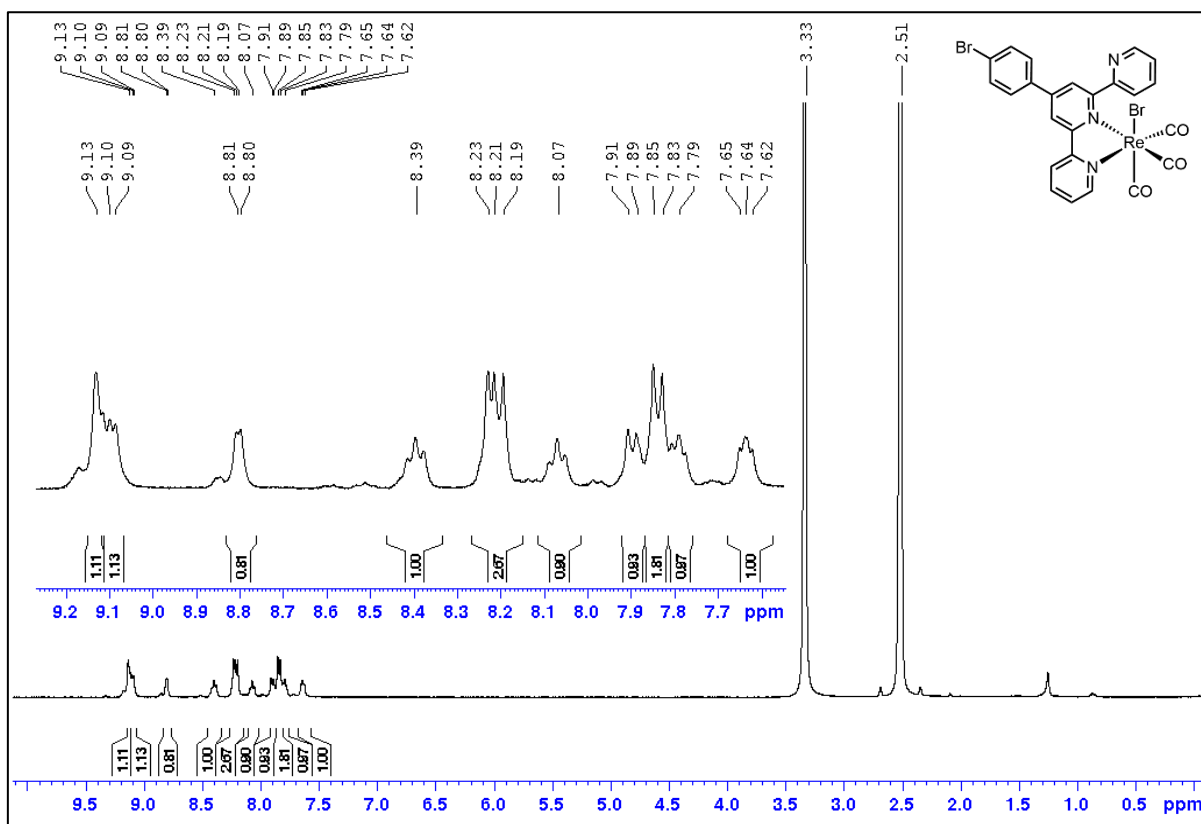

**Figure S8b:**  $^1\text{H}$  NMR spectrum of **Re4** (400 MHz,  $\text{DMSO}-d_6$ ) (water peak at 3.33 ppm).

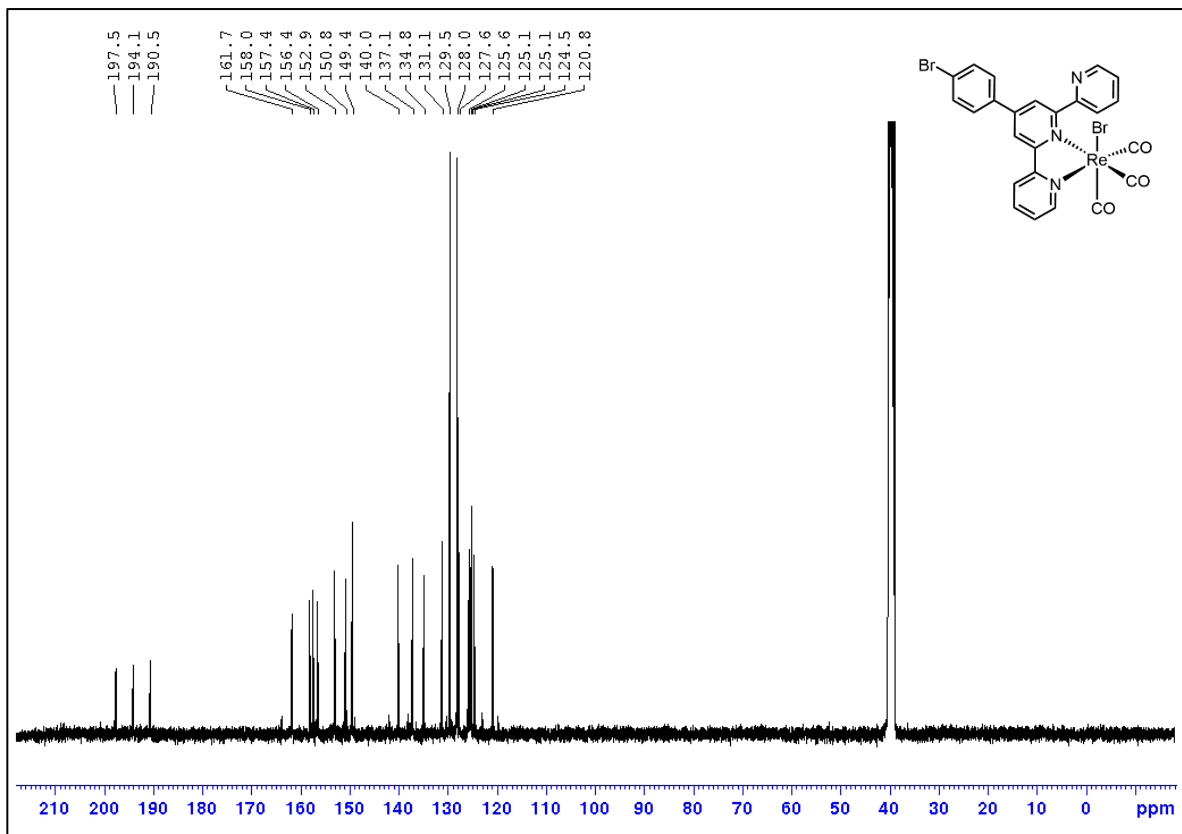

**Figure S8c:**  $^{13}\text{C}\{^1\text{H}\}$  NMR spectrum of **Re4** (101 MHz,  $\text{DMSO-}d_6$ ) with 11100 scans.



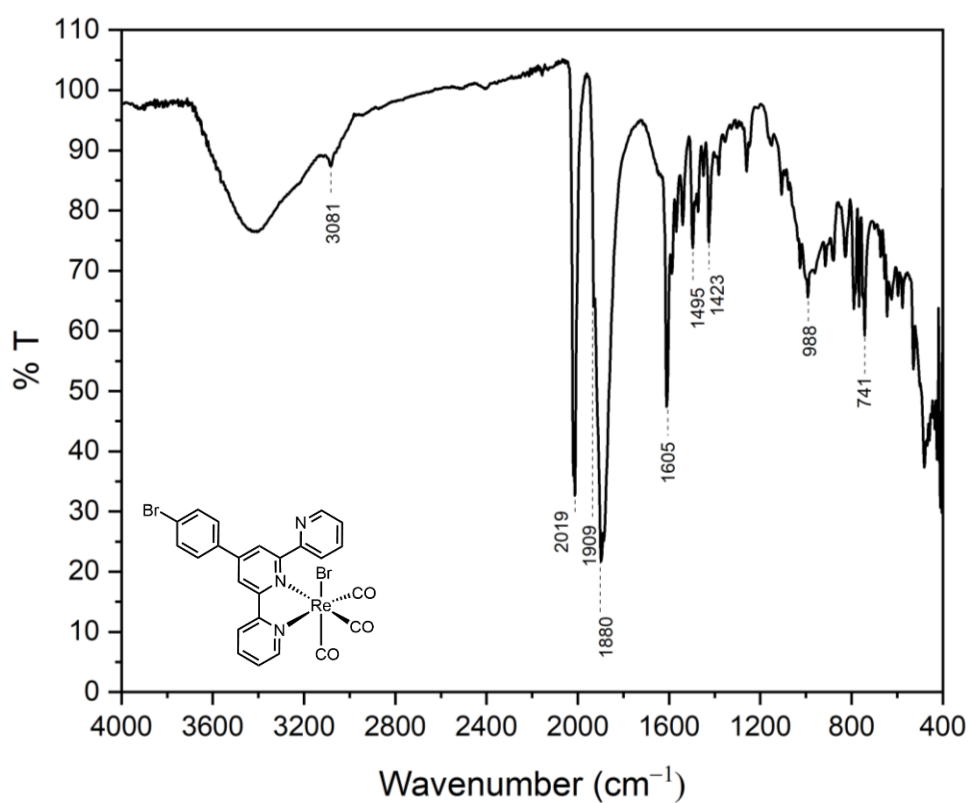

**Figure S8d:** ATR-IR spectrum of **Re4**.

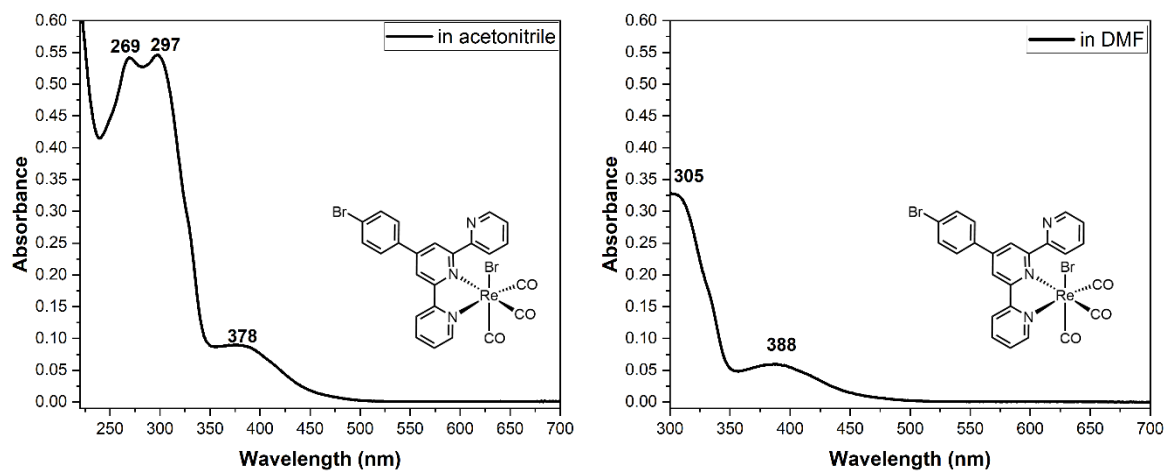

**Figure S8e:** Absorbance spectra of **Re4** (0.01 mM) in acetonitrile and DMF.

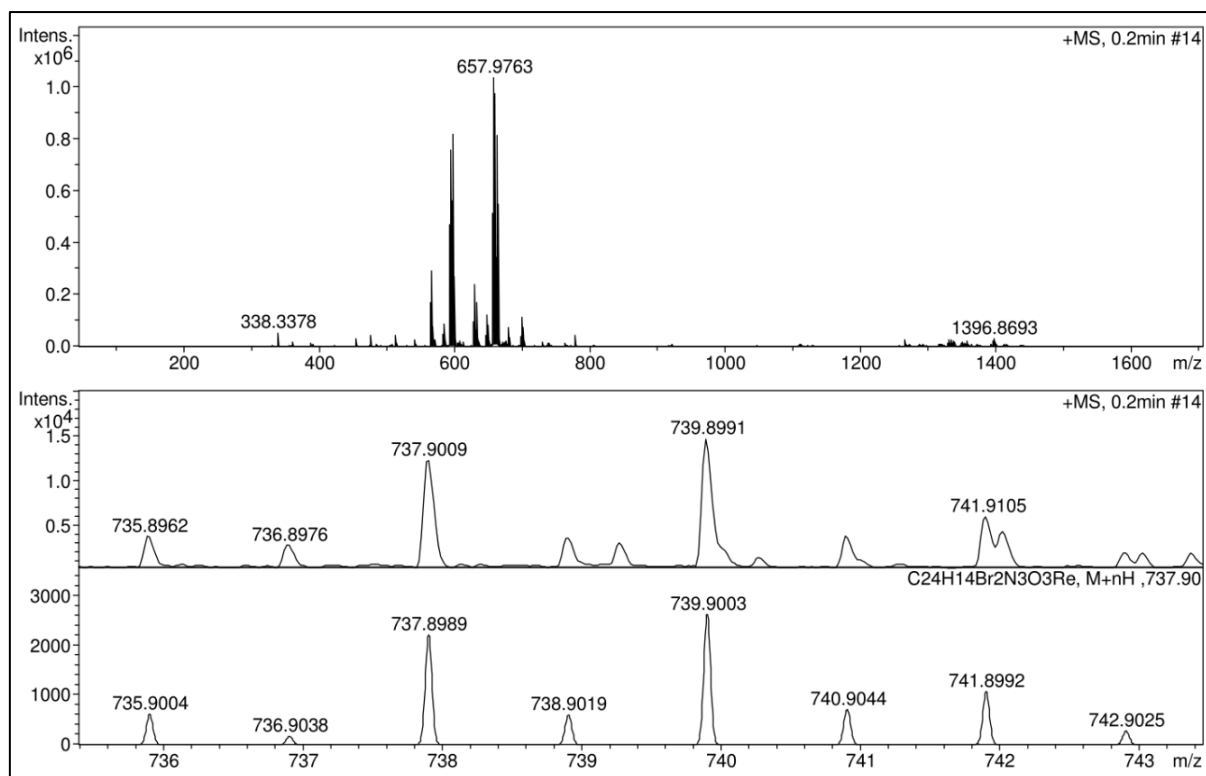

**Figure S8f:** HRMS for **Re4** [ $C_{24}H_{14}Br_2N_3O_3Re = M$ ] Calcd for  $[M+H]^+$   $m/z = 739.9004$  ( $C_{25}H_{18}^{81}Br_2N_3O_3Re$ ) found  $m/z = 739.8991$ ; Calcd for  $[(M-Br)^+]$   $m/z = 657.9748$  found  $m/z = 657.9763$ .

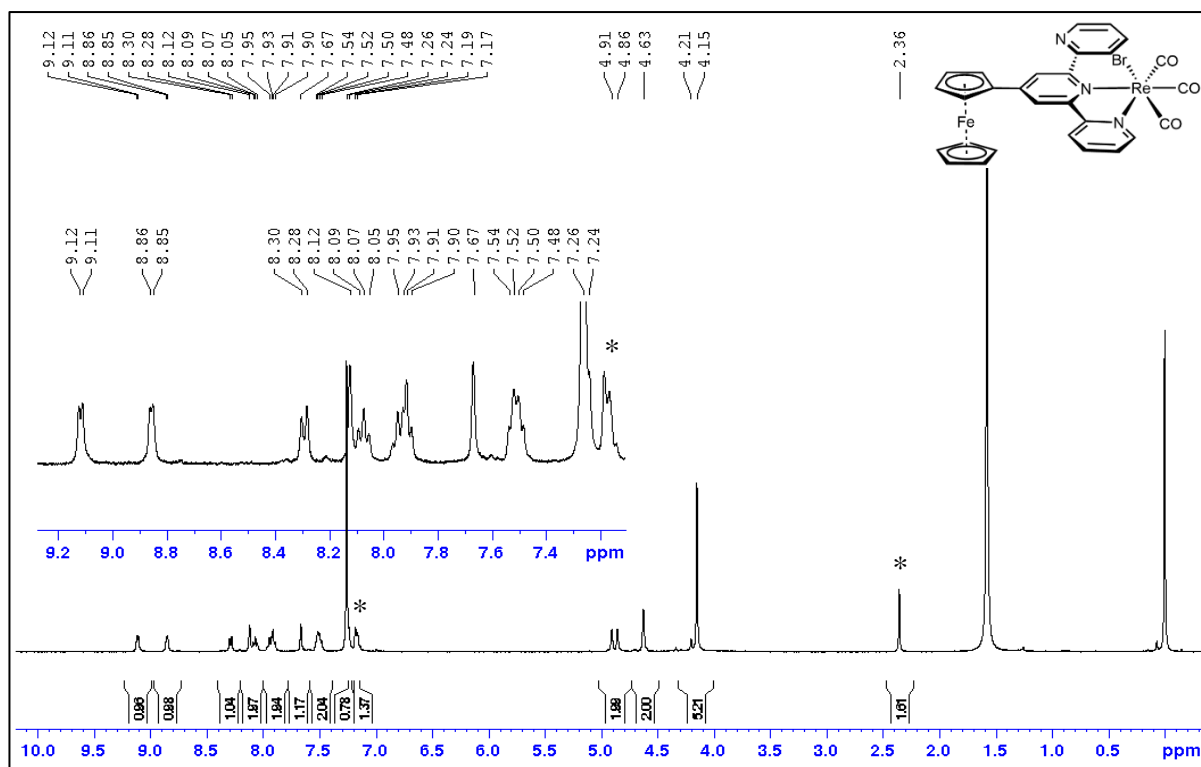

**Figure S9a:**  $^1\text{H}$  NMR spectrum of **Re5** (400 MHz,  $\text{CDCl}_3$ ) (water peak at 1.6 ppm) toluene peaks marked with \*; observed at 7.24, 7.18 & 2.36 ppm; reported<sup>3</sup> at 7.25, 7.17 & 2.36 ppm.

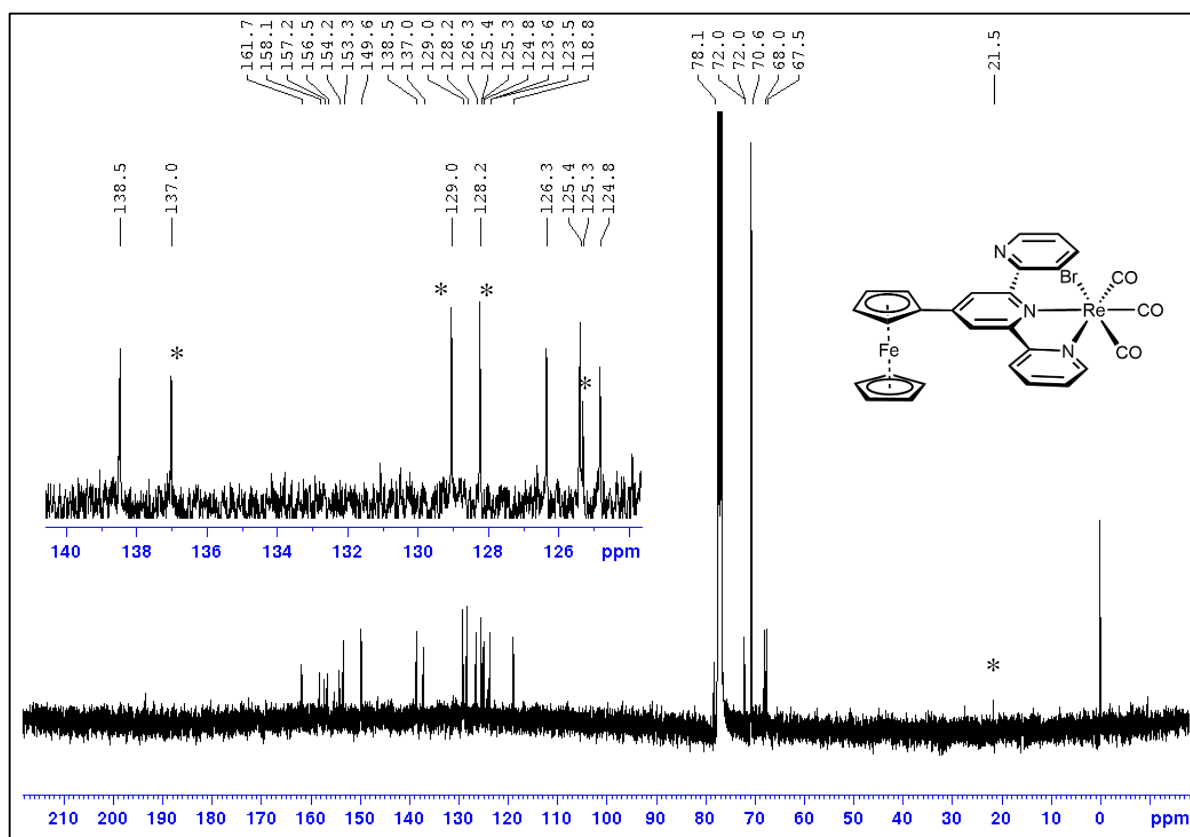

**Figure S9b:**  $^{13}\text{C}\{^1\text{H}\}$  NMR spectrum of **Re5** (101 MHz,  $\text{CDCl}_3$ ), with 15879 scans. The  $^{13}\text{C}$  peaks for CO were not observed even with longer scans; toluene peaks marked with \*; observed at 137.9, 129.1, 128.3, 125.3 & 21.5 ppm; reported<sup>3</sup> at 137.0, 129.0, 128.2, 125.3 & 21.5 ppm.

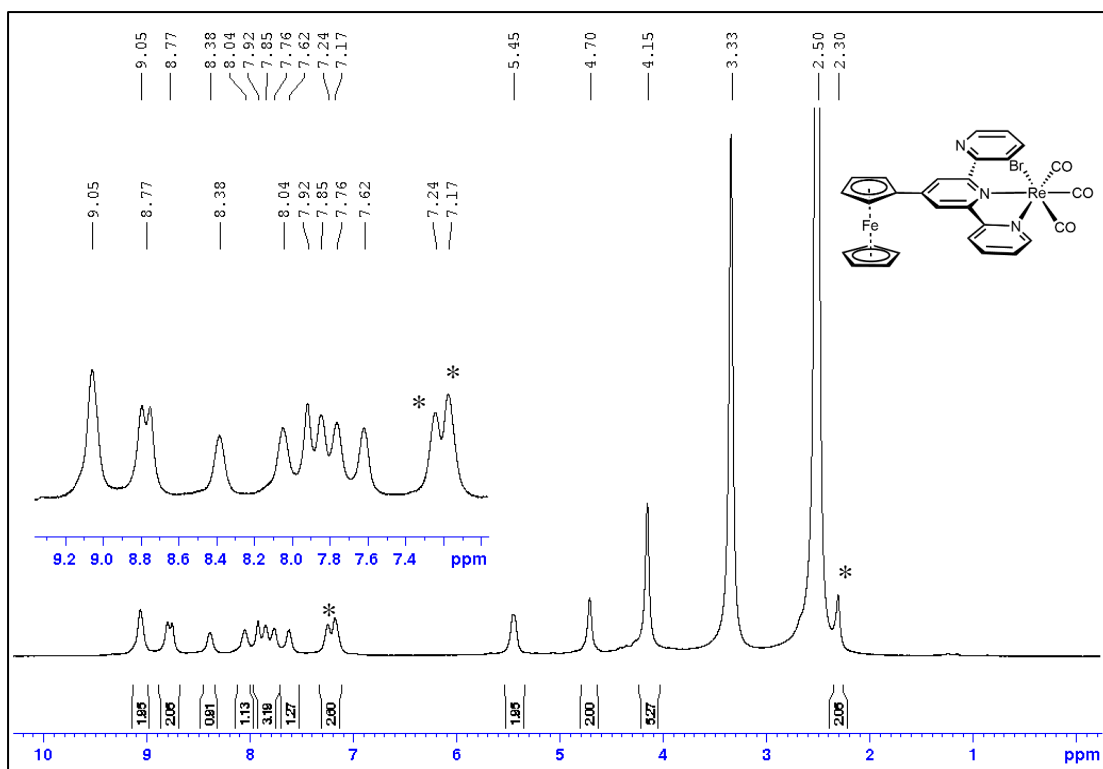

**Figure S9c:**  $^1\text{H}$  NMR spectrum of **Re5** (400 MHz,  $\text{DMSO-d}_6$ ) (water peak at 3.33 ppm); toluene peaks marked with \*; observed at 7.24, 7.17 & 2.30 ppm; reported<sup>3</sup> at 7.25, 7.18 & 2.30 ppm.

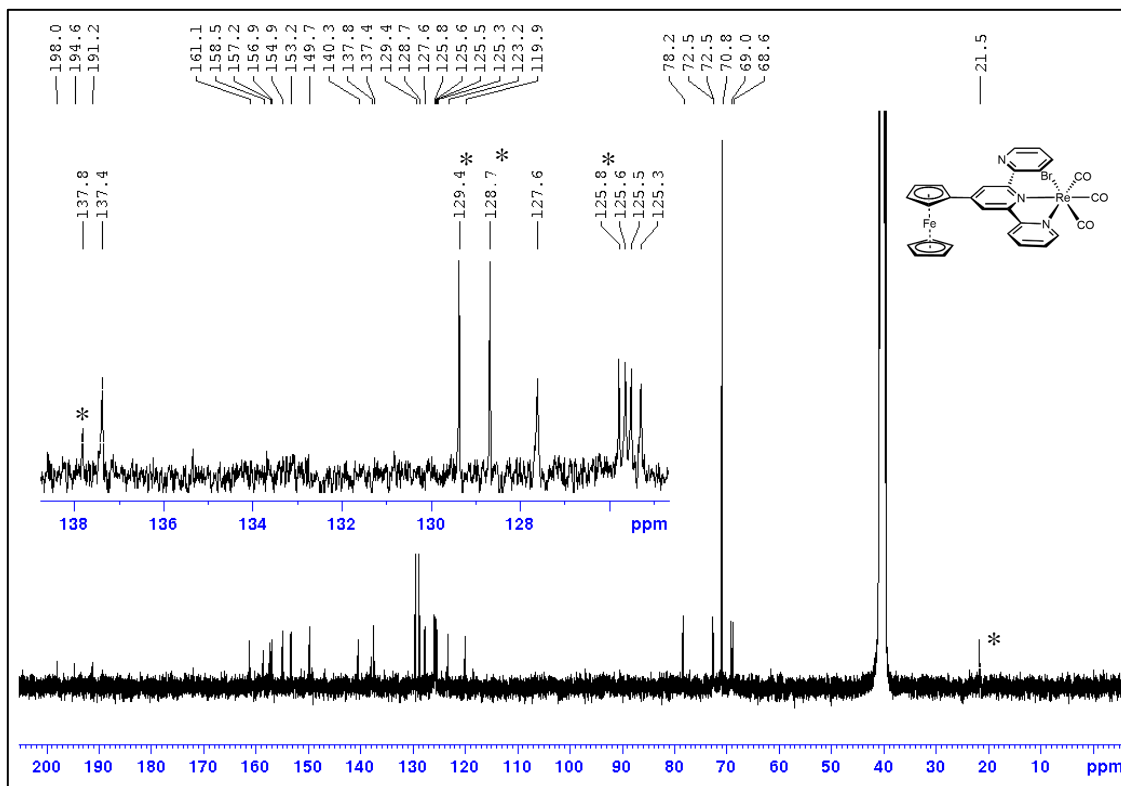

**Figure S9d:**  $^{13}\text{C}\{^1\text{H}\}$  NMR spectrum of **Re5** (101 MHz,  $\text{DMSO-d}_6$ ) with 1024 scans; toluene peaks marked with \*; observed at 137.8, 129.4, 128.7, 125.8 & 21.5 ppm; reported<sup>3</sup> at 137.4, 128.9, 128.2, 125.3 & 21.0 ppm.

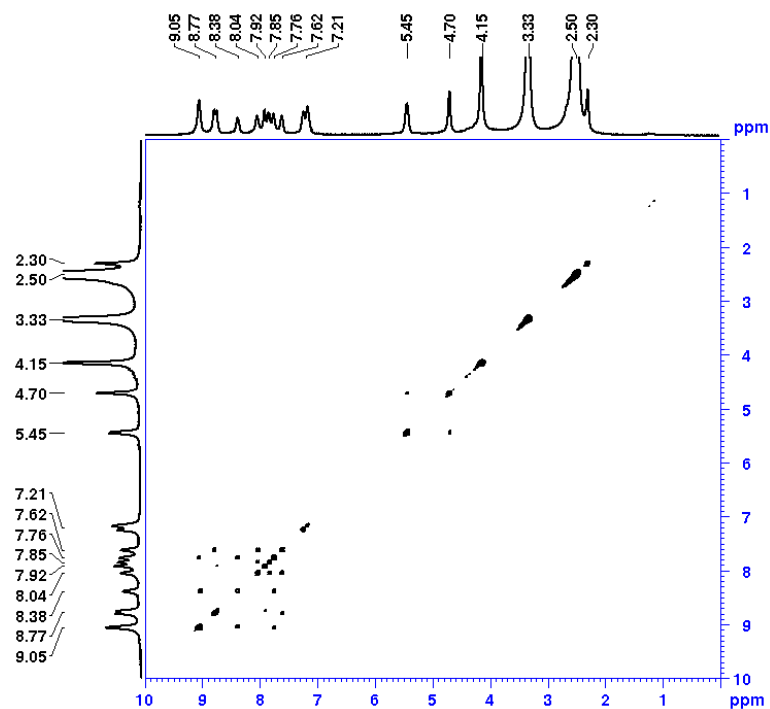

**Figure S9e:** COSY spectra of *Re5* (DMSO-*d*<sub>6</sub>).

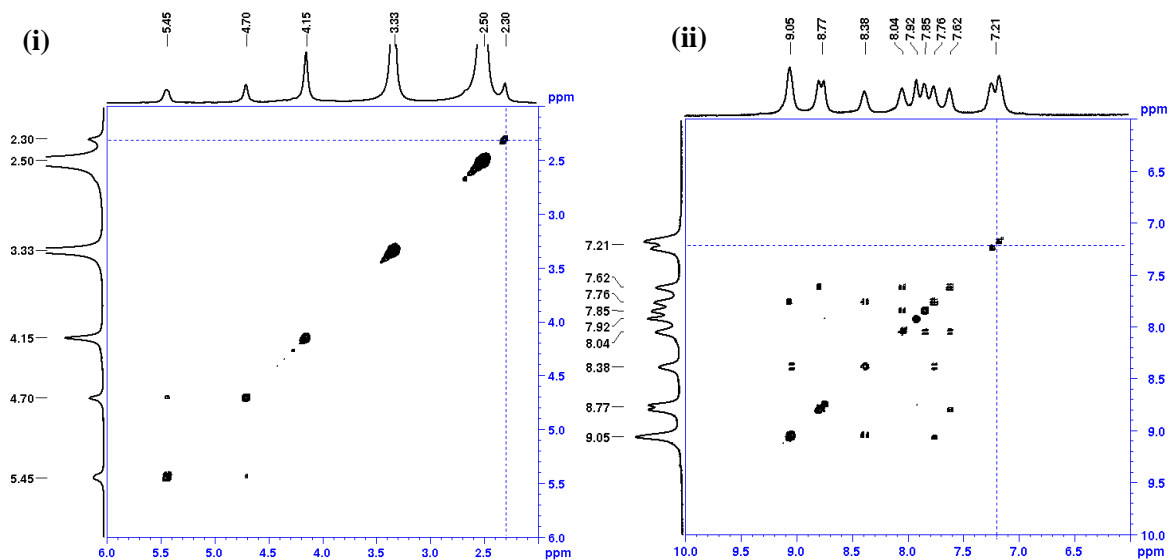

**Figure S9f:** (i) Section of COSY spectra (0-6 ppm) shows the -CH<sub>3</sub> peak of toluene, with no correlation to any other protons; (ii) Section of COSY spectra (6-10 ppm) shows the aromatic protons of toluene, having no correlation with any other aromatic peaks of the complex.

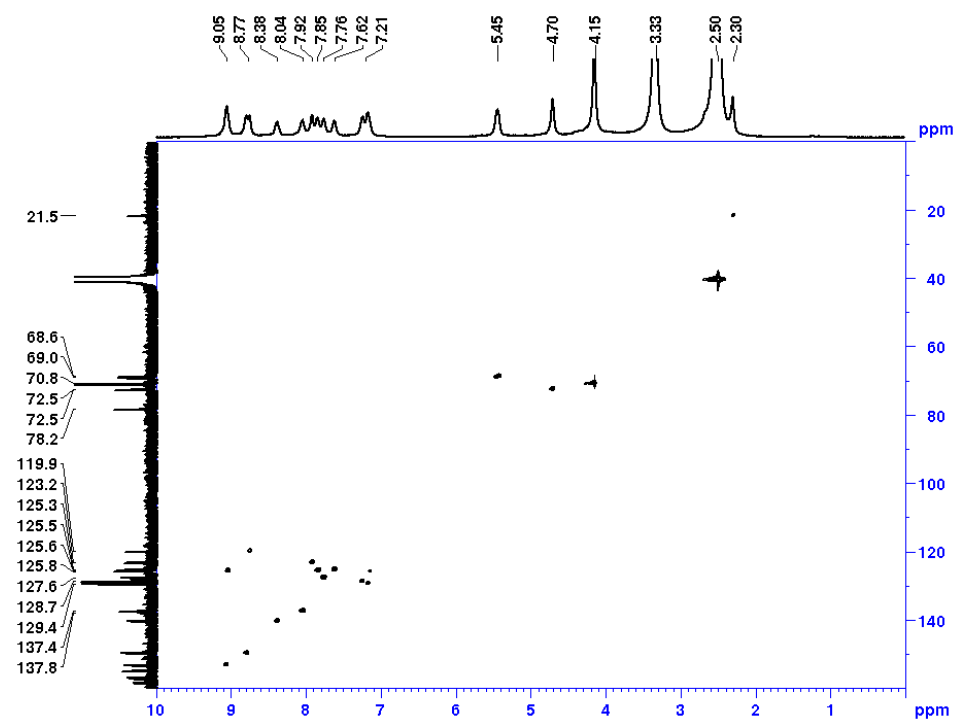

**Figure S9g:** HSQC spectra of **Re5** (DMSO- $d_6$ ).

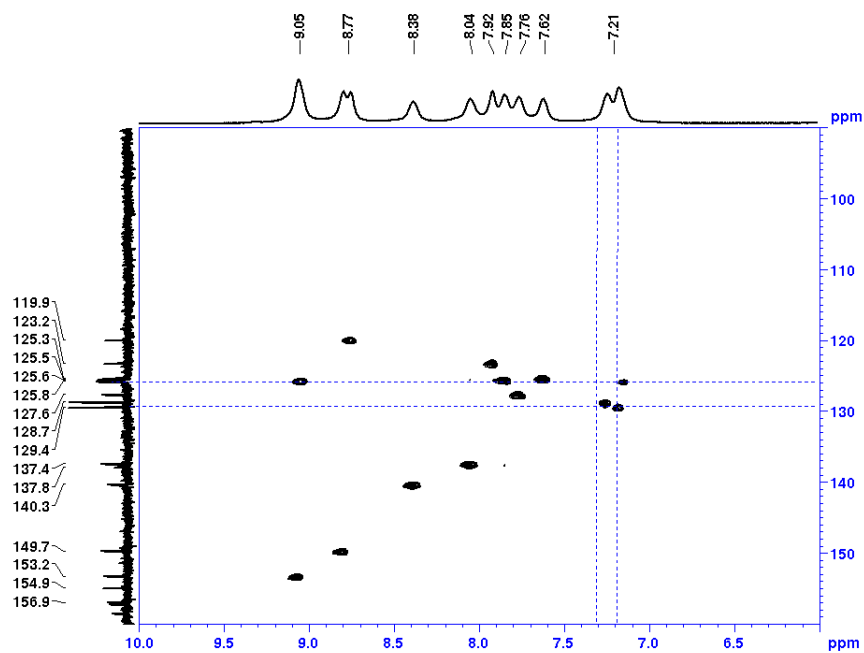

**Figure S9h:** HSQC spectra of the aromatic region shows three  $^{13}\text{C}$  correlated with the protons at 7.21 ppm, which are characteristic of toluene<sup>3</sup>.

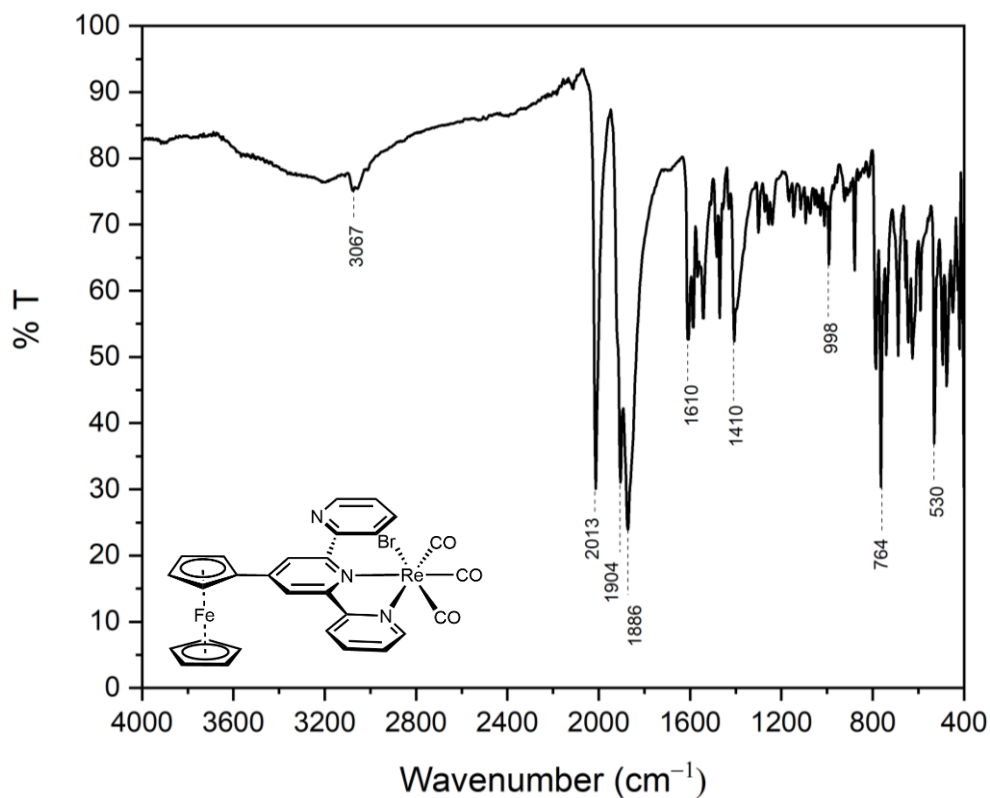

**Figure S9i:** ATR-IR spectrum of **Re5**.

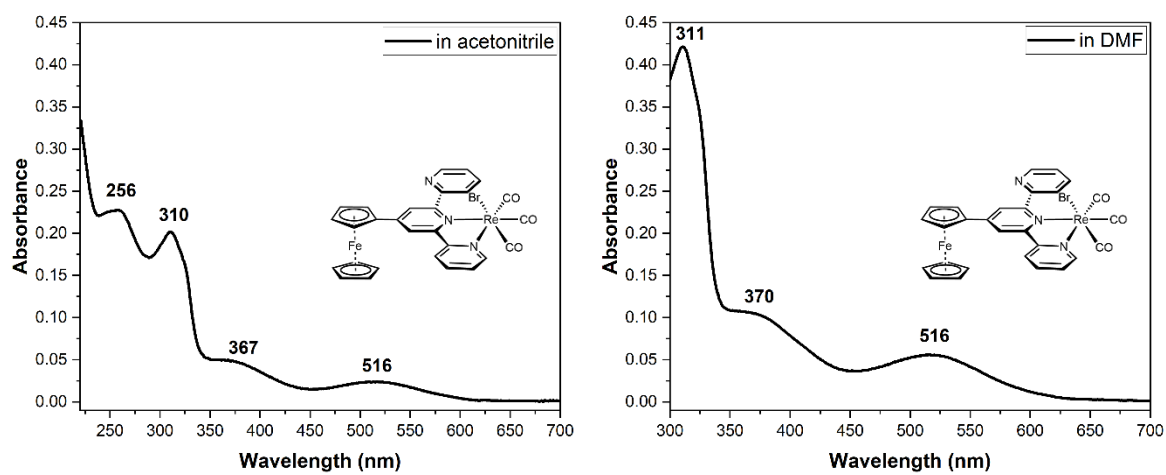

**Figure S9j:** Absorbance spectra of **Re5** (0.01 mM) in acetonitrile and DMF.

## <Sample Information>

Sample Name : Re5  
 Sample ID : Re5  
 Data Filename : Re5\_27-03-2023\_003.lcd  
 Method Filename : C\_95\_D\_5\_10\_min\_0.2ml\_min.lcm  
 Batch Filename : 27032023.lcb  
 Vial # : 1-93  
 Injection Volume : 0.5 uL  
 Date Acquired : 3/27/2023 10:22:05 AM  
 Date Processed : 3/27/2023 10:32:10 AM  
 Sample Type : Unknown  
 Acquired by : IIT GOA  
 Processed by : IIT GOA

## <Chromatogram>

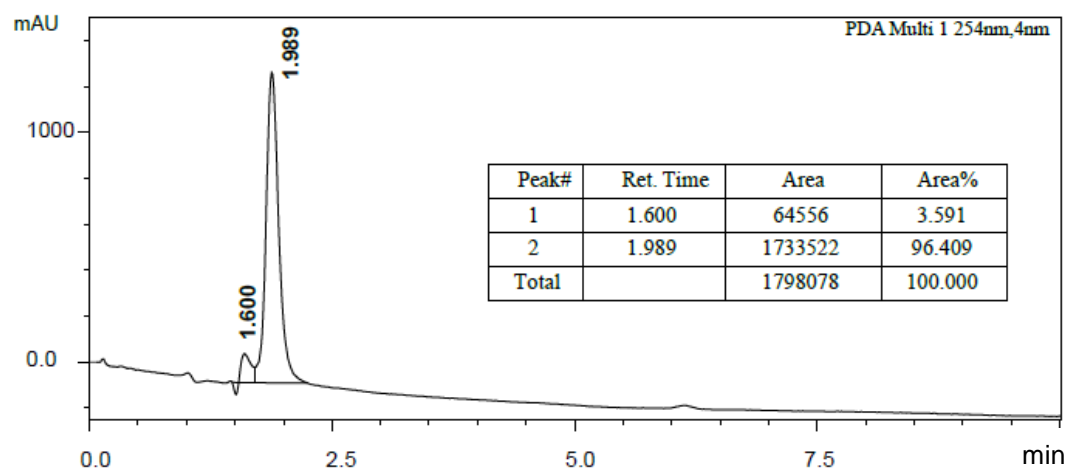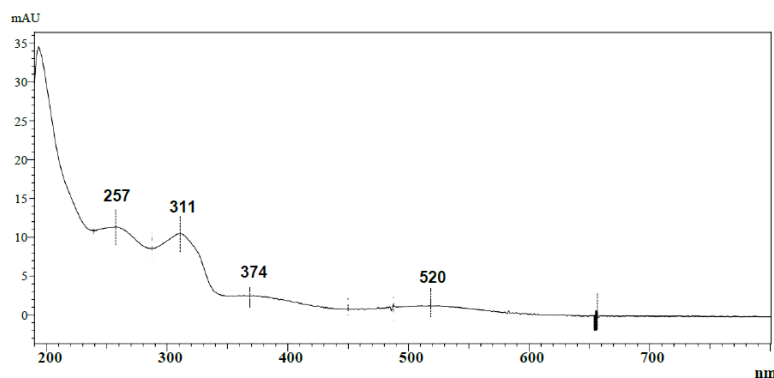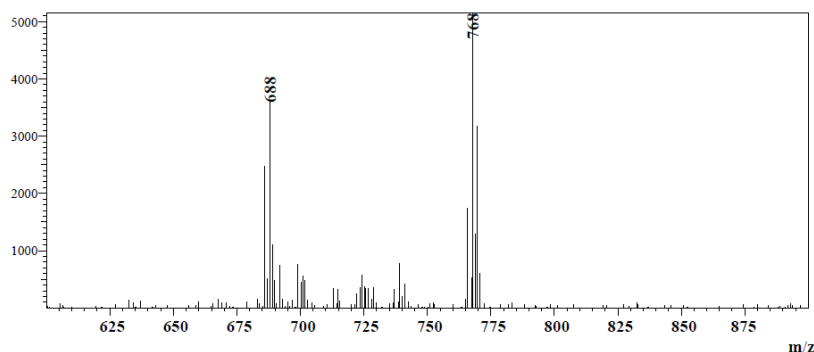

**Figure S9k:** RP-HPLC-MS and corresponding UV-Vis spectra of **Re5** at  $t_R = 1.989$  min; HPLC purity 96.4%;  $m/z$  values for  $t_R =$  for 1.600 & 1.989 min shows same  $m/z$ ; Mass fragmentation pattern at 1.989 min [ $C_{28}H_{19}BrFeN_3O_3Re = M$ ],  $m/z = 768$  [ $M+H$ ]<sup>+</sup> ( $C_{28}H_{20}BrFeN_3O_3Re$ ),  $m/z = 688$  [ $M-Br$ ]<sup>+</sup> ( $C_{28}H_{19}N_3O_3Re$ ).



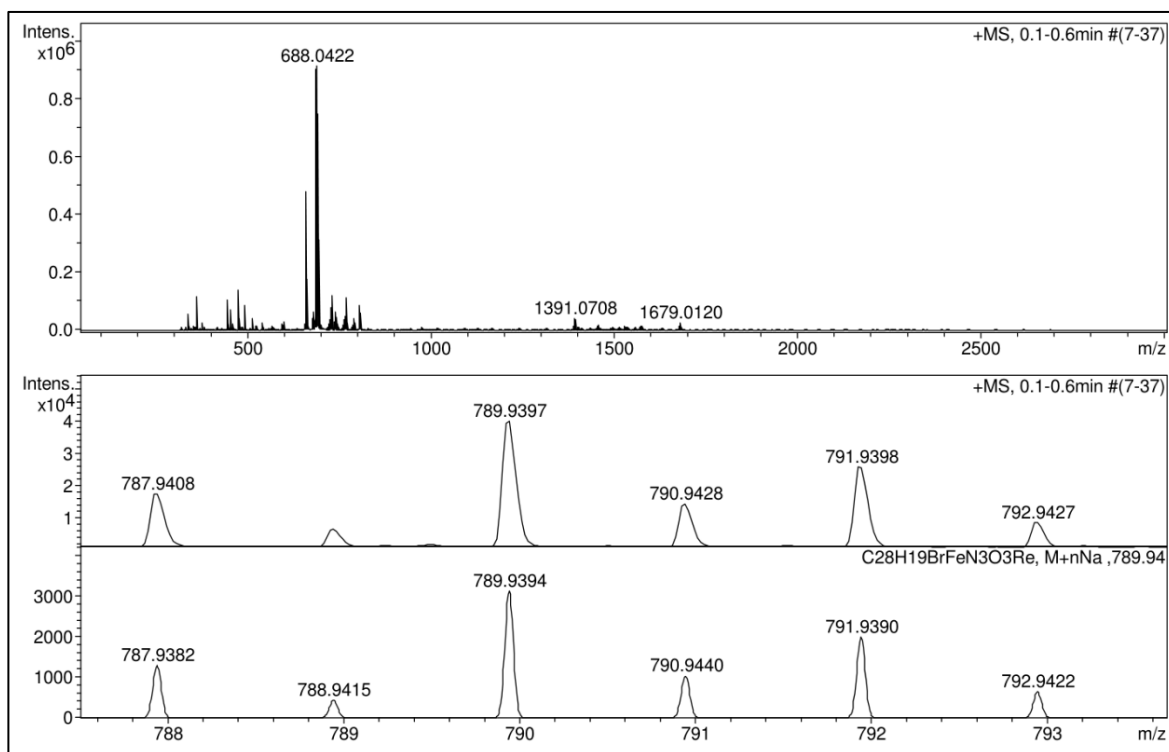

**Figure S9i:** HRMS for Re5 [ $C_{28}H_{19}BrFeN_3O_3Re = M$ ] Calcd for  $[M+Na]^+$   $m/z = 789.9394$  ( $C_{28}H_{19}^{79}BrFeN_3O_3ReNa$ ) found  $m/z = 789.9397$   $[M+Na]^+$ ; Calcd for  $[(M-Br)^+]$   $m/z = 688.0352$  found  $m/z = 688.0422$ .

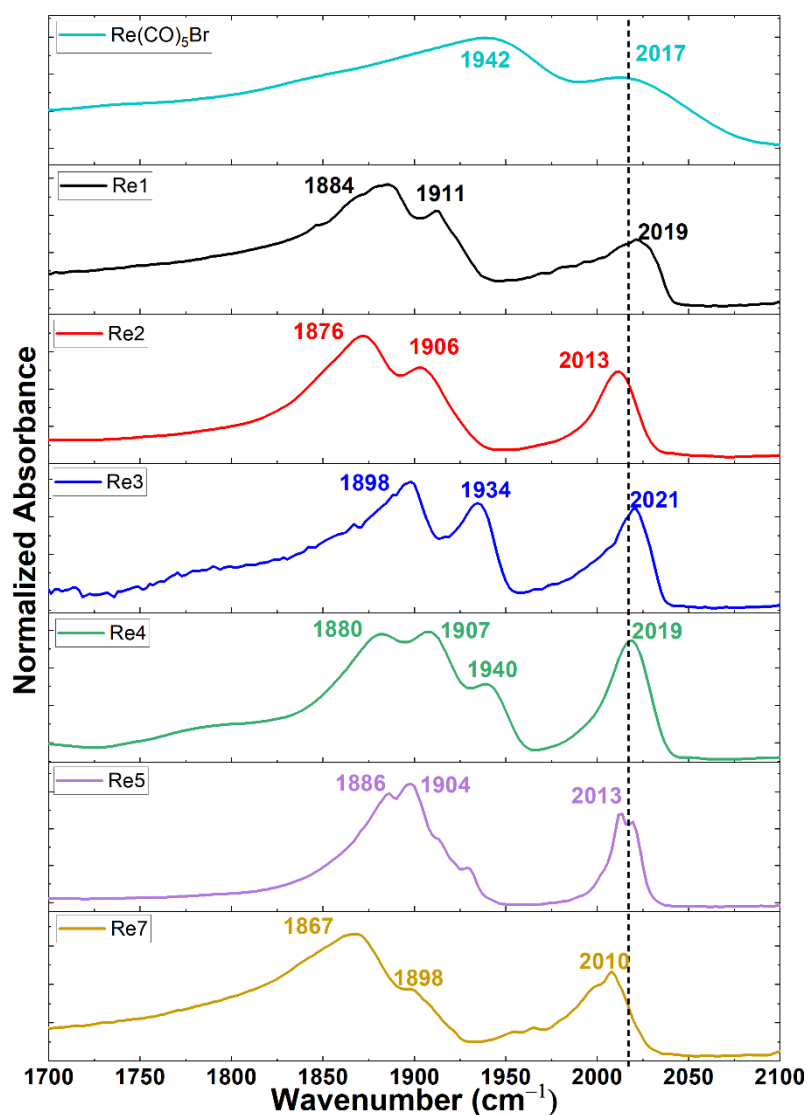

| <i>Re(I) complexes</i>               | $\nu_{\text{str}(\text{C}=\text{O})} (\text{cm}^{-1})$ |             |             |
|--------------------------------------|--------------------------------------------------------|-------------|-------------|
| <i>Re(CO)<sub>5</sub>Br</i>          | 2017                                                   | 1942        |             |
| <i>Re1</i>                           | 2019                                                   | 1911        | 1884        |
| <i>Re2</i>                           | 2013 (2018) <sup>1</sup>                               | 1906 (1909) | 1876 (1878) |
| <i>Re3</i>                           | 2021                                                   | 1934        | 1898        |
| <i>Re4</i>                           | 2019                                                   | 1940 & 1907 | 1880        |
| <i>Re5</i>                           | 2013                                                   | 1904        | 1886        |
| <i>Re(bpy)(CO)<sub>3</sub>Br/Re7</i> | 2010(2011) <sup>2</sup>                                | 1898 (1903) | 1867 (1880) |

**Figure S10:** Comparisons of infrared spectra for all *Re(I)* complexes and *Re(CO)<sub>5</sub>Br*, the starting precursor. In the parenthesis, previously reported values are shown.

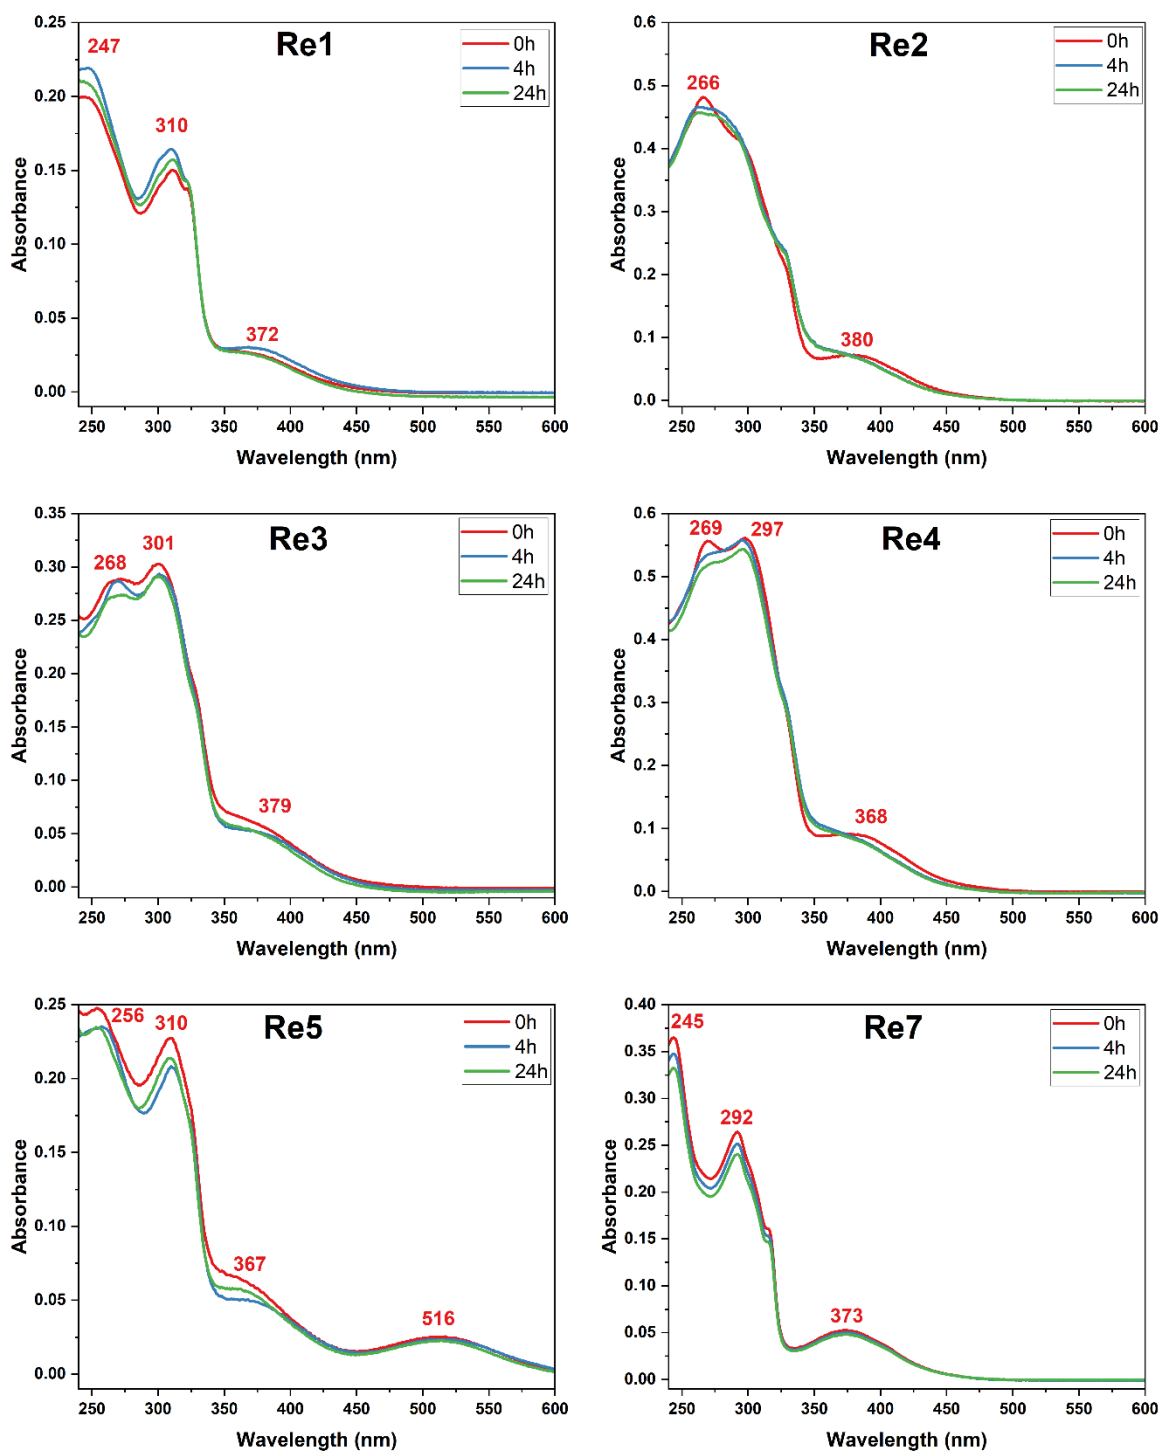

**Figure S11.:** UV-Vis spectral changes in Re(I) complexes (0.01 mM in acetonitrile, obtained from diluting a stock solution of 0.3 mM in acetonitrile) shown at certain time intervals 0 h, 4 h and 24 h. The sample was kept at ambient condition.

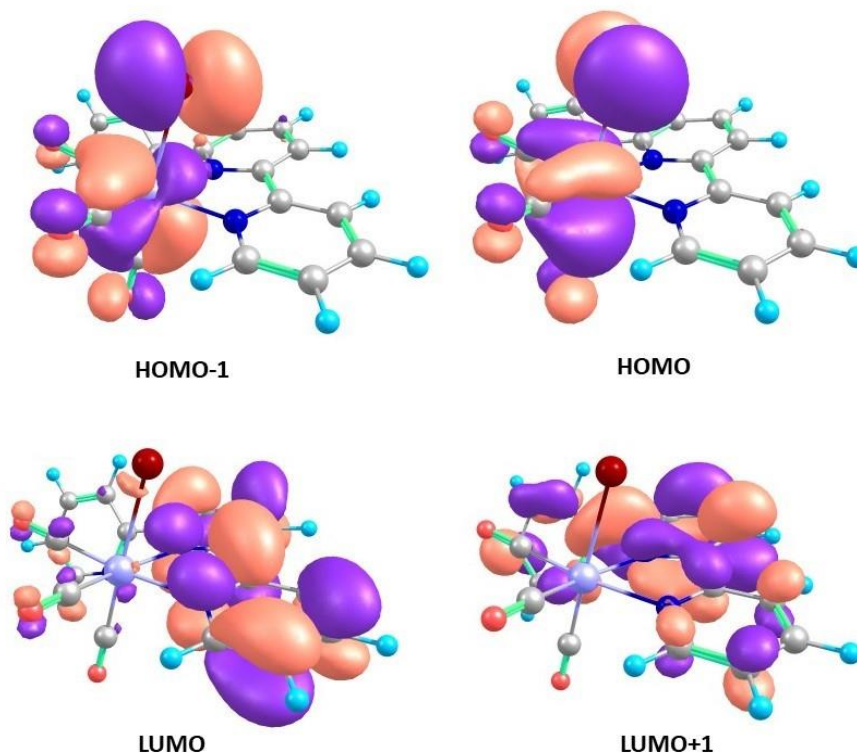

| <i>Transition Wavelength(nm)</i> | <i>Oscillator Strength</i> | <i>Excitations</i>                                                            | <i>Nature</i>                |
|----------------------------------|----------------------------|-------------------------------------------------------------------------------|------------------------------|
| 249                              | 0.180                      | $\pi(tpy) \rightarrow \pi^*(tpy)$<br>$p_x(Br) \rightarrow \pi^*(tpy)$         | ILCT                         |
| 256                              | 0.146                      | $\pi(tpy) \rightarrow \pi^*(tpy)$<br>$p_y(Br) \rightarrow \pi^*(tpy)$         | ILCT                         |
| 303                              | 0.393                      | $\pi(tpy) \rightarrow \pi^*(tpy)$<br>$\pi_{yz}(Re-Br) \rightarrow \pi^*(tpy)$ | Combination of MLCT and ILCT |
| 431                              | 0.056                      | $5d_{yz}(Re), 4p_y(Br) \rightarrow \pi^*(tpy)$                                | MLCT                         |

*tpy*=terpyridine

**Figure S12:** Frontier Molecular Orbitals of complex **ReI**; with TDDFT data calculated at B3LYP/Def2-TZVP level of theory using acetonitrile as implicit solvent.

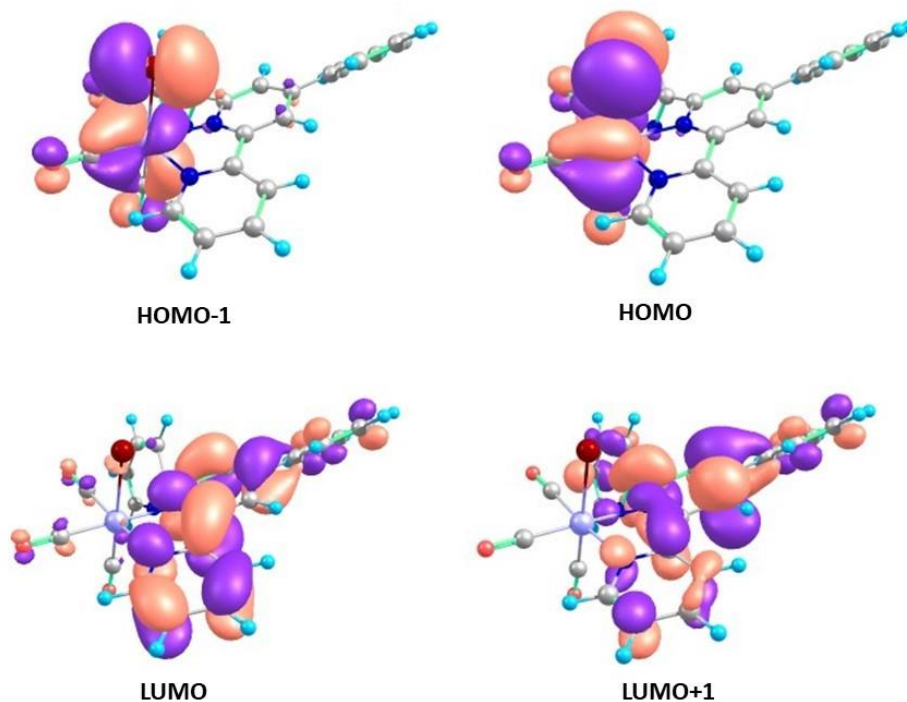

| <i>Transition Wavelength(nm)</i> | <i>Oscillator Strength</i> | <i>Excitations</i>                                                            | <i>Nature</i>                       |
|----------------------------------|----------------------------|-------------------------------------------------------------------------------|-------------------------------------|
| 281                              | 0.355                      | $\pi(tpy) \rightarrow \pi^*(tpy)$<br>$p_y(Br) \rightarrow \pi^*(tpy)$         | <i>ILCT</i>                         |
| 309                              | 0.287                      | $\pi(tpy) \rightarrow \pi^*(tpy)$<br>$\pi_{yz}(Re-Br) \rightarrow \pi^*(tpy)$ | <i>Combination of MLCT and ILCT</i> |
| 438                              | 0.088                      | $5d_{yz}(Re), 4p_y(Br) \rightarrow \pi^*(tpy)$                                | <i>MLCT</i>                         |

**Figure S13:** Frontier Molecular Orbitals of complex **Re2**; with TDDFT data calculated at B3LYP/Def2-TZVP level of theory using acetonitrile as implicit solvent.

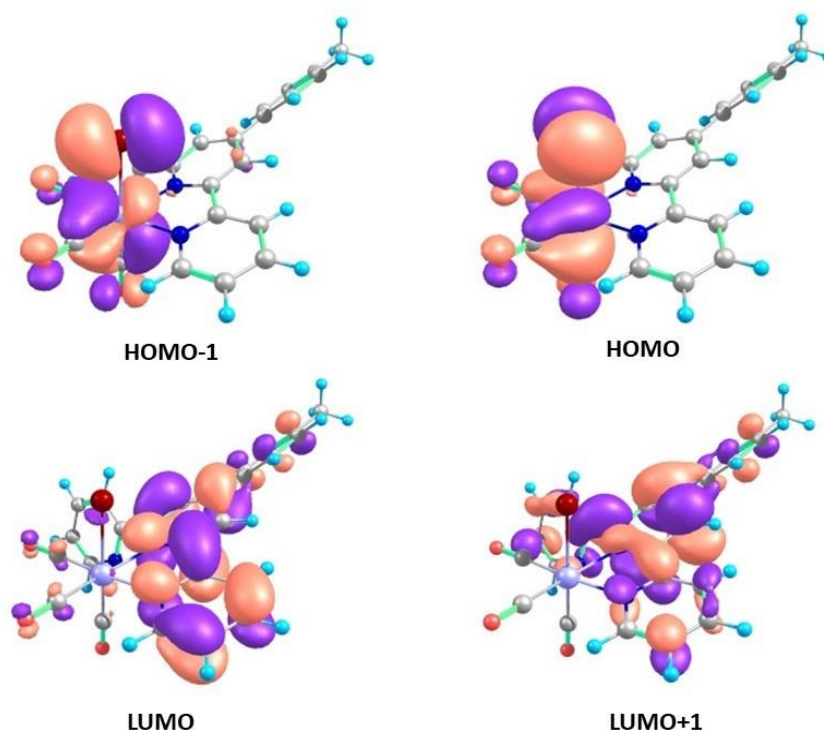

| <i>Transition Wavelength(nm)</i> | <i>Oscillator Strength</i> | <i>Excitations</i>                                                            | <i>Nature</i>                |
|----------------------------------|----------------------------|-------------------------------------------------------------------------------|------------------------------|
| 287                              | 0.328                      | $\pi(tpy) \rightarrow \pi^*(tpy)$<br>$p_y(Br) \rightarrow \pi^*(tpy)$         | ILCT                         |
| 309                              | 0.227                      | $\pi(tpy) \rightarrow \pi^*(tpy)$<br>$\pi_{yz}(Re-Br) \rightarrow \pi^*(tpy)$ | Combination of MLCT and ILCT |
| 436                              | 0.098                      | $5d_{yz}(Re), 4p_y(Br) \rightarrow \pi^*(tpy)$                                | MLCT                         |

**Figure S14:** Frontier Molecular Orbitals of complex **Re3**; with TDDFT data calculated at B3LYP/Def2-TZVP level of theory using acetonitrile as implicit solvent.

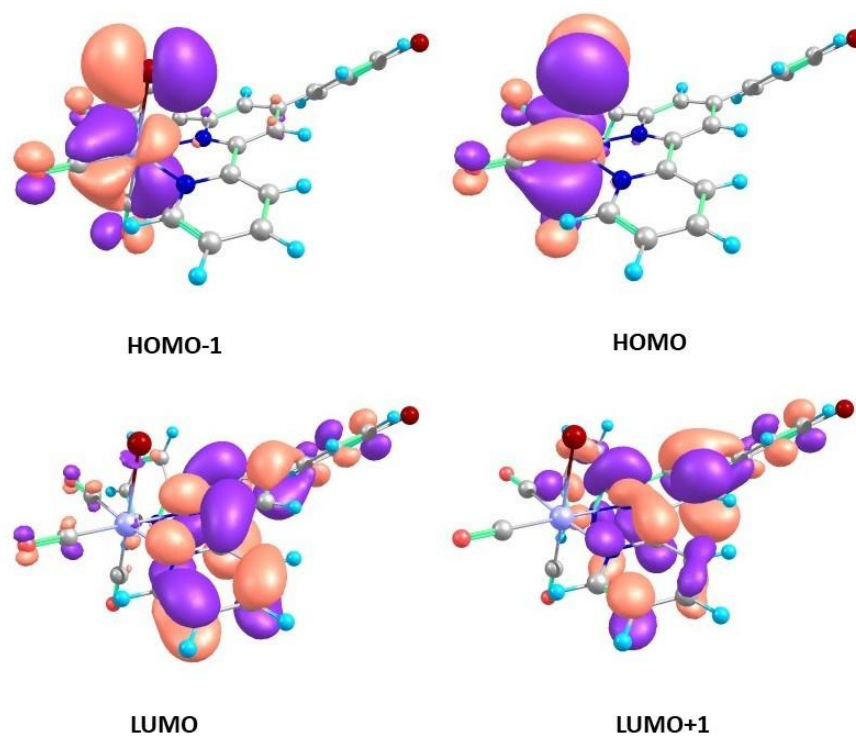

| <i>Transition Wavelength(nm)</i> | <i>Oscillator Strength</i> | <i>Excitations</i>                                                            | <i>Nature</i>                |
|----------------------------------|----------------------------|-------------------------------------------------------------------------------|------------------------------|
| 285                              | 0.437                      | $\pi(tpy) \rightarrow \pi^*(tpy)$<br>$p_y(Br) \rightarrow \pi^*(tpy)$         | ILCT                         |
| 310                              | 0.211                      | $\pi(tpy) \rightarrow \pi^*(tpy)$<br>$\pi_{yz}(Re-Br) \rightarrow \pi^*(tpy)$ | Combination of MLCT and ILCT |
| 441                              | 0.095                      | $5d_{yz}(Re), 4p_y(Br) \rightarrow \pi^*(tpy)$                                | MLCT                         |

**Figure S15:** Frontier Molecular Orbitals of complex **Re4**; with TDDFT data calculated at B3LYP/Def2-TZVP level of theory using acetonitrile as implicit solvent.

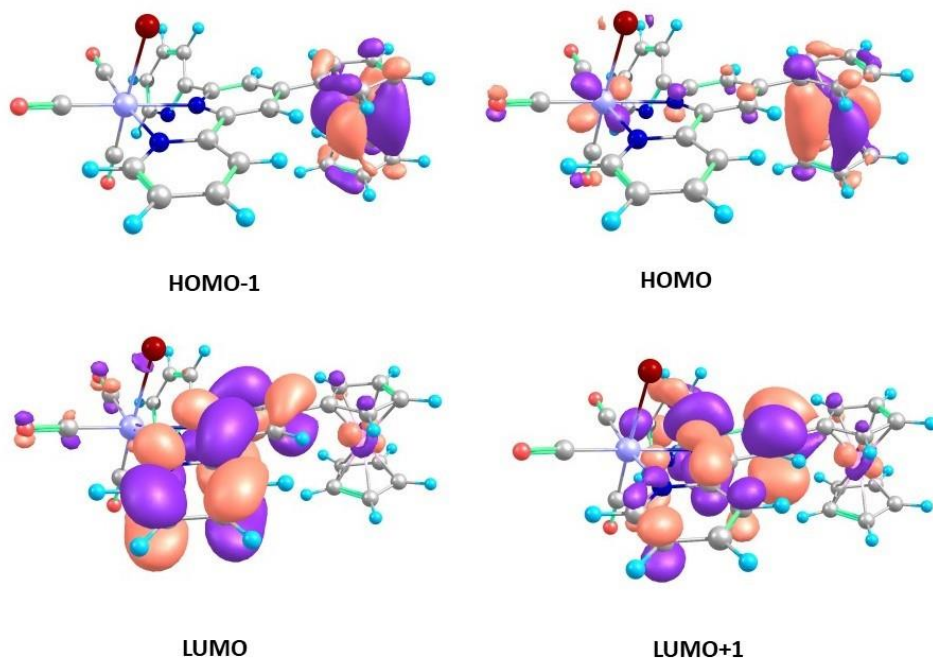

| <i>Transition Wavelength(nm)</i> | <i>Oscillator Strength</i> | <i>Excitations</i>                                                                     | <i>Nature</i>                |
|----------------------------------|----------------------------|----------------------------------------------------------------------------------------|------------------------------|
| 282                              | 0.260                      | $\pi(tpy) \rightarrow \pi^*(tpy)$<br>$p_y(Br) \rightarrow \pi^*(tpy)$                  | ILCT                         |
| 309                              | 0.197                      | $\pi(tpy) \rightarrow \pi^*(tpy)$<br>$\pi_{yz}(Re-Br) \rightarrow \pi^*(tpy)$          | Combination of MLCT and ILCT |
| 438                              | 0.098                      | $3d_{xy}(Fe) \rightarrow \pi^*(tpy)$<br>$5d_{yz}(Re), 4p_y(Br) \rightarrow \pi^*(tpy)$ | MLCT                         |
| 516                              | 0.008                      | $3d_{x^2-y^2}(Fe) \rightarrow 3d_{xz}(Fe)$<br>$3d_{z^2}(Fe) \rightarrow 3d_{yz}(Fe)$   | d-d transition               |
| 602                              | 0.013                      | $3d_{x^2-y^2}(Fe) \rightarrow 3d_{xz}(Fe)$<br>$3d_{xy}(Fe) \rightarrow 3d_{yz}(Fe)$    | d-d transition               |

**Figure S16:** Frontier Molecular Orbitals of complex **Re5**; with TDDFT data calculated at B3LYP/Def2-TZVP level of theory using acetonitrile as implicit solvent.



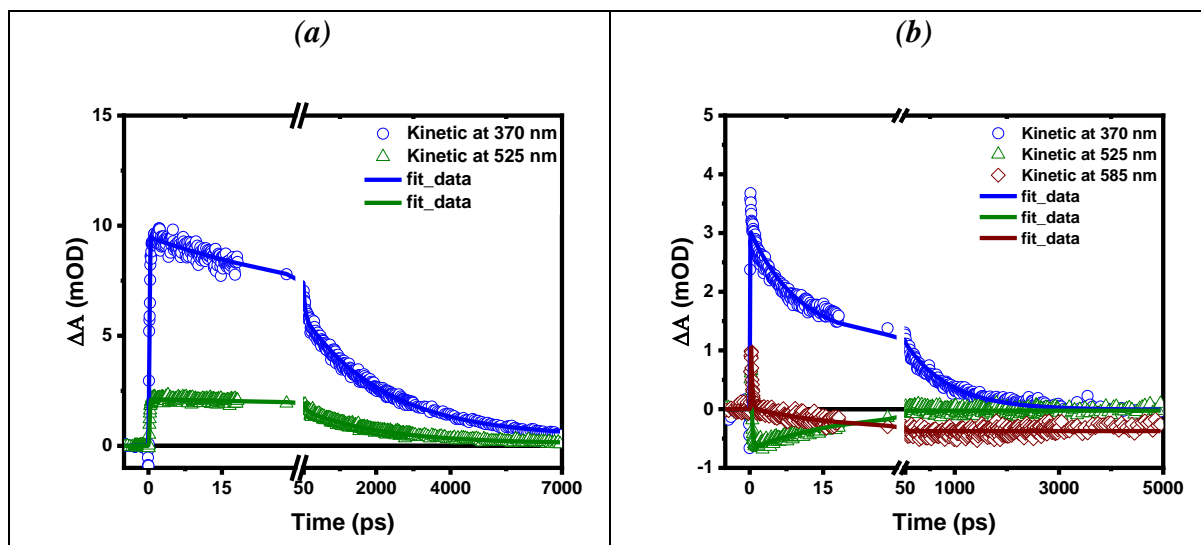

| <i>Compound</i> | <i>Wavelength (nm)</i> | $\tau_1$ (ps)                                 | $\tau_2$ (ps)                                    | <i>Standard Deviation</i> |
|-----------------|------------------------|-----------------------------------------------|--------------------------------------------------|---------------------------|
| <b>Re1</b>      | 370                    | $46 \pm 5$<br>$(0.0034 \pm 0.0001)$<br>0.38   | $2212 \pm 149$<br>$(0.0055 \pm 0.0001)$<br>0.62  | 0.0002                    |
|                 | 525                    | $97 \pm 25$<br>$(0.0005 \pm 0.00001)$<br>0.25 | $2212 \pm 164$<br>$(0.0015 \pm 0.00003)$<br>0.75 | 0.0001                    |
|                 | 370 nm                 | $10 \pm 0.7$<br>$0.0018 \pm 0.00001$<br>0.60  | 855.0<br>$0.0012 \pm 0.0001$<br>0.40             | 0.0001                    |
| <b>Re5</b>      | 525 nm                 |                                               | $19 \pm 3$<br>$-0.0006 \pm 0.00003$              | 0.00001                   |
|                 | 585 nm                 | -                                             | $18 \pm 3$<br>$0.0003 \pm 0.00002$               | 0.00001                   |

**Figure S17:** Kinetic traces at 370 nm and 525 nm for **Re1** (a) and 370 nm, 525nm, and 585 nm for **Re5** (b), with the kinetic fitting parameters in the table.

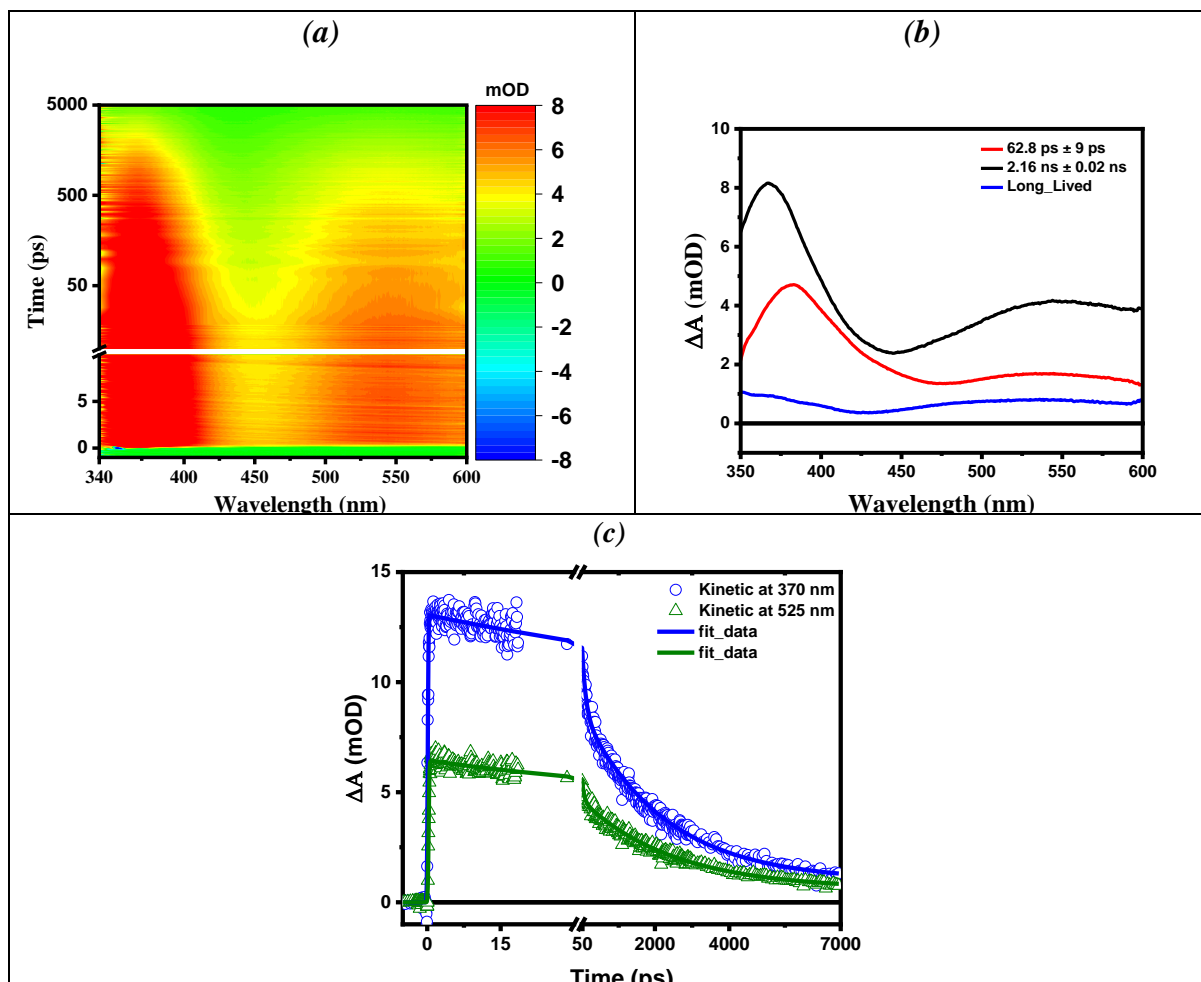

| <i>Compound</i> | <i>Wavelength (nm)</i> | $\tau_1$ (ps)         | $\tau_2$ (ps)         | <i>Standard Deviation</i> |
|-----------------|------------------------|-----------------------|-----------------------|---------------------------|
| <i>Re2</i>      | 370                    | $100 \pm 18$          | $2213 \pm 210$        | 0.0003                    |
|                 |                        | $(0.0042 \pm 0.0002)$ | $(0.007 \pm 0.0002)$  |                           |
|                 | 525                    | 0.37                  | 0.63                  | 0.0002                    |
|                 |                        | $58 \pm 11$           | $2466 \pm 200$        |                           |
|                 |                        | $(0.0020 \pm 0.0001)$ | $(0.0040 \pm 0.0001)$ |                           |
|                 |                        | 0.29                  | 0.71                  |                           |

**Figure S18:** (a) 2D plots of *Re2*, (b) global lifetime analysis, (c) Kinetic traces at 370 nm and 525 nm; with the kinetic fitting parameters in the table.

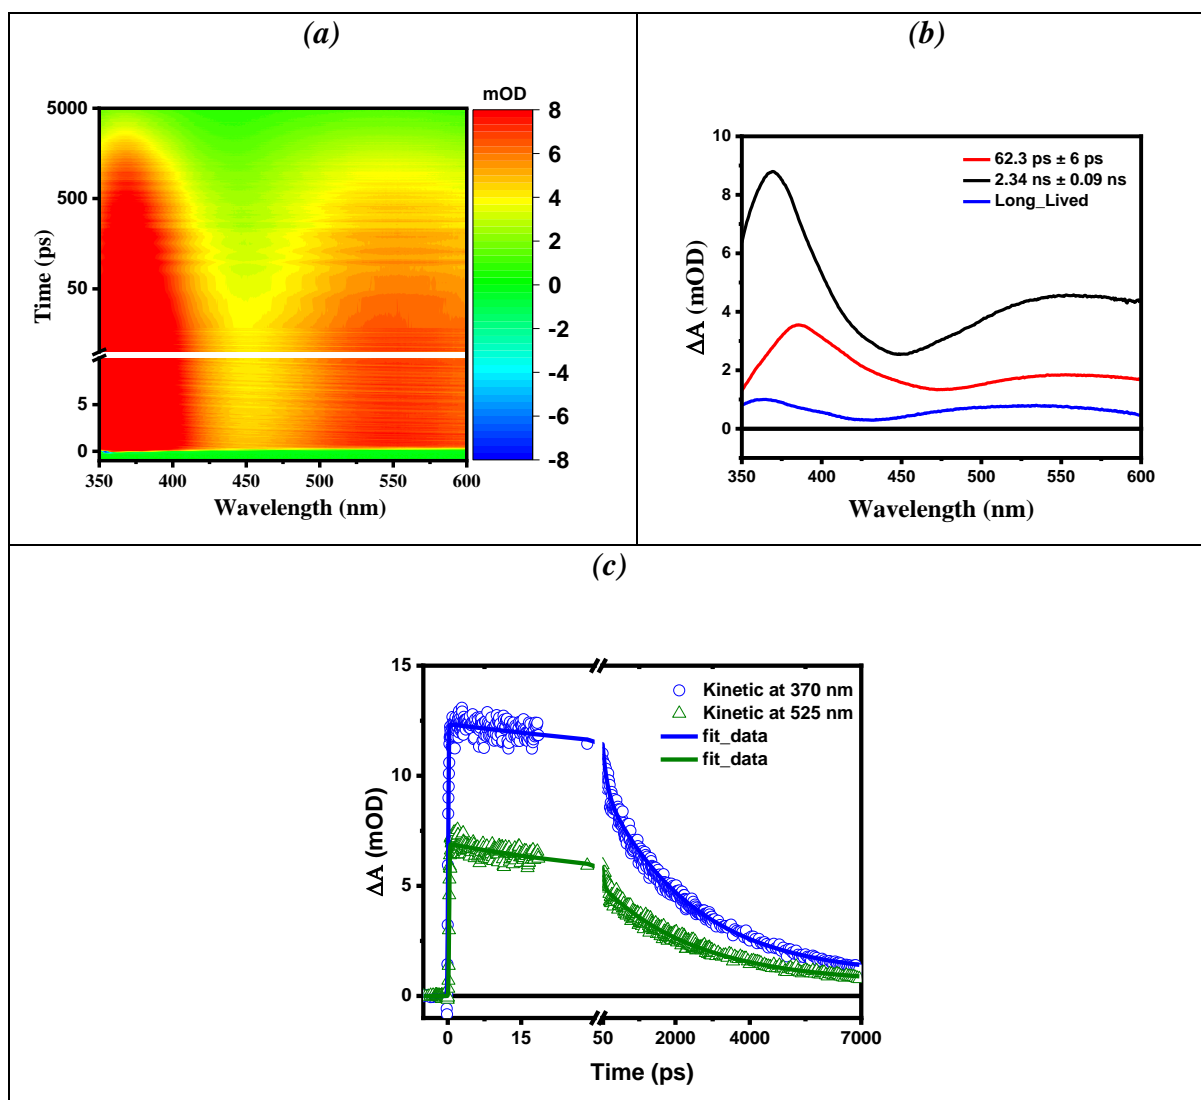

| <i>Compound</i> | <i>Wavelength (nm)</i> | $\tau_1$ (ps)         | $\tau_2$ (ps)         | <i>Standard Deviation</i> |
|-----------------|------------------------|-----------------------|-----------------------|---------------------------|
| <i>Re3</i>      | 370                    | $118 \pm 25$          | $2438 \pm 180$        | 0.0002                    |
|                 |                        | $(0.0028 \pm 0.0002)$ | $(0.0086 \pm 0.0001)$ |                           |
|                 | 525                    | $0.19$                | $0.81$                | 0.0002                    |
|                 |                        | $46 \pm 8$            | $2585 \pm 206$        |                           |
|                 |                        | $(0.0018 \pm 0.0001)$ | $(0.0044 \pm 0.0001)$ |                           |
|                 |                        | $0.29$                | $0.71$                |                           |

**Figure S19:** (a) 2D plots of *Re3*, (b) global lifetime analysis, (c) Kinetic traces at 370 nm and 525 nm; with the kinetic fitting parameters in the table.

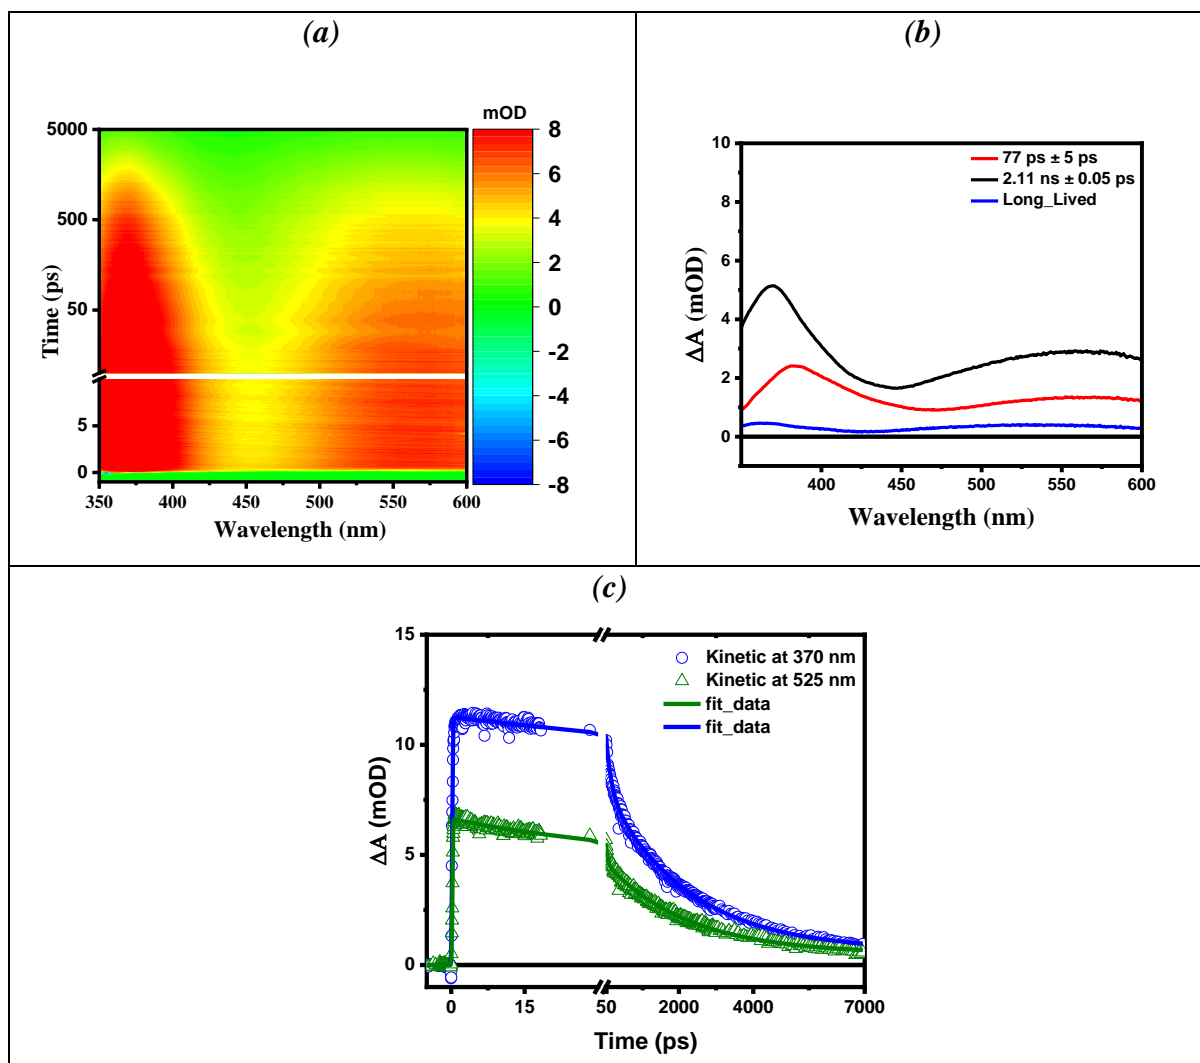

| <i>Compound</i> | <i>Wavelength (nm)</i> | $\tau_1$ (ps)         | $\tau_2$ (ps)         | <i>Standard Deviation</i> |
|-----------------|------------------------|-----------------------|-----------------------|---------------------------|
| <i>Re4</i>      | 370                    | $141 \pm 19$          | $2210 \pm 130$        | 0.0001                    |
|                 |                        | $(0.0021 \pm 0.0001)$ | $(0.0049 \pm 0.0001)$ |                           |
|                 | 525                    | $45 \pm 4$            | $2226 \pm 95$         | 0.0001                    |
|                 |                        | $(0.0012 \pm 0.0001)$ | $(0.0028 \pm 0.0001)$ |                           |
|                 |                        | 0.30                  | 0.70                  |                           |

**Figure S20:** (a) 2D plots of *Re4*, (b) global lifetime analysis, (c) Kinetic traces at 370 nm and 525 nm; with the kinetic fitting parameters in the table.

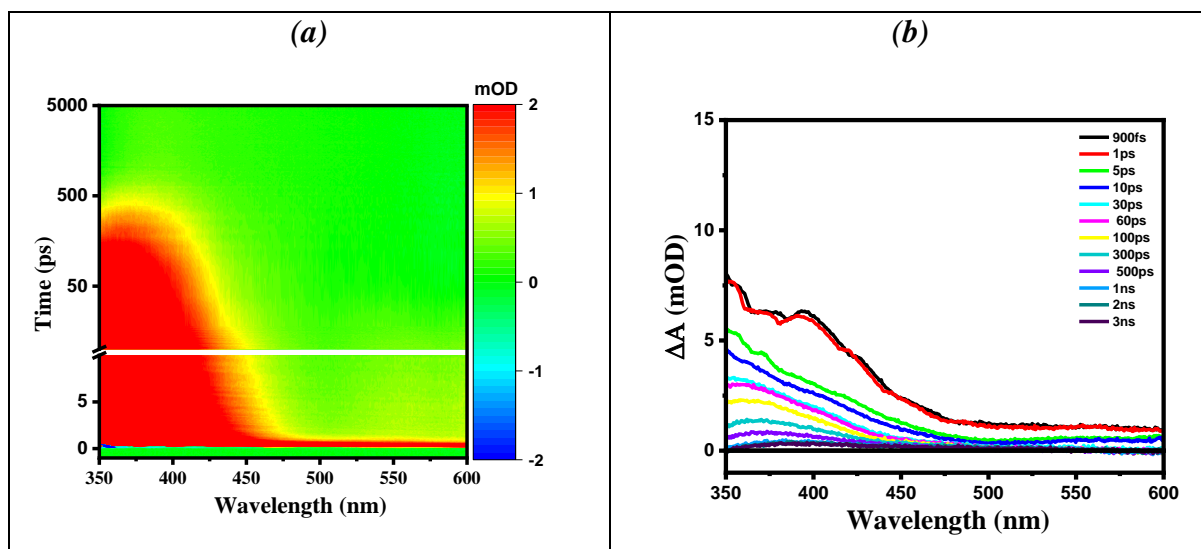

**Figure S21:** (a) 2D plots of *L5*, (b) transient absorption spectra at different delay times.

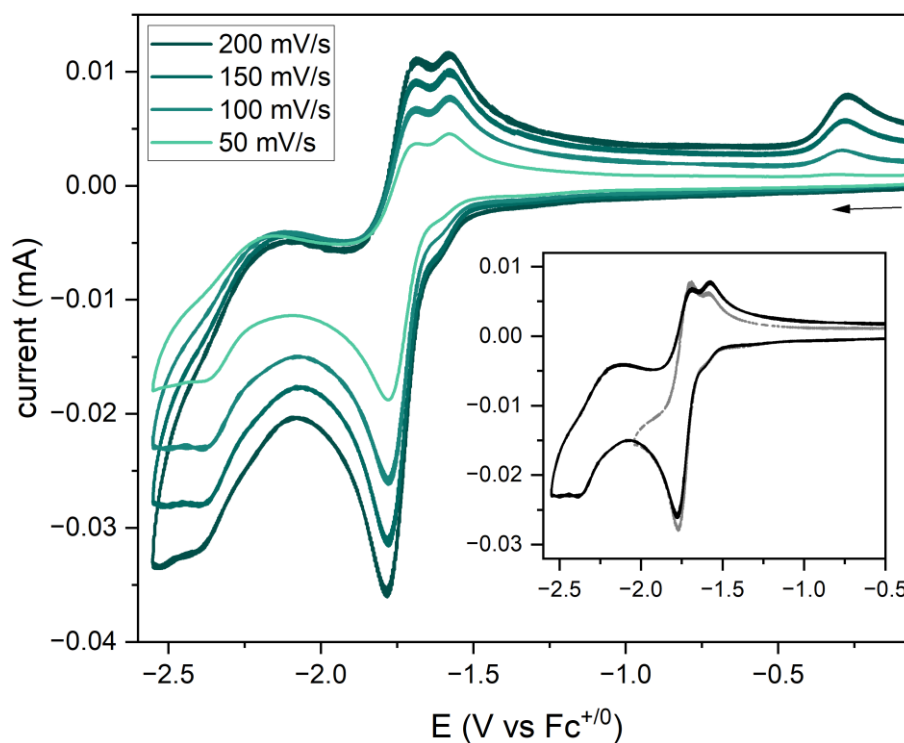

**Figure S22:** Scan rate dependent cyclic voltammograms of 1 mM *ReI* in  $\text{N}_2$  saturated acetonitrile containing 0.1 M  $n\text{-Bu}_4\text{NBF}_4$  as the supporting electrolyte. The inset figure shows the voltammogram of *ReI* when the scan is reversed before the second reduction.

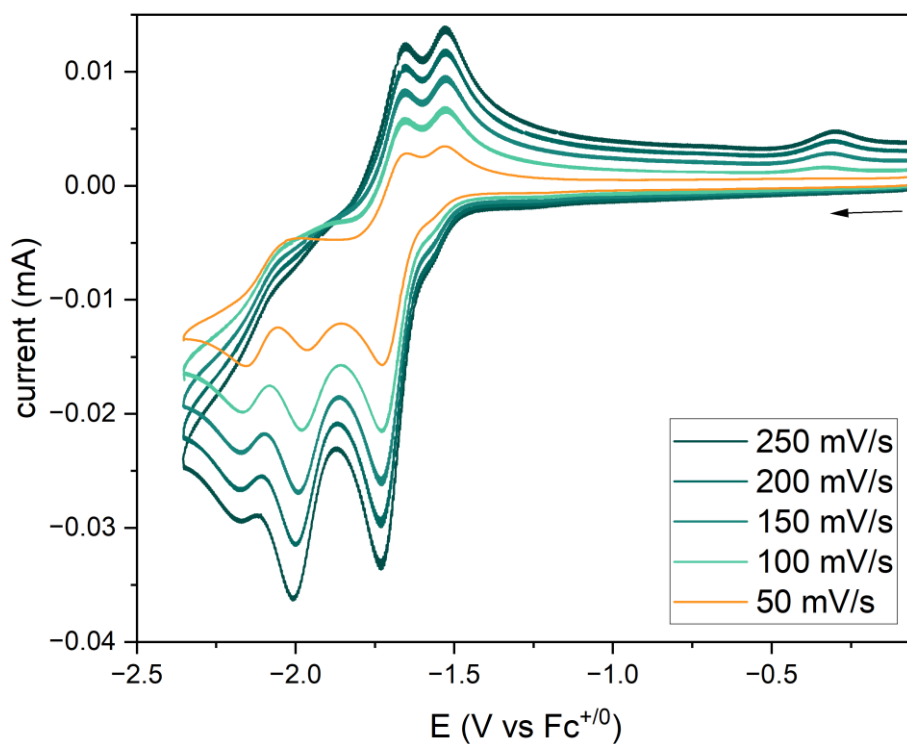

**Figure S23:** Scan rate dependent cyclic voltammograms of 1 mM **Re2** in  $N_2$  saturated acetonitrile containing 0.1 M  $n\text{-Bu}_4\text{NBF}_4$  as the supporting electrolyte.

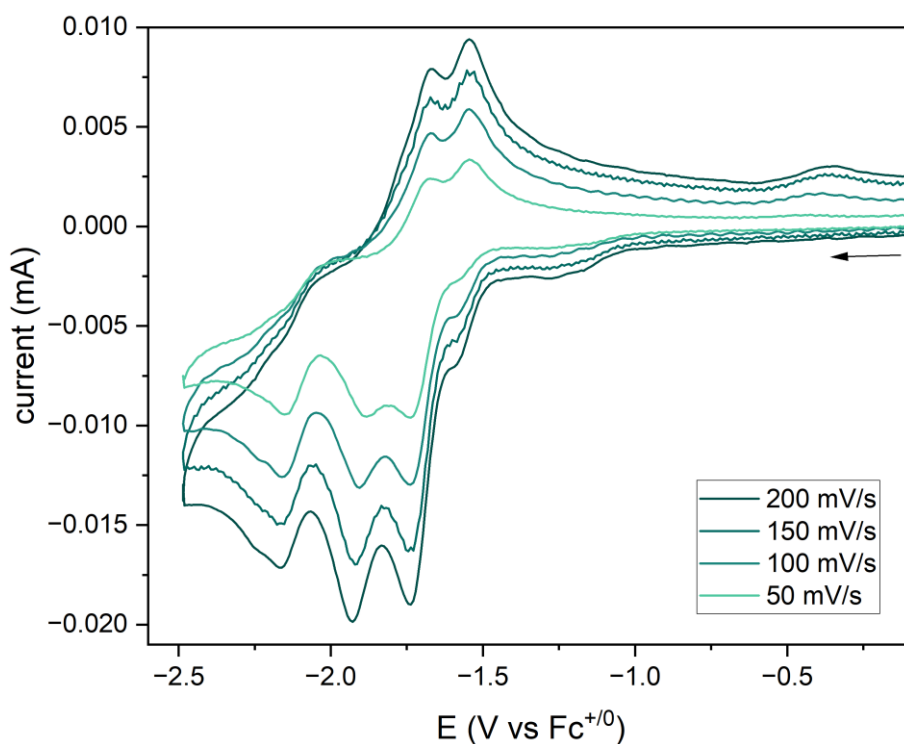

**Figure S24:** Scan rate dependent cyclic voltammograms of 0.6 mM **Re3** in  $N_2$  saturated acetonitrile containing 0.1 M  $n\text{-Bu}_4\text{NBF}_4$  as the supporting electrolyte.

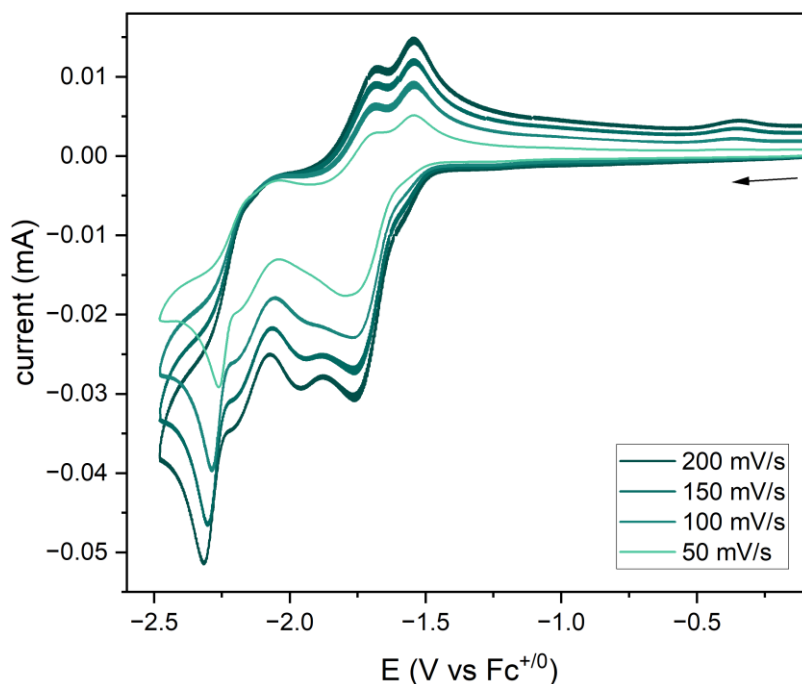

**Figure S25:** Scan rate dependent cyclic voltammograms of 1 mM **Re4** in  $N_2$  saturated acetonitrile containing 0.1 M  $n\text{-Bu}_4\text{NBF}_4$  as the supporting electrolyte.

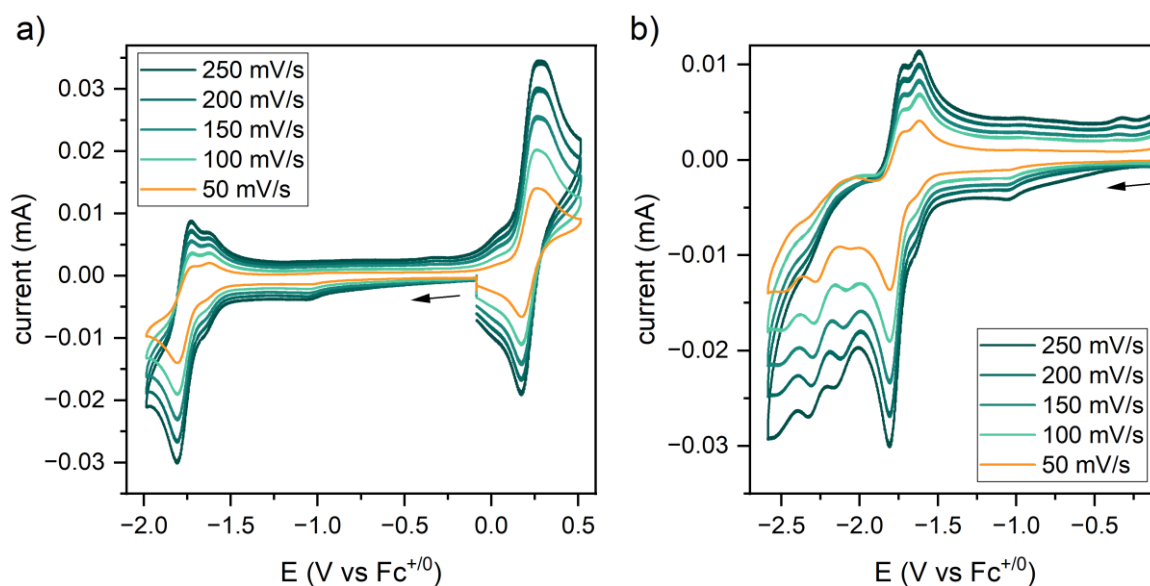

**Figure S26:** Scan rate dependent cyclic voltammograms of 1 mM **Re5** in  $N_2$  saturated acetonitrile containing 0.1 M  $n\text{-Bu}_4\text{NBF}_4$  as the supporting electrolyte. Figure (a) shows oxidative event(s) and the first reduction event. Figure (b) shows the reduction processes occurring before  $-2.5$  V.

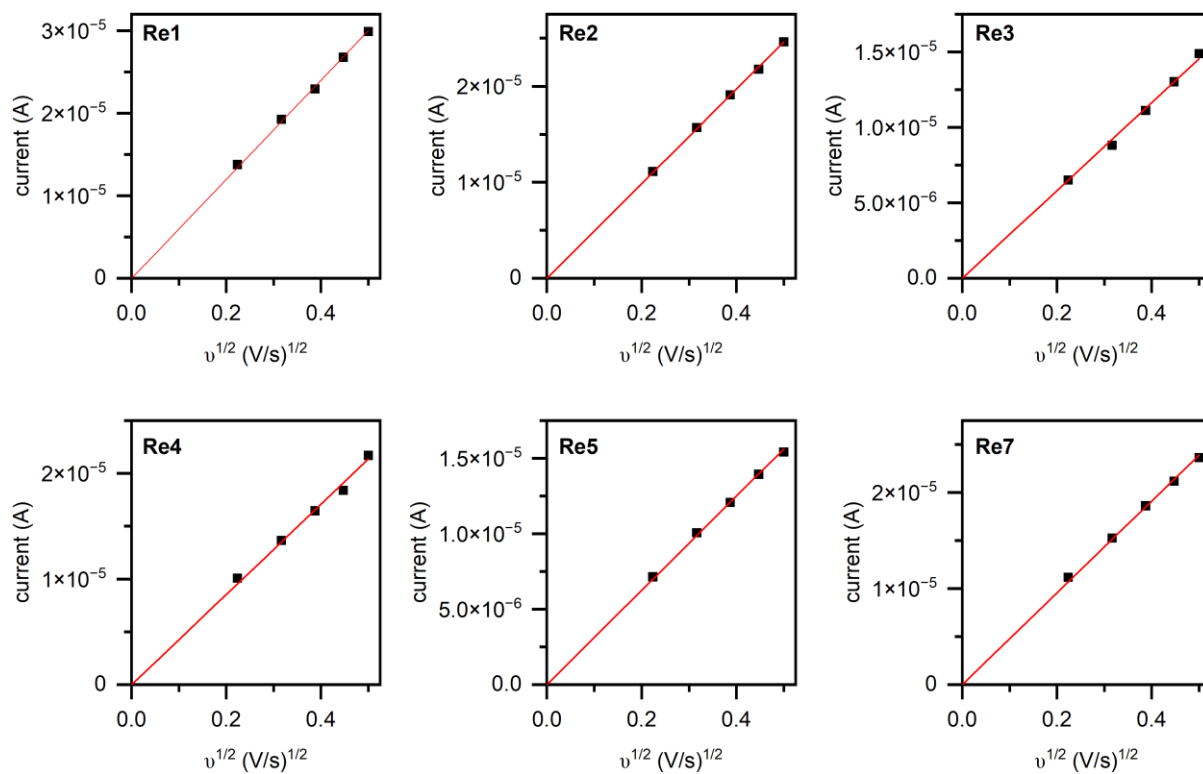

**Figure S27:** Determination of diffusion coefficients from scan rate dependent CVs shown in **Figure S22-26**. Peak currents for the first reductive step ( $\sim -1.8$  V) vs the square root of the scan rate for **Re1-5** and **Re7**.



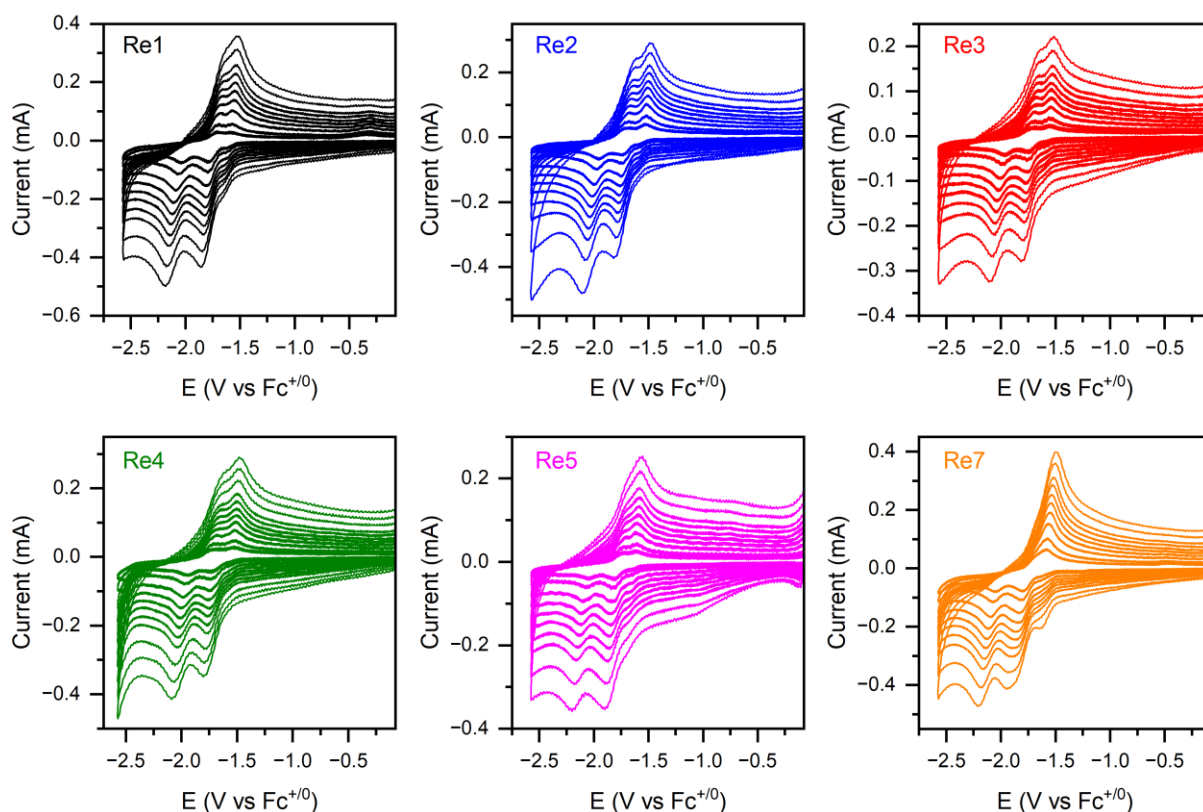

**Figure S28:** Scan rate dependent cyclic voltammograms of **Re1-5** and **Re7** at fast scan rates (25, 20, 15, 12.5, 10, 8, 6, 4, 2, 1  $V s^{-1}$ ) in  $N_2$  saturated acetonitrile containing 0.1 M  $n-Bu_4NBF_4$  as the supporting electrolyte.

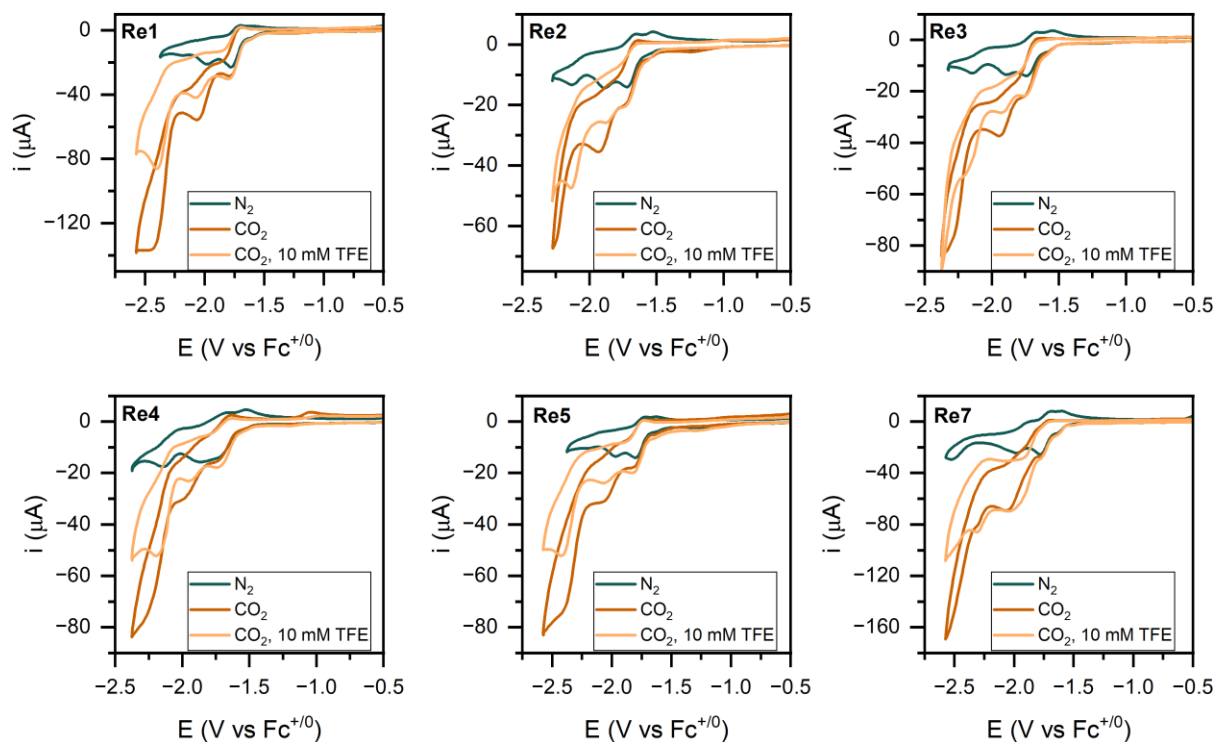

**Figure S29:** Catalytic cyclic voltammograms of **Re1-5** and **Re7** recorded in acetonitrile under  $N_2$  and  $CO_2$  in the absence or presence of 10 mM trifluoroethanol (TFE). Voltammograms were recorded at 100  $mV s^{-1}$  using 0.1 M  $n-Bu_4NBF_4$  as the supporting electrolyte.

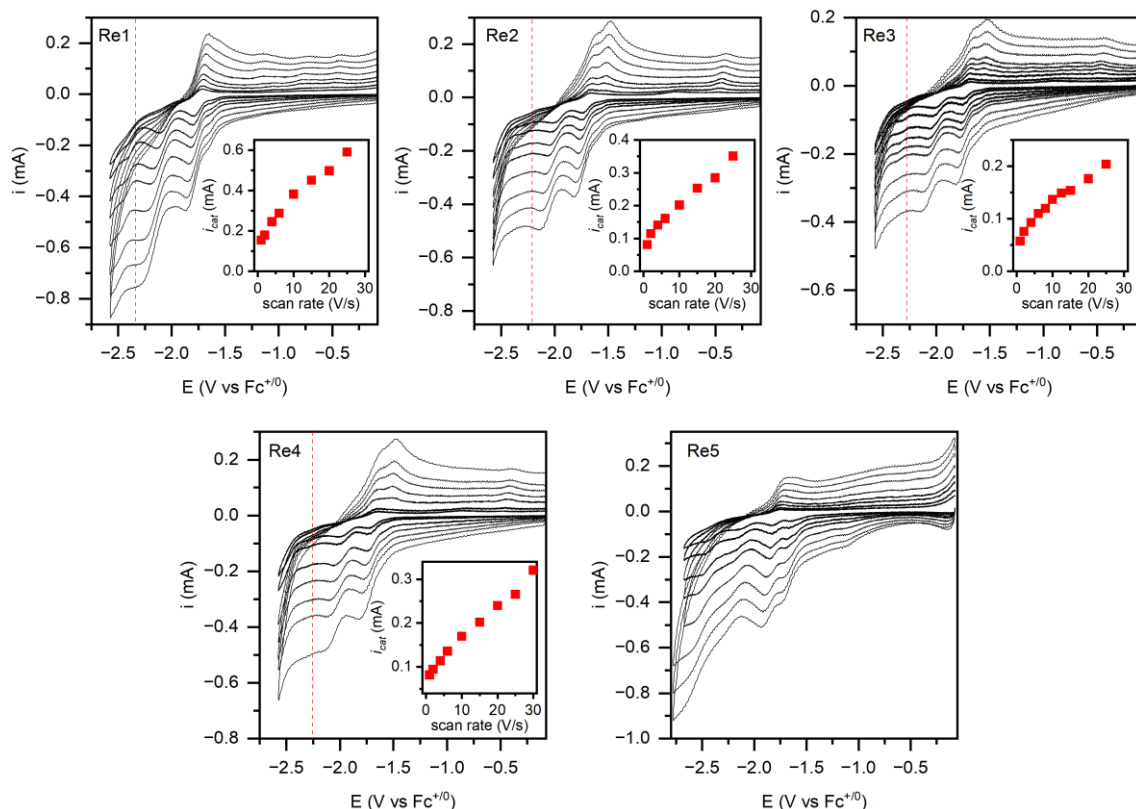

**Figure S30:** Cyclic voltammograms of **Re1-5** at fast scan rates (25, 20, 15, 12.5, 10, 8, 6, 4, 2, 1  $V s^{-1}$ ) in  $CO_2$  saturated acetonitrile containing 0.1 M  $n-Bu_4NBF_4$  as the supporting electrolyte. The inset figures present the scan rate dependence of the plateau catalytic current ( $i_{cat}$ ). The corresponding potential is shown by the red dashed line.

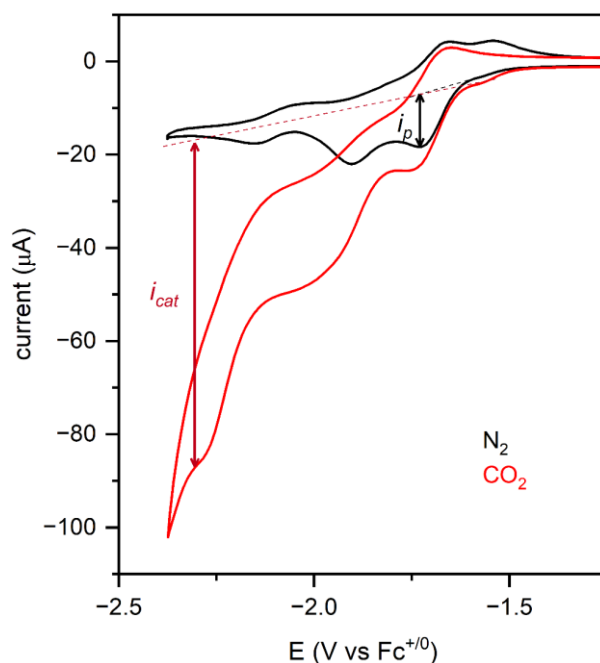

**Figure S31:** Representative cyclic voltammograms of **Re2** ( $\sim 1$  mM) under  $N_2$  and  $CO_2$  saturated acetonitrile to demonstrate the determination of  $i_{cat}$  and  $i_p$ . Conditions: supporting electrolyte 0.1 M  $n-Bu_4NBF_4$ , scan rate 100  $mV s^{-1}$ .

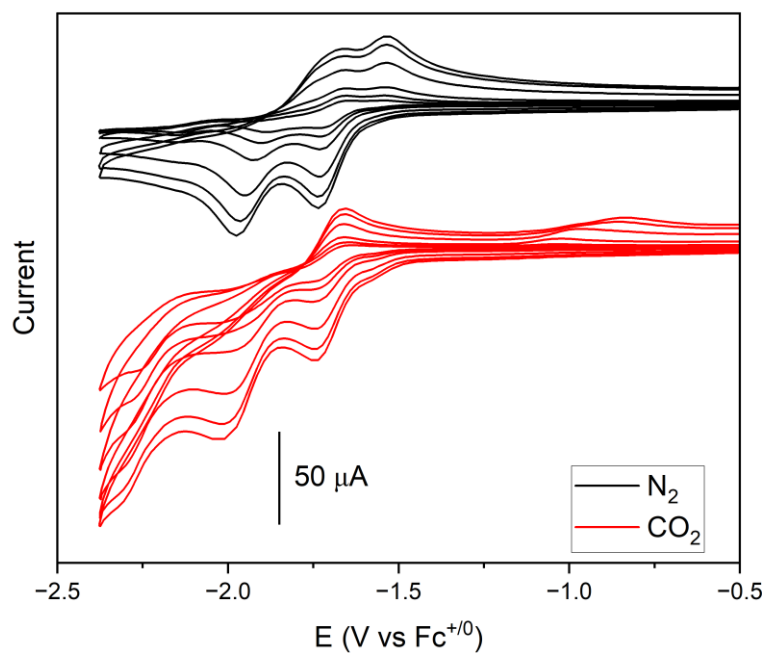

**Figure S32:** Cyclic voltammograms of **Re2** ( $\sim 1$  mM) under  $N_2$  and  $CO_2$  saturated acetonitrile at different scan rates (1, 0.8, 0.5, 0.2, 0.1, 0.05  $V s^{-1}$ ). Conditions: supporting electrolyte 0.1 M  $n-Bu_4NBF_4$ .

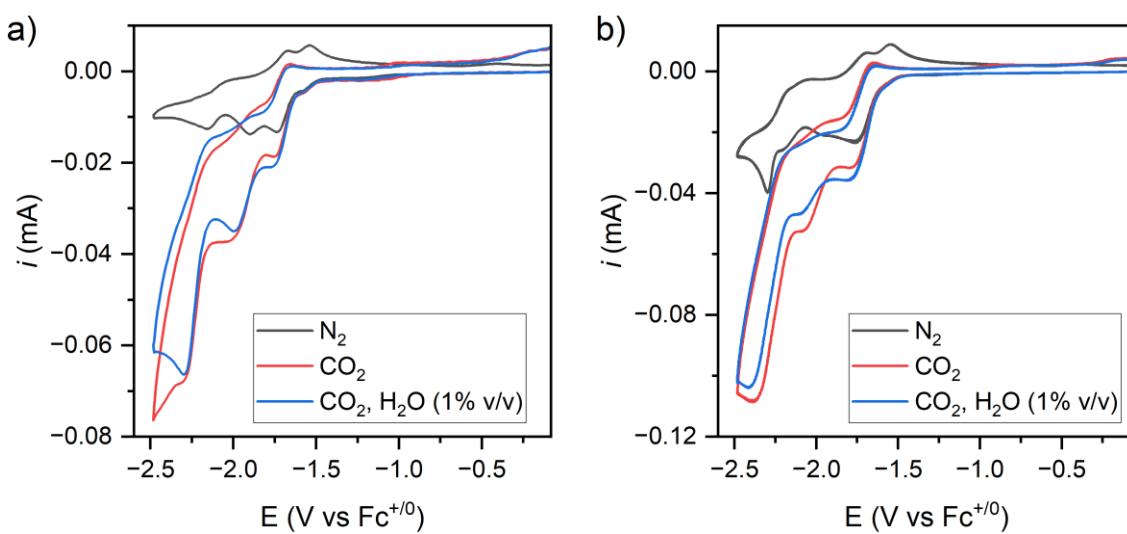

**Figure S33:** Cyclic voltammograms of (a) **Re3** (0.6 mM) and (b) **Re4** (1 mM) under  $N_2$  and  $CO_2$  in neat acetonitrile and in acetonitrile/water mixture (99:1 v/v), demonstrating minimal effect of water on electrocatalysis. Condition: 0.1 M  $n-Bu_4NBF_4$  supporting electrolyte, 0.1  $V s^{-1}$  scan rate.

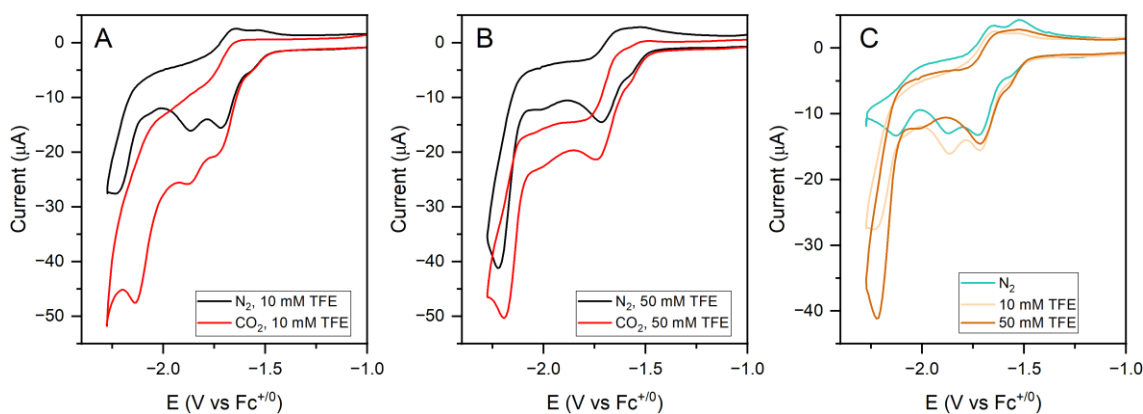

**Figure S34:** Cyclic voltammograms of **Re2** under  $N_2$  and  $CO_2$  in the presence of varying concentration of TFE. Figure A and B show the voltametric response in the presence of 10 mM and 50 mM TFE, respectively, under  $N_2$  and  $CO_2$ . Figure C shows the difference in response under  $N_2$  without TFE and in the presence of TFE (10 and 50 mM). Condition: 0.1 M  $n-Bu_4NBF_4$  supporting electrolyte,  $0.1 V s^{-1}$  scan rate.

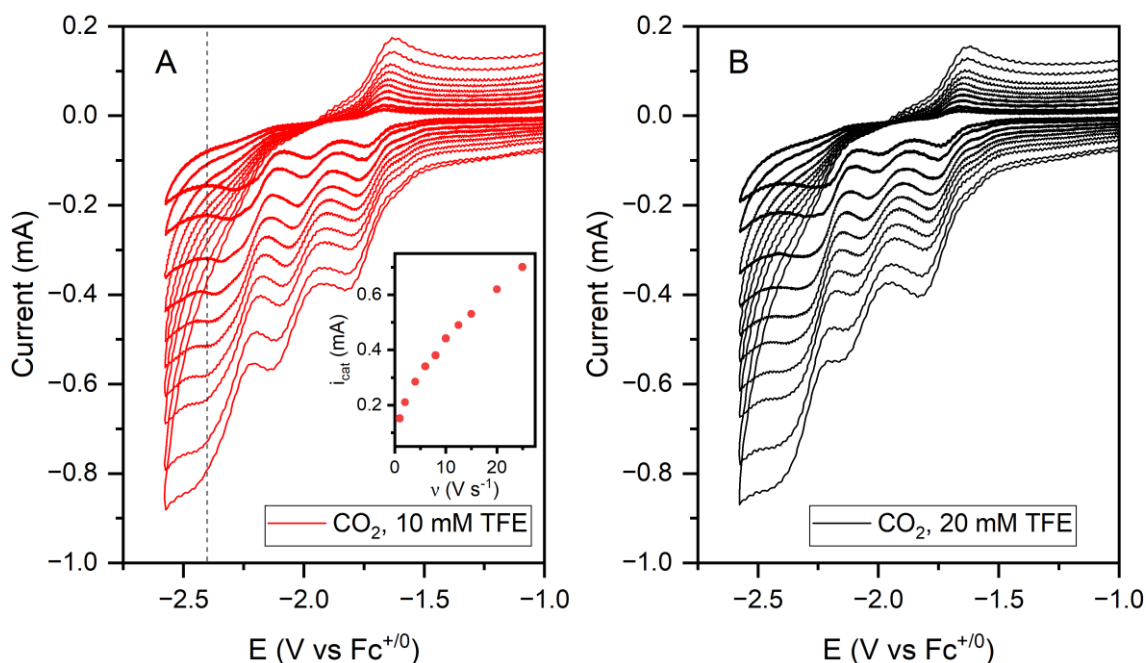

**Figure S35:** Cyclic voltammograms of **Re2** ( $\sim 0.6$  mM) at fast scan rates (25, 20, 15, 12.5, 10, 8, 6, 4, 2,  $1 V s^{-1}$ ) in  $CO_2$  saturated acetonitrile containing (A) 10 mM TFE and (B) 20 mM TFE. 0.1 M  $n-Bu_4NBF_4$  was used as the supporting electrolyte. Inset figure (A) shows the dependence of  $i_{cat}$  on scan rate.

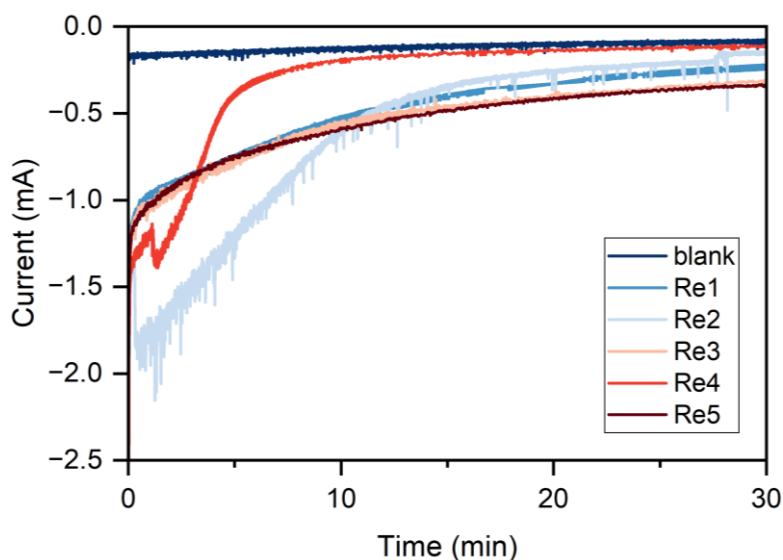

**Figure S36:** Current versus time plots for controlled potential electrolyses of **Re1-5** in  $\text{CO}_2$  saturated 0.5% (v/v) water/acetonitrile mixture  $-2.3 \text{ V vs } \text{Fc}^{+/0}$ . Blank trace shows current in the absence of any catalyst. Electrolyses were performed using a glassy carbon plate working electrode ( $A \sim 2 \text{ cm}^2$ ) and  $0.1 \text{ M } n\text{-Bu}_4\text{NBF}_4$  electrolyte.

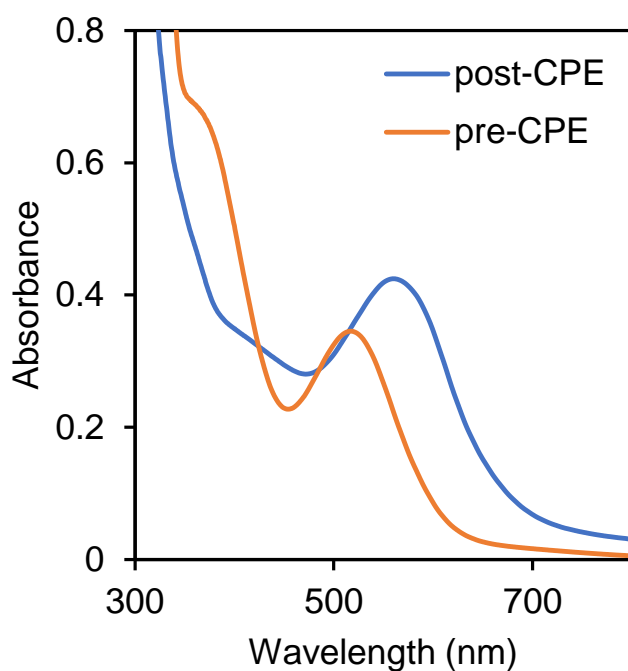

**Figure S37:** UV-vis spectra of **Re5** before and after 1 h electrolysis in  $\text{CO}_2$  saturated 0.5% water/acetonitrile mixture.

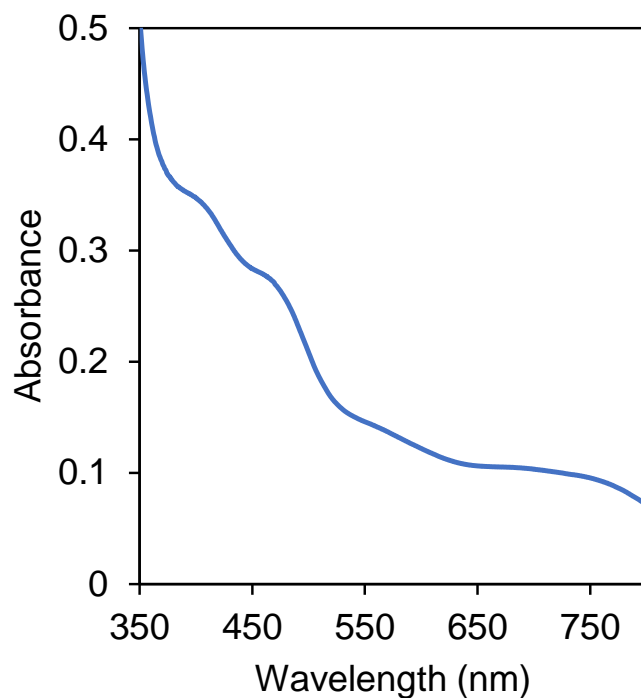

**Figure S38:** UV-vis spectrum of **Re1** after 1 h electrolysis in  $\text{CO}_2$  saturated 0.5% water/acetonitrile mixture. The pre-CPE concentration of **Re1** in the electrolyte (0.1 M  $\text{Bu}_4\text{NBF}_4$ ) was 0.25 mM.

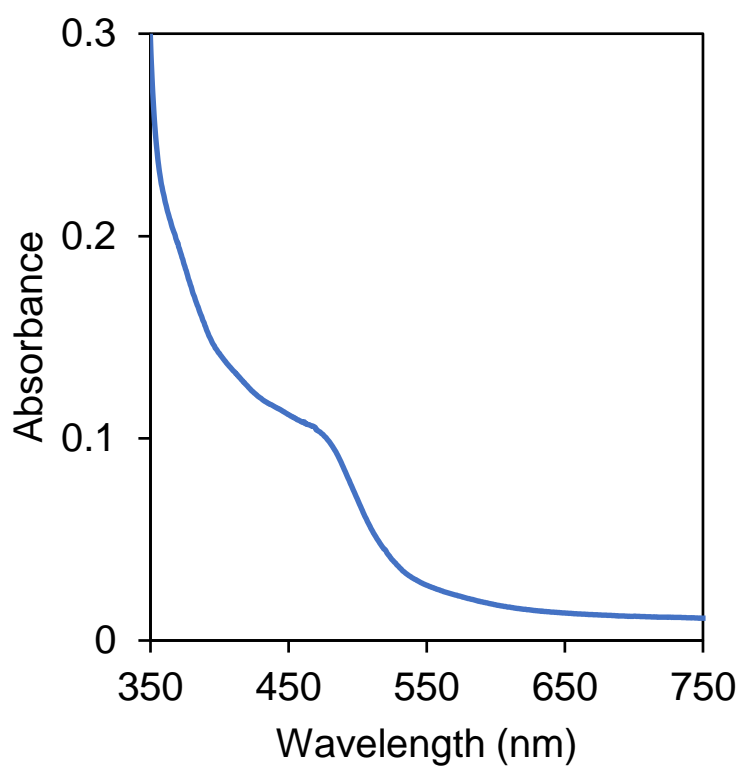

**Figure S39:** UV-vis spectrum of **Re2** after 1 h electrolysis in  $\text{CO}_2$  saturated 0.5% water/acetonitrile mixture. The pre-CPE concentration of **Re2** in the electrolyte (0.1 M  $\text{Bu}_4\text{NBF}_4$ ) was 0.25 mM.

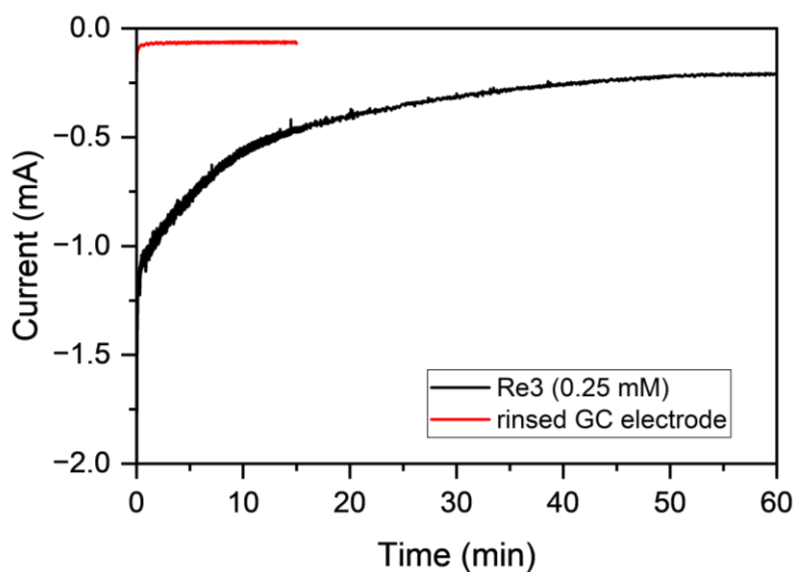

**Figure S40:** Current vs. time plot for a ‘Rinse test’ to exclude catalytically active deposit formation on electrode. Black trace shows the current vs. time plot for electrolysis of **Re3**. After electrolysis, the glassy carbon working electrode was removed, rinsed with acetonitrile and reused for a 15-min controlled potential electrolysis without any catalyst (red trace). A very low current demonstrates that the catalysis is homogeneous in nature.

**References:**

- 1 S. A. Moya, R. Pastene, H. Le Bozec, P. J. Baricelli, A. J. Pardey and J. Gimeno, *Inorganica Chim. Acta*, 2001, **312**, 7–14.
- 2 R. Kia and F. Safari, *Inorganica Chim. Acta*, 2016, **453**, 357–368.
- 3 G. R. Fulmer, A. J. M. Miller, N. H. Sherden, H. E. Gottlieb, A. Nudelman, B. M. Stoltz, J. E. Bercaw, and K. I. Goldberg, *Organomet.*, 2010, **29**, 2176–2179.

## Cartesian Coordinates

### 1. L1

**$E = -742.316928619992$  au**

0 imaginary frequencies

|   |                 |                 |                 |
|---|-----------------|-----------------|-----------------|
| N | 2.189845000000  | 0.125053000000  | -0.363231000000 |
| N | -0.289042000000 | 1.444332000000  | -0.391820000000 |
| N | -2.662767000000 | 0.303166000000  | -1.311087000000 |
| C | 3.320650000000  | -0.508778000000 | -0.673542000000 |
| H | 3.339100000000  | -1.577767000000 | -0.485821000000 |
| C | 4.436100000000  | 0.127146000000  | -1.206461000000 |
| H | 5.327723000000  | -0.438846000000 | -1.442853000000 |
| C | 4.365858000000  | 1.496480000000  | -1.424177000000 |
| H | 5.205761000000  | 2.034981000000  | -1.845481000000 |
| C | 3.195660000000  | 2.168464000000  | -1.099796000000 |
| H | 3.111206000000  | 3.232424000000  | -1.274674000000 |
| C | 2.121253000000  | 1.448379000000  | -0.569336000000 |
| C | 0.842396000000  | 2.133532000000  | -0.215100000000 |
| C | -1.460564000000 | 2.011473000000  | -0.086846000000 |
| C | -2.691737000000 | 1.196507000000  | -0.311804000000 |
| C | -3.749520000000 | -0.434006000000 | -1.538451000000 |
| C | -1.542377000000 | 3.314542000000  | 0.413506000000  |
| C | 0.843401000000  | 3.439254000000  | 0.283993000000  |
| C | -0.370200000000 | 4.031068000000  | 0.599699000000  |
| H | -0.402237000000 | 5.042010000000  | 0.986548000000  |
| H | 1.771168000000  | 3.972966000000  | 0.437149000000  |
| H | -2.500204000000 | 3.763970000000  | 0.635444000000  |
| C | -4.916678000000 | -0.332386000000 | -0.790056000000 |
| C | -3.822914000000 | 1.363219000000  | 0.493175000000  |
| C | -4.947449000000 | 0.587388000000  | 0.249413000000  |
| H | -3.687531000000 | -1.140231000000 | -2.360537000000 |
| H | -5.769651000000 | -0.957973000000 | -1.018603000000 |
| H | -3.818822000000 | 2.074727000000  | 1.307399000000  |
| H | -5.830346000000 | 0.697184000000  | 0.866908000000  |

### 2. L2

**$E = -973.313988510752$  au**

0 imaginary frequencies

|   |                 |                 |                 |
|---|-----------------|-----------------|-----------------|
| N | 2.136872000000  | 0.434943000000  | -0.514697000000 |
| N | -0.378926000000 | 1.607386000000  | -0.162857000000 |
| N | -2.828116000000 | 0.530311000000  | -1.013177000000 |
| C | 3.260568000000  | -0.103674000000 | -0.987389000000 |
| H | 3.335452000000  | -1.185132000000 | -0.931150000000 |
| C | 4.301787000000  | 0.642748000000  | -1.526760000000 |
| H | 5.191717000000  | 0.151848000000  | -1.898464000000 |
| C | 4.159537000000  | 2.022905000000  | -1.574284000000 |
| H | 4.938840000000  | 2.646683000000  | -1.994360000000 |



|   |                 |                 |                 |
|---|-----------------|-----------------|-----------------|
| C | 2.995855000000  | 2.595516000000  | -1.080371000000 |
| H | 2.856391000000  | 3.667153000000  | -1.121917000000 |
| C | 1.999877000000  | 1.767958000000  | -0.553507000000 |
| C | 0.729956000000  | 2.338519000000  | -0.012434000000 |
| C | -1.533060000000 | 2.086377000000  | 0.310967000000  |
| C | -2.750084000000 | 1.242073000000  | 0.120177000000  |
| C | -3.905676000000 | -0.227922000000 | -1.215232000000 |
| C | -1.621296000000 | 3.321298000000  | 0.953610000000  |
| C | 0.722572000000  | 3.581894000000  | 0.620016000000  |
| C | -0.474269000000 | 4.099213000000  | 1.118035000000  |
| H | 1.640255000000  | 4.143221000000  | 0.722228000000  |
| H | -2.575032000000 | 3.671857000000  | 1.321655000000  |
| C | -4.954019000000 | -0.328665000000 | -0.307862000000 |
| C | -3.757135000000 | 1.199802000000  | 1.088507000000  |
| C | -4.871181000000 | 0.401388000000  | 0.870126000000  |
| H | -3.935427000000 | -0.781701000000 | -2.148308000000 |
| H | -5.804515000000 | -0.962395000000 | -0.522690000000 |
| H | -3.662825000000 | 1.766620000000  | 2.004792000000  |
| H | -5.658206000000 | 0.347848000000  | 1.612201000000  |
| C | -0.524423000000 | 5.420253000000  | 1.790486000000  |
| C | -1.635094000000 | 6.259970000000  | 1.637119000000  |
| C | 0.537061000000  | 5.858142000000  | 2.592714000000  |
| C | -1.680338000000 | 7.500188000000  | 2.262680000000  |
| C | 0.487207000000  | 7.095591000000  | 3.223729000000  |
| C | -0.620480000000 | 7.922300000000  | 3.059875000000  |
| H | -2.460566000000 | 5.951354000000  | 1.008041000000  |
| H | 1.399056000000  | 5.219759000000  | 2.740543000000  |
| H | -2.543799000000 | 8.139278000000  | 2.123044000000  |
| H | 1.313942000000  | 7.412194000000  | 3.848128000000  |
| H | -0.657231000000 | 8.887969000000  | 3.549167000000  |

### 3. L3

**$E = -1012.617136712920$  au**

*0 imaginary frequencies*

|   |                 |                 |                 |
|---|-----------------|-----------------|-----------------|
| N | 2.144839000000  | 0.444352000000  | -0.478228000000 |
| N | -0.382655000000 | 1.606841000000  | -0.162536000000 |
| N | -2.825170000000 | 0.511465000000  | -1.008025000000 |
| C | 3.273706000000  | -0.095136000000 | -0.937743000000 |
| H | 3.357622000000  | -1.174449000000 | -0.857531000000 |
| C | 4.309330000000  | 0.647899000000  | -1.492312000000 |
| H | 5.203887000000  | 0.156474000000  | -1.852075000000 |
| C | 4.155472000000  | 2.025525000000  | -1.570268000000 |
| H | 4.930233000000  | 2.646342000000  | -2.003041000000 |
| C | 2.986448000000  | 2.599102000000  | -1.090293000000 |
| H | 2.837447000000  | 3.668330000000  | -1.155258000000 |
| C | 1.996791000000  | 1.774909000000  | -0.546423000000 |
| C | 0.721733000000  | 2.346287000000  | -0.017767000000 |

|   |                 |                 |                 |
|---|-----------------|-----------------|-----------------|
| C | -1.539968000000 | 2.086799000000  | 0.303331000000  |
| C | -2.752693000000 | 1.234654000000  | 0.118518000000  |
| C | -3.898826000000 | -0.253802000000 | -1.204553000000 |
| C | -1.635586000000 | 3.327594000000  | 0.932876000000  |
| C | 0.706197000000  | 3.597711000000  | 0.597853000000  |
| C | -0.493585000000 | 4.115709000000  | 1.089963000000  |
| H | 1.621740000000  | 4.164025000000  | 0.691768000000  |
| H | -2.592218000000 | 3.674574000000  | 1.296674000000  |
| C | -4.948361000000 | -0.350857000000 | -0.298147000000 |
| C | -3.761561000000 | 1.197121000000  | 1.085189000000  |
| C | -4.871379000000 | 0.391198000000  | 0.872741000000  |
| H | -3.924215000000 | -0.816713000000 | -2.132325000000 |
| H | -5.795246000000 | -0.991050000000 | -0.508163000000 |
| H | -3.671744000000 | 1.773887000000  | 1.995705000000  |
| H | -5.659554000000 | 0.341144000000  | 1.613878000000  |
| C | -0.551294000000 | 5.442291000000  | 1.747549000000  |
| C | -1.677474000000 | 6.262750000000  | 1.623399000000  |
| C | 0.521635000000  | 5.917029000000  | 2.514583000000  |
| C | -1.726340000000 | 7.508831000000  | 2.238040000000  |
| C | 0.464024000000  | 7.158124000000  | 3.131365000000  |
| C | -0.659894000000 | 7.981308000000  | 3.004444000000  |
| H | -2.518960000000 | 5.938294000000  | 1.023838000000  |
| H | 1.402585000000  | 5.301513000000  | 2.648320000000  |
| H | -2.608930000000 | 8.126163000000  | 2.114505000000  |
| H | 1.305969000000  | 7.493359000000  | 3.727168000000  |
| C | -0.707574000000 | 9.328743000000  | 3.672129000000  |
| H | -1.660128000000 | 9.828265000000  | 3.491414000000  |
| H | -0.571768000000 | 9.238417000000  | 4.753284000000  |
| H | 0.090805000000  | 9.979190000000  | 3.303976000000  |

#### 4. L4

***E = -3546.759084658975 au***

*0 imaginary frequencies*

|   |                 |                 |                 |
|---|-----------------|-----------------|-----------------|
| N | 2.138119000000  | 0.436426000000  | -0.508972000000 |
| N | -0.376481000000 | 1.612040000000  | -0.166316000000 |
| N | -2.824321000000 | 0.525132000000  | -1.008137000000 |
| C | 3.261594000000  | -0.106037000000 | -0.977613000000 |
| H | 3.335576000000  | -1.187185000000 | -0.914665000000 |
| C | 4.303750000000  | 0.636274000000  | -1.520940000000 |
| H | 5.193474000000  | 0.142339000000  | -1.889116000000 |
| C | 4.162794000000  | 2.016210000000  | -1.576855000000 |
| H | 4.942922000000  | 2.636700000000  | -2.000245000000 |
| C | 2.999348000000  | 2.592923000000  | -1.086967000000 |
| H | 2.860980000000  | 3.664456000000  | -1.134948000000 |
| C | 2.002479000000  | 1.769287000000  | -0.555923000000 |
| C | 0.732531000000  | 2.343399000000  | -0.018703000000 |
| C | -1.531091000000 | 2.091974000000  | 0.304991000000  |
| C | -2.747652000000 | 1.246054000000  | 0.119402000000  |
| C | -3.901765000000 | -0.234601000000 | -1.205046000000 |
| C | -1.619840000000 | 3.329413000000  | 0.942540000000  |

|    |                 |                 |                 |
|----|-----------------|-----------------|-----------------|
| C  | 0.725237000000  | 3.589163000000  | 0.609377000000  |
| C  | -0.472376000000 | 4.106483000000  | 1.104749000000  |
| H  | 1.642847000000  | 4.150867000000  | 0.710758000000  |
| H  | -2.573405000000 | 3.681260000000  | 1.309710000000  |
| C  | -4.951120000000 | -0.327674000000 | -0.297975000000 |
| C  | -3.755537000000 | 1.211770000000  | 1.087148000000  |
| C  | -4.869489000000 | 0.411837000000  | 0.874138000000  |
| H  | -3.930593000000 | -0.796172000000 | -2.133458000000 |
| H  | -5.801493000000 | -0.962992000000 | -0.508508000000 |
| H  | -3.662099000000 | 1.785783000000  | 1.999009000000  |
| H  | -5.657259000000 | 0.364511000000  | 1.615842000000  |
| C  | -0.524689000000 | 5.426140000000  | 1.778214000000  |
| C  | -1.635796000000 | 6.264125000000  | 1.628563000000  |
| C  | 0.532013000000  | 5.864555000000  | 2.584421000000  |
| C  | -1.695973000000 | 7.499850000000  | 2.260052000000  |
| C  | 0.482973000000  | 7.094629000000  | 3.228244000000  |
| C  | -0.634115000000 | 7.900815000000  | 3.058831000000  |
| H  | -2.461416000000 | 5.963252000000  | 0.996572000000  |
| H  | 1.399025000000  | 5.233903000000  | 2.733400000000  |
| H  | -2.560335000000 | 8.135266000000  | 2.122406000000  |
| H  | 1.305331000000  | 7.409590000000  | 3.856178000000  |
| Br | -0.710778000000 | 9.599376000000  | 3.944836000000  |

## 5. L5

**$E = -2391.766938733877$  au**

*0 imaginary frequencies*

|   |                 |                 |                 |
|---|-----------------|-----------------|-----------------|
| N | 2.138271000000  | 0.444137000000  | -0.709081000000 |
| N | -0.393384000000 | 1.599335000000  | -0.374721000000 |
| N | -2.836872000000 | 0.567435000000  | -1.303494000000 |
| C | 3.274154000000  | -0.074086000000 | -1.175992000000 |
| H | 3.355714000000  | -1.156173000000 | -1.148532000000 |
| C | 4.319989000000  | 0.693429000000  | -1.675146000000 |
| H | 5.220034000000  | 0.218852000000  | -2.043649000000 |
| C | 4.168988000000  | 2.073520000000  | -1.687967000000 |
| H | 4.951714000000  | 2.713099000000  | -2.076881000000 |
| C | 2.992643000000  | 2.624723000000  | -1.200227000000 |
| H | 2.844733000000  | 3.695889000000  | -1.214543000000 |
| C | 1.993096000000  | 1.776813000000  | -0.713589000000 |
| C | 0.711219000000  | 2.327502000000  | -0.179376000000 |
| C | -1.554177000000 | 2.065375000000  | 0.099723000000  |
| C | -2.770113000000 | 1.231649000000  | -0.140939000000 |
| C | -3.913098000000 | -0.180441000000 | -1.547882000000 |
| C | -1.653989000000 | 3.276337000000  | 0.781714000000  |
| C | 0.694189000000  | 3.546779000000  | 0.496189000000  |
| C | -0.510784000000 | 4.052696000000  | 0.990346000000  |
| H | 1.616848000000  | 4.086253000000  | 0.652041000000  |
| H | -2.619228000000 | 3.618899000000  | 1.125400000000  |
| C | -4.971327000000 | -0.316568000000 | -0.656995000000 |
| C | -3.788288000000 | 1.151653000000  | 0.813577000000  |

|    |                 |                 |                 |
|----|-----------------|-----------------|-----------------|
| C  | -4.900833000000 | 0.364898000000  | 0.550685000000  |
| H  | -3.933525000000 | -0.695287000000 | -2.503265000000 |
| H  | -5.819972000000 | -0.939977000000 | -0.906610000000 |
| H  | -3.701879000000 | 1.681297000000  | 1.752700000000  |
| H  | -5.696445000000 | 0.282331000000  | 1.280857000000  |
| Fe | -1.041702000000 | 7.201111000000  | 0.916372000000  |
| C  | 0.517729000000  | 6.249921000000  | 1.905807000000  |
| C  | -0.342106000000 | 7.928813000000  | -0.906066000000 |
| C  | -0.566773000000 | 5.330355000000  | 1.713230000000  |
| C  | 0.049553000000  | 7.339416000000  | 2.686346000000  |
| C  | -0.838717000000 | 9.000815000000  | -0.109983000000 |
| C  | -1.411183000000 | 7.014440000000  | -1.125939000000 |
| C  | -1.710256000000 | 5.888016000000  | 2.377623000000  |
| C  | -1.325832000000 | 7.115876000000  | 2.978012000000  |
| C  | -2.213552000000 | 8.747402000000  | 0.162164000000  |
| C  | -2.567621000000 | 7.518268000000  | -0.465293000000 |
| H  | 1.518347000000  | 6.143117000000  | 1.518848000000  |
| H  | 0.669868000000  | 7.820063000000  | -1.264020000000 |
| H  | 0.630601000000  | 8.198526000000  | 2.983540000000  |
| H  | -0.268183000000 | 9.846068000000  | 0.242660000000  |
| H  | -1.349788000000 | 6.088099000000  | -1.675971000000 |
| H  | -2.695722000000 | 5.452766000000  | 2.418743000000  |
| H  | -1.971676000000 | 7.773832000000  | 3.538340000000  |
| H  | -2.866151000000 | 9.367211000000  | 0.757230000000  |
| H  | -3.536301000000 | 7.044243000000  | -0.431991000000 |

## 6. Rel

**$E = -3734.835146463211$  au**

*0 imaginary frequencies*

|    |                 |                 |                 |
|----|-----------------|-----------------|-----------------|
| Re | 0.274653000000  | -0.879752000000 | -0.076046000000 |
| Br | 0.813799000000  | -0.272336000000 | 2.495956000000  |
| O  | -2.385549000000 | -2.185616000000 | 0.786550000000  |
| O  | 1.433536000000  | -3.700067000000 | 0.310963000000  |
| O  | -0.301282000000 | -1.591578000000 | -3.007923000000 |
| N  | 2.169979000000  | 0.138151000000  | -0.555618000000 |
| N  | -0.227075000000 | 1.335982000000  | -0.239063000000 |
| N  | -2.852761000000 | 0.480544000000  | -1.410382000000 |
| C  | -1.414477000000 | -1.659726000000 | 0.454208000000  |
| C  | 0.999103000000  | -2.638924000000 | 0.163904000000  |
| C  | -0.092650000000 | -1.297773000000 | -1.907592000000 |
| C  | 3.312022000000  | -0.508401000000 | -0.836072000000 |
| H  | 3.268001000000  | -1.587321000000 | -0.844327000000 |
| C  | 4.496225000000  | 0.151365000000  | -1.107673000000 |
| H  | 5.387343000000  | -0.419411000000 | -1.329561000000 |
| C  | 4.502666000000  | 1.539443000000  | -1.091883000000 |
| H  | 5.407835000000  | 2.093183000000  | -1.304608000000 |
| C  | 3.326588000000  | 2.211694000000  | -0.806221000000 |
| H  | 3.312435000000  | 3.290510000000  | -0.805815000000 |
| C  | 2.165281000000  | 1.488023000000  | -0.537177000000 |
| C  | 0.868668000000  | 2.136993000000  | -0.261911000000 |

|   |                 |                 |                 |
|---|-----------------|-----------------|-----------------|
| C | -1.440029000000 | 1.908982000000  | -0.084022000000 |
| C | -2.689647000000 | 1.109285000000  | -0.240100000000 |
| C | -4.000425000000 | -0.163250000000 | -1.623805000000 |
| C | -1.578130000000 | 3.273384000000  | 0.157935000000  |
| C | 0.779755000000  | 3.509153000000  | -0.046300000000 |
| C | -0.455699000000 | 4.081683000000  | 0.191401000000  |
| H | -0.543319000000 | 5.143942000000  | 0.378321000000  |
| H | 1.667293000000  | 4.122400000000  | -0.049713000000 |
| H | -2.566876000000 | 3.689168000000  | 0.290600000000  |
| C | -5.031460000000 | -0.214542000000 | -0.692186000000 |
| C | -3.669435000000 | 1.118112000000  | 0.751760000000  |
| C | -4.857800000000 | 0.438266000000  | 0.520206000000  |
| H | -4.103637000000 | -0.657193000000 | -2.584441000000 |
| H | -5.943402000000 | -0.751710000000 | -0.918037000000 |
| H | -3.498658000000 | 1.638787000000  | 1.684725000000  |
| H | -5.633181000000 | 0.419839000000  | 1.275936000000  |

## 7. Re2

**$E = -3965.832843722565$  au**

0 imaginary frequencies

|    |                 |                 |                 |
|----|-----------------|-----------------|-----------------|
| Re | 0.254279000000  | -0.716825000000 | -0.341322000000 |
| Br | 1.082775000000  | -0.642060000000 | 2.227088000000  |
| O  | -2.273687000000 | -2.274559000000 | 0.499850000000  |
| O  | 1.490448000000  | -3.512536000000 | -0.660113000000 |
| O  | -0.656264000000 | -0.852047000000 | -3.270981000000 |
| N  | 2.071939000000  | 0.443214000000  | -0.808184000000 |
| N  | -0.277529000000 | 1.462845000000  | 0.017525000000  |
| N  | -3.001867000000 | 0.843371000000  | -1.058099000000 |
| C  | -1.354200000000 | -1.651124000000 | 0.189436000000  |
| C  | 1.024413000000  | -2.461223000000 | -0.544039000000 |
| C  | -0.319213000000 | -0.772481000000 | -2.165989000000 |
| C  | 3.171081000000  | -0.090021000000 | -1.363311000000 |
| H  | 3.130892000000  | -1.142761000000 | -1.601193000000 |
| C  | 4.306448000000  | 0.651447000000  | -1.632355000000 |
| H  | 5.164069000000  | 0.171923000000  | -2.083526000000 |
| C  | 4.306661000000  | 2.003424000000  | -1.317759000000 |
| H  | 5.172719000000  | 2.620396000000  | -1.518845000000 |
| C  | 3.173887000000  | 2.559750000000  | -0.748413000000 |
| H  | 3.154212000000  | 3.614113000000  | -0.519372000000 |
| C  | 2.061614000000  | 1.756917000000  | -0.496748000000 |
| C  | 0.802420000000  | 2.283619000000  | 0.068237000000  |
| C  | -1.466736000000 | 1.962159000000  | 0.416295000000  |
| C  | -2.723587000000 | 1.185439000000  | 0.205662000000  |
| C  | -4.161994000000 | 0.234077000000  | -1.303838000000 |
| C  | -1.583624000000 | 3.229517000000  | 0.973088000000  |
| C  | 0.733042000000  | 3.561552000000  | 0.605272000000  |
| C  | -0.469643000000 | 4.057336000000  | 1.103714000000  |
| H  | 1.618521000000  | 4.176263000000  | 0.637967000000  |
| H  | -2.558512000000 | 3.559719000000  | 1.301397000000  |
| C  | -5.092720000000 | -0.062743000000 | -0.314244000000 |

|   |                 |                 |                 |
|---|-----------------|-----------------|-----------------|
| C | -3.595600000000 | 0.931049000000  | 1.263193000000  |
| C | -4.798655000000 | 0.291357000000  | 0.995189000000  |
| H | -4.359995000000 | -0.024185000000 | -2.339021000000 |
| H | -6.020820000000 | -0.557094000000 | -0.570159000000 |
| H | -3.332690000000 | 1.222887000000  | 2.271343000000  |
| H | -5.492728000000 | 0.073993000000  | 1.797407000000  |
| C | -0.560146000000 | 5.399578000000  | 1.718915000000  |
| C | -1.717995000000 | 6.176443000000  | 1.582533000000  |
| C | 0.511545000000  | 5.918201000000  | 2.457576000000  |
| C | -1.798449000000 | 7.435755000000  | 2.163718000000  |
| C | 0.424854000000  | 7.173591000000  | 3.046104000000  |
| C | -0.728915000000 | 7.938187000000  | 2.899294000000  |
| H | -2.552905000000 | 5.806388000000  | 1.001091000000  |
| H | 1.409226000000  | 5.328269000000  | 2.593481000000  |
| H | -2.697307000000 | 8.026935000000  | 2.038282000000  |
| H | 1.258898000000  | 7.552719000000  | 3.623954000000  |
| H | -0.794225000000 | 8.918429000000  | 3.355395000000  |

## 8. Re3

***E = -4005.136265536305 au***

*0 imaginary frequencies*

|    |                 |                 |                 |
|----|-----------------|-----------------|-----------------|
| Re | 0.254032000000  | -0.712366000000 | -0.333985000000 |
| Br | 1.074575000000  | -0.624302000000 | 2.237161000000  |
| O  | -2.279174000000 | -2.263251000000 | 0.503684000000  |
| O  | 1.492559000000  | -3.509727000000 | -0.628718000000 |
| O  | -0.643231000000 | -0.865467000000 | -3.266952000000 |
| N  | 2.074056000000  | 0.444578000000  | -0.800781000000 |
| N  | -0.277967000000 | 1.469648000000  | 0.010010000000  |
| N  | -3.001230000000 | 0.843478000000  | -1.062074000000 |
| C  | -1.357591000000 | -1.642147000000 | 0.194595000000  |
| C  | 1.024459000000  | -2.458285000000 | -0.521923000000 |
| C  | -0.310845000000 | -0.779150000000 | -2.160977000000 |
| C  | 3.175569000000  | -0.093099000000 | -1.346901000000 |
| H  | 3.136658000000  | -1.147951000000 | -1.575375000000 |
| C  | 4.311686000000  | 0.646296000000  | -1.618131000000 |
| H  | 5.171420000000  | 0.162976000000  | -2.061097000000 |
| C  | 4.309841000000  | 2.001182000000  | -1.316206000000 |
| H  | 5.176201000000  | 2.616829000000  | -1.519919000000 |
| C  | 3.174700000000  | 2.562031000000  | -0.756090000000 |
| H  | 3.153600000000  | 3.618429000000  | -0.536964000000 |
| C  | 2.061969000000  | 1.760969000000  | -0.500707000000 |
| C  | 0.801293000000  | 2.291606000000  | 0.057851000000  |
| C  | -1.467058000000 | 1.971321000000  | 0.407159000000  |
| C  | -2.724272000000 | 1.194428000000  | 0.199618000000  |
| C  | -4.161563000000 | 0.233551000000  | -1.305108000000 |
| C  | -1.583282000000 | 3.239486000000  | 0.960922000000  |
| C  | 0.731679000000  | 3.572080000000  | 0.588009000000  |
| C  | -0.470283000000 | 4.070612000000  | 1.088357000000  |
| H  | 1.617361000000  | 4.186505000000  | 0.614893000000  |

|   |                 |                 |                 |
|---|-----------------|-----------------|-----------------|
| H | -2.557762000000 | 3.569232000000  | 1.290312000000  |
| C | -5.094119000000 | -0.055368000000 | -0.314908000000 |
| C | -3.598166000000 | 0.947853000000  | 1.257572000000  |
| C | -4.801519000000 | 0.307615000000  | 0.992416000000  |
| H | -4.358234000000 | -0.031980000000 | -2.338689000000 |
| H | -6.022316000000 | -0.550571000000 | -0.568709000000 |
| H | -3.336387000000 | 1.246060000000  | 2.264115000000  |
| H | -5.496879000000 | 0.096585000000  | 1.795183000000  |
| C | -0.562292000000 | 5.411111000000  | 1.702192000000  |
| C | -1.737535000000 | 6.166571000000  | 1.621345000000  |
| C | 0.525319000000  | 5.961693000000  | 2.395494000000  |
| C | -1.819172000000 | 7.423292000000  | 2.208173000000  |
| C | 0.433435000000  | 7.212098000000  | 2.986478000000  |
| C | -0.739585000000 | 7.970308000000  | 2.903940000000  |
| H | -2.592245000000 | 5.784553000000  | 1.077426000000  |
| H | 1.443561000000  | 5.396895000000  | 2.497386000000  |
| H | -2.738940000000 | 7.990113000000  | 2.120410000000  |
| H | 1.286254000000  | 7.605883000000  | 3.528183000000  |
| C | -0.824883000000 | 9.327717000000  | 3.545464000000  |
| H | -1.815956000000 | 9.765039000000  | 3.420403000000  |
| H | -0.610243000000 | 9.270723000000  | 4.615973000000  |
| H | -0.093475000000 | 10.014664000000 | 3.110426000000  |

## 9. Re4

**$E = -6539.277625232964$  au**

0 imaginary frequencies

|    |                 |                 |                 |
|----|-----------------|-----------------|-----------------|
| Re | 0.255110000000  | -0.714429000000 | -0.336620000000 |
| Br | 1.079574000000  | -0.624375000000 | 2.232384000000  |
| O  | -2.274909000000 | -2.267214000000 | 0.507410000000  |
| O  | 1.498322000000  | -3.509291000000 | -0.633067000000 |
| O  | -0.648590000000 | -0.868397000000 | -3.267703000000 |
| N  | 2.072659000000  | 0.444428000000  | -0.807479000000 |
| N  | -0.278919000000 | 1.467609000000  | 0.010128000000  |
| N  | -3.001184000000 | 0.836501000000  | -1.060966000000 |
| C  | -1.354535000000 | -1.645811000000 | 0.195685000000  |
| C  | 1.027964000000  | -2.459058000000 | -0.525766000000 |
| C  | -0.313710000000 | -0.781979000000 | -2.162624000000 |
| C  | 3.172553000000  | -0.090237000000 | -1.359540000000 |
| H  | 3.134352000000  | -1.144593000000 | -1.590428000000 |
| C  | 4.306382000000  | 0.651792000000  | -1.633919000000 |
| H  | 5.164835000000  | 0.170859000000  | -2.081956000000 |
| C  | 4.304038000000  | 2.005908000000  | -1.328856000000 |
| H  | 5.168516000000  | 2.623334000000  | -1.535169000000 |
| C  | 3.170452000000  | 2.563717000000  | -0.762395000000 |
| H  | 3.148014000000  | 3.619647000000  | -0.540891000000 |
| C  | 2.060424000000  | 1.760016000000  | -0.504298000000 |
| C  | 0.801125000000  | 2.288113000000  | 0.058983000000  |
| C  | -1.468473000000 | 1.967328000000  | 0.407262000000  |
| C  | -2.724919000000 | 1.189310000000  | 0.200237000000  |

|    |                 |                 |                 |
|----|-----------------|-----------------|-----------------|
| C  | -4.160644000000 | 0.224593000000  | -1.303030000000 |
| C  | -1.585319000000 | 3.235679000000  | 0.962160000000  |
| C  | 0.732609000000  | 3.566508000000  | 0.595256000000  |
| C  | -0.470315000000 | 4.061543000000  | 1.092848000000  |
| H  | 1.618469000000  | 4.180707000000  | 0.628957000000  |
| H  | -2.559870000000 | 3.566507000000  | 1.290873000000  |
| C  | -5.092489000000 | -0.064566000000 | -0.312144000000 |
| C  | -3.598097000000 | 0.943196000000  | 1.258823000000  |
| C  | -4.800409000000 | 0.300549000000  | 0.994676000000  |
| H  | -4.357147000000 | -0.042537000000 | -2.336212000000 |
| H  | -6.019926000000 | -0.561613000000 | -0.565140000000 |
| H  | -3.336571000000 | 1.243250000000  | 2.264902000000  |
| H  | -5.495277000000 | 0.089397000000  | 1.797835000000  |
| C  | -0.559664000000 | 5.401144000000  | 1.712766000000  |
| C  | -1.712647000000 | 6.183354000000  | 1.577285000000  |
| C  | 0.507652000000  | 5.912888000000  | 2.460249000000  |
| C  | -1.801847000000 | 7.438008000000  | 2.165720000000  |
| C  | 0.428326000000  | 7.161187000000  | 3.062626000000  |
| C  | -0.728540000000 | 7.912638000000  | 2.907472000000  |
| H  | -2.548213000000 | 5.825955000000  | 0.989487000000  |
| H  | 1.405901000000  | 5.325071000000  | 2.598856000000  |
| H  | -2.697256000000 | 8.031312000000  | 2.039774000000  |
| H  | 1.258334000000  | 7.533091000000  | 3.647604000000  |
| Br | -0.844089000000 | 9.636236000000  | 3.736055000000  |

## 10.Re5

**$E = -5384.286714240699$  au**

*0 imaginary frequencies*

|    |                 |                 |                 |
|----|-----------------|-----------------|-----------------|
| Re | 0.258215000000  | -0.742999000000 | -0.329794000000 |
| Br | 1.045967000000  | -0.636532000000 | 2.251553000000  |
| O  | -2.287587000000 | -2.284880000000 | 0.486267000000  |
| O  | 1.490537000000  | -3.547121000000 | -0.587500000000 |
| O  | -0.590122000000 | -0.916129000000 | -3.276143000000 |
| N  | 2.084636000000  | 0.411677000000  | -0.776613000000 |
| N  | -0.281107000000 | 1.439616000000  | -0.010738000000 |
| N  | -2.990660000000 | 0.808696000000  | -1.112527000000 |
| C  | -1.360741000000 | -1.668167000000 | 0.183711000000  |
| C  | 1.028099000000  | -2.491686000000 | -0.494507000000 |
| C  | -0.277785000000 | -0.822278000000 | -2.164764000000 |
| C  | 3.196121000000  | -0.129610000000 | -1.298714000000 |
| H  | 3.161585000000  | -1.186127000000 | -1.520204000000 |
| C  | 4.336999000000  | 0.608041000000  | -1.553793000000 |
| H  | 5.205076000000  | 0.121816000000  | -1.976910000000 |
| C  | 4.329196000000  | 1.965193000000  | -1.261557000000 |
| H  | 5.199241000000  | 2.579587000000  | -1.453111000000 |
| C  | 3.183631000000  | 2.529643000000  | -0.727129000000 |
| H  | 3.158052000000  | 3.587655000000  | -0.516077000000 |
| C  | 2.066582000000  | 1.729996000000  | -0.485950000000 |
| C  | 0.796090000000  | 2.264012000000  | 0.046746000000  |



|    |                 |                 |                 |
|----|-----------------|-----------------|-----------------|
| C  | -1.474900000000 | 1.944099000000  | 0.372892000000  |
| C  | -2.729888000000 | 1.167389000000  | 0.150648000000  |
| C  | -4.147793000000 | 0.198571000000  | -1.367658000000 |
| C  | -1.599341000000 | 3.213405000000  | 0.918578000000  |
| C  | 0.721206000000  | 3.545061000000  | 0.571781000000  |
| C  | -0.487313000000 | 4.047809000000  | 1.054951000000  |
| H  | 1.613034000000  | 4.147586000000  | 0.631285000000  |
| H  | -2.581784000000 | 3.550424000000  | 1.214583000000  |
| C  | -5.094459000000 | -0.082947000000 | -0.388815000000 |
| C  | -3.618907000000 | 0.927899000000  | 1.197803000000  |
| C  | -4.819429000000 | 0.287715000000  | 0.920212000000  |
| H  | -4.330543000000 | -0.073365000000 | -2.402155000000 |
| H  | -6.019675000000 | -0.578683000000 | -0.652374000000 |
| H  | -3.370496000000 | 1.231765000000  | 2.206053000000  |
| H  | -5.526077000000 | 0.082512000000  | 1.714641000000  |
| Fe | -1.077046000000 | 7.176431000000  | 0.767728000000  |
| C  | 0.488963000000  | 6.318271000000  | 1.827879000000  |
| C  | -0.372149000000 | 7.830518000000  | -1.080651000000 |
| C  | -0.577500000000 | 5.367488000000  | 1.679684000000  |
| C  | -0.009127000000 | 7.439277000000  | 2.539425000000  |
| C  | -0.894984000000 | 8.928651000000  | -0.338967000000 |
| C  | -1.423074000000 | 6.888555000000  | -1.267995000000 |
| C  | -1.740338000000 | 5.941412000000  | 2.297702000000  |
| C  | -1.383582000000 | 7.206628000000  | 2.829621000000  |
| C  | -2.267584000000 | 8.663722000000  | -0.068303000000 |
| C  | -2.594389000000 | 7.401340000000  | -0.641828000000 |
| H  | 1.497096000000  | 6.207783000000  | 1.462137000000  |
| H  | 0.645031000000  | 7.723465000000  | -1.424044000000 |
| H  | 0.551884000000  | 8.325273000000  | 2.792701000000  |
| H  | -0.342249000000 | 9.797656000000  | -0.017070000000 |
| H  | -1.340788000000 | 5.940541000000  | -1.777028000000 |
| H  | -2.717662000000 | 5.490140000000  | 2.356320000000  |
| H  | -2.047363000000 | 7.884287000000  | 3.343505000000  |
| H  | -2.936535000000 | 9.298283000000  | 0.492159000000  |
| H  | -3.555042000000 | 6.912367000000  | -0.595221000000 |
